# Supplementary material for: El término "conscripti" en la epigrafía hispana e italiana: un nuevo acercamiento a su significado
Source: Royal Society of Chemistry journal article supplement (doi:10.1039/d2ob01179d), 1999-01-01
Supplement: d2ob01179d1.pdf [file d2ob01179d1.pdf]

## Supplementary Information

# Design of Rotational Potential in Phenyltriptycene Molecular Rotor by Exploiting CH/ $\pi$ -Interaction between Triptical Hydrogen and Phenyl

Hazuki Inami,<sup>a</sup> Yusuke Inagaki,<sup>a</sup> and Wataru Setaka<sup>\*,a</sup>

*<sup>a</sup>Division of Applied Chemistry, Faculty of Urban Environmental Sciences, Tokyo Metropolitan University, Hachioji, Tokyo 192-0397, Japan*

E-mail: wsetaka@tmu.ac.jp

(Total 36 pages including this cover page)

1. Experimental Procedure
2. Copies of NMR and HRMS Spectra for New Compounds
3. Details of NMR Study
4. Details of X-ray Crystallography
5. Details of DFT Calculations

## 1. Experimental Procedure

All reactions were conducted under an argon atmosphere. The chemical shifts of  $^1\text{H}$  and  $^{13}\text{C}$  NMR spectra are based on the residual solvent resonances. Preparatory gel permeation chromatography (GPC) was carried out using a recycling preparative chromatograph; chloroform stabilized with ethanol was used as the eluent. Commercially available reagents were used without further purification.

### Synthesis of 3,5-dinitrophenyl-9-anthracene (**17**)

A 2 M  $\text{Na}_2\text{CO}_3$  aqueous solution (100 mL) was added to a solution of 9-bromoanthracene (**15**, 5.25 g, 20.4 mmol), 2-(3,5-dinitrophenyl)-4,4,5,5-tetramethyl-1,3,2-dioxaborolane (**16**, 5.00 g, 17.0 mmol), and  $\text{PdCl}_2(\text{PPh}_3)_2$  (50 mg) in tetrahydrofuran (200 mL). After stirring at 60 °C for 30 h, the reaction mixture was cooled to room temperature. The volatile materials were removed in vacuo and the residue was extracted with dichloromethane. The organic layer was washed with saturated aqueous  $\text{NaHCO}_3$  solution and dried over anhydrous  $\text{Na}_2\text{SO}_4$ . The concentrated residue was purified by silica gel column chromatography (with chloroform as the eluent), and pure 9-(3,5-dinitrophenyl)anthracene (**17**, 2.06 g, 5.97 mmol, 35.2%) was obtained as yellow crystals. In this column chromatography, 9-bromoanthracene (**15**) was recovered.

**17**: yellow crystals; mp 194-196 °C;  $^1\text{H}$  NMR ( $\text{CDCl}_3$ , 500 MHz)  $\delta$  9.22 (s, 1H), 8.64 (s, 2H), 8.62 (s, 1H), 8.10 (d,  $J = 8.5$  Hz, 2H), 7.51 (dd,  $J = 8.5, 7.0$  Hz, 2H), 7.43 (t,  $J = 7.0$  Hz, 2H), 7.42 (d,  $J = 7.0$  Hz, 2H);  $^{13}\text{C}\{^1\text{H}\}$  NMR ( $\text{CDCl}_3$ , 126 MHz)  $\delta$  148.8, 143.0, 131.7, 131.2, 130.7, 129.8, 129.0, 128.9, 127.0, 125.6, 124.8, 118.1; HRMS (APCI-TOF)  $m/z$ :  $[\text{M} + \text{H}]^+$  Calcd for  $\text{C}_{20}\text{H}_{12}\text{N}_2\text{O}_2$ : 345.0870, found: 345.0882.

### Synthesis of 9-(3,5-dinitrophenyl)triptycene (**12**)

In a flask, 9-(3,5-dinitrophenyl)anthracene (**17**) (1.70 g, 4.94 mmol) was dissolved in 1,2-dichloroethane (80 mL). The flask was heated and the reaction mixture was stirred at 40 °C. A 1,2-dichloroethane (70 mL) solution of isoamyl nitrite (2.32 g, 19.8 mmol) and a 1,2-dimethoxyethane (100 mL) solution of anthranilic acid (2.03 g, 14.8 mmol) were simultaneously added dropwise to the flask over 2 h at 40 °C. After stirring at 40 °C for 48 h, the reaction mixture was cooled to room temperature. Volatile materials were removed in vacuo. Chloroform was added to the residue, and the remaining crude product was filtered. The crude product was purified using silica gel column chromatography (silica gel, dichloroethane as the eluent). Pure 9-(3,5-dinitrophenyl)triptycene (**12**, 0.463 g, 1.10 mmol, 22.3%) was obtained by recrystallization from dichloromethane as pale yellow crystals.

**12**: pale yellow crystals, mp > 300 °C; <sup>1</sup>H NMR (C<sub>2</sub>D<sub>2</sub>Cl<sub>4</sub>, 500 MHz) δ 9.29 (d, *J* = 2.0 Hz, 2H), 9.18 (t, *J* = 2.0 Hz, 1H), 7.48 (d, *J* = 7.0 Hz, 3H), 7.04-7.10 (m, 3H), 6.95-7.02 (m, 6H), 5.47 (s, 1H); <sup>13</sup>C{<sup>1</sup>H} NMR (C<sub>2</sub>D<sub>2</sub>Cl<sub>4</sub>, 126 MHz) δ 149.0, 146.5, 144.9, 141.5, 131.5, 126.9, 125.6, 124.9, 123.4, 118.3, 60.1, 54.9; HRMS (APCI-TOF) *m/z*: [M + H]<sup>+</sup> Calcd for C<sub>26</sub>H<sub>16</sub>N<sub>2</sub>O<sub>4</sub>, 421.1183; Found, 421.1167.

### Synthesis of 9-(3,5-diaminophenyl)triptycene (**13**)

In an autoclave, hydrogen gas (3 atm) was introduced into a mixture of 9-(3,5-dinitrophenyl)anthracene (**12**) (0.10 g, 0.24 mmol), dichloroethane (20 mL), methanol (10 mL), and 10% Pd/C (0.05 g). The mixture was then allowed to stand for 72 h at 60 °C. After the excess H<sub>2</sub> gas was released, the mixture was filtered to remove Pd/C. Volatile materials were removed in vacuo. Pure 9-(3,5-diaminophenyl)anthracene (**13**, 0.051 mg, 1.41 mmol, 59% yield) was obtained by column chromatography (silica gel, ethyl acetate as the eluent), followed by recrystallization from toluene.

**13**: colorless crystals, mp 275 °C (decomp.); <sup>1</sup>H NMR (CDCl<sub>3</sub>, 500 MHz) δ 7.41 (d, *J* = 7.5 Hz, 3H), 7.37 (d, *J* = 7.5 Hz, 2H), 6.96 (t, *J* = 7.5 Hz, 3H), 6.91 (d, *J* = 7.5 Hz, 3H), 6.86 (s, 2H), 6.21 (s, 1H), 5.35 (s, 1H), 3.74 (br, 4H); <sup>13</sup>C{<sup>1</sup>H} NMR (CDCl<sub>3</sub>, 126 MHz) δ 147.4, 146.8, 146.7, 138.5, 125.0, 124.9, 124.4, 123.4, 109.6, 100.8, 60.3, 55.2; HRMS (APCI-TOF) *m/z*: [M + H]<sup>+</sup> Calcd for C<sub>26</sub>H<sub>20</sub>N<sub>2</sub>, 361.1699; Found, 361.1691.

### Synthesis of 1-Chloro-10-(3,5-dimethoxyphenyl)anthracene (**20**)

1-Chloroanthrone (**18**, 1.17 g, 5.15 mmol) was dissolved in dry tetrahydrofuran (THF, 12 mL) in a flask equipped with a magnetic stirrer, condenser, and dropping funnel. A 1 M THF solution of 3,5-dimethoxyphenyl bromide (200 mL) prepared from the corresponding 1-bromo-3,5-dimethoxybenzene (**19**, 5.34 g, 24.6 mmol) and magnesium (634 mg, 26.1 mmol) was introduced dropwise into the reaction flask. The reaction mixture was stirred for 2 h under reflux. The mixture was hydrolyzed using 10% H<sub>2</sub>SO<sub>4</sub> (aq) and extracted with dichloromethane (DCM). The organic layer was washed with saturated NaHCO<sub>3</sub> (aq) and concentrated. The residue and acetic acid (5 mL) were placed in a flask and refluxed for 30 min. The mixture was washed with water and extracted with dichloromethane. The organic layer was then dried over anhydrous Na<sub>2</sub>SO<sub>4</sub>. After the removal of Na<sub>2</sub>SO<sub>4</sub>, the solution was concentrated, and the crude products were obtained as a yellow oil. Pure compound **20** (1.02 g, 2.93 mmol, 56.9%) was obtained after column chromatography (silica gel, chloroform:hexane = 2:1 as the eluent), followed by purification via gel permeation chromatography (GPC).

**20**: colorless crystals, mp 137–138 °C; <sup>1</sup>H NMR (CDCl<sub>3</sub>, 500 MHz) δ 8.92 (s, 1H), 8.10 (d, *J* = 8.5 Hz, 3H), 7.71 (d, *J* = 8.5 Hz, 2H), 7.66 (d, *J* = 8.0 Hz, 1H), 7.55 (d, *J* = 7.0 Hz, 1H), 7.49 (dd, *J* = 8.5, 7.0 Hz, 1H), 7.39 (dd, *J* = 8.5, 7.0 Hz, 1H), 7.23 (dd, *J* = 8.0, 7.0 Hz, 1H), 6.62 (t, *J* = 2.3 Hz, 1H), 6.56 (d, *J* = 2.3 Hz, 2H), 3.81 (s, 6H); <sup>13</sup>C{<sup>1</sup>H} NMR (CDCl<sub>3</sub>, 126 MHz) δ 160.8, 140.5, 137.6, 132.0, 131.7, 130.7, 130.3, 128.8, 128.6, 126.8, 126.4, 126.2, 125.8, 125.1, 124.6, 123.7, 109.2, 99.9, 55.4; HRMS (APCI-TOF) *m/z*: [M]<sup>+</sup> Calcd for C<sub>22</sub>H<sub>17</sub>ClO<sub>2</sub>, 348.0912; Found, 348.0906.

### Synthesis of 1,4,5-Trichloro-9-(3,5-dimethoxyphenyl)triptycene (**14**)

A 1,2-dichloroethane (8 mL) solution of 1-chloro-10-(3,5-dimethoxyphenyl)anthracene (**20**, 0.15 g, 0.43 mmol) (1.70 g, 4.94 mmol) was placed in a flask. A 1,2-dichloroethane (6 mL) solution of isoamyl nitrite (0.20 g, 1.7 mmol) and a 1,2-dimethoxyethane (9 mL) solution of 3,6-dichloroanthranilic acid (0.26 g, 37 mmol) were simultaneously added dropwise to the flask over 6 h at 150 °C. After stirring for 20 h, the reaction mixture was allowed to cool to room temperature. Volatile materials were removed in vacuo. The crude products were obtained after recrystallization from the methanol solution of the residue. Pure 1,4,5-trichloro-9-(3,5-dimethoxyphenyl)triptycene (**14**, 0.095 g, 0.19 mmol, 45%) was obtained as colorless crystals by column chromatography (silica gel, chloroform as the eluent), followed by GPC purification and recrystallization from methanol.

**14**: colorless crystals, mp 185–186 °C; <sup>1</sup>H NMR (CDCl<sub>3</sub>, 500 MHz, 300 K) δ 7.53 (dd, *J* = 7.4, 1.0 Hz, 1H, H<sub>16</sub>), 7.25 (dd, *J* = 7.5, 1.0 Hz, 1H, H<sub>13</sub>), 7.10 (dd, *J* = 7.4, 1.0 Hz, 1H, H<sub>6</sub>), 7.08 (td, *J* = 7.4, 1.0 Hz, 1H, H<sub>15</sub>), 7.04 (dd, *J* = 7.5, 7.4 Hz, 1H, H<sub>14</sub>), 7.03 (d, *J* = 1.8 Hz, 2H, H<sub>Ph2</sub>), 6.97 (d, *J* = 7.7, 1.0 Hz, 1H, H<sub>3</sub>), 6.92 (d, *J* = 7.7, 1.0 Hz, 1H, H<sub>2</sub>), 6.92 (dd, *J* = 7.4, 1.0 Hz, 1H, H<sub>8</sub>), 6.89 (t, *J* = 7.4, 1.0 Hz, 1H, H<sub>7</sub>), 6.61 (t, *J* = 1.8 Hz, 1H, H<sub>Ph4</sub>), 6.55 (s, 1H, H<sub>10</sub>), 3.84 (s, 6H, H<sub>Me</sub>); <sup>13</sup>C{<sup>1</sup>H} NMR (CDCl<sub>3</sub>, 126 MHz) δ 160.2 (C<sub>Ph3</sub>), 148.9 (C<sub>8a</sub>), 147.1 (C<sub>4a</sub>), 145.6 (duplicated, C<sub>9a</sub> and C<sub>12</sub>), 144.0 (C<sub>11</sub>), 141.8 (C<sub>10a</sub>), 137.7 (C<sub>Ph1</sub>), 129.7 (C<sub>5</sub>), 129.6 (C<sub>2</sub>), 129.1 (C<sub>4</sub>), 128.5 (C<sub>1</sub>), 126.8 (C<sub>3</sub>), 126.4 (C<sub>6</sub>), 126.1 (C<sub>7</sub>), 125.9 (C<sub>15</sub>), 125.7 (C<sub>13</sub>), 125.6 (C<sub>14</sub>), 124.4 (C<sub>16</sub>), 124.2 (C<sub>8</sub>), 110.4 (C<sub>Ph2</sub>), 99.2 (C<sub>Ph4</sub>), 61.7 (C<sub>9</sub>), 55.4 (C<sub>Me</sub>), 48.1 (C<sub>10</sub>); HRMS (APCI-TOF) *m/z*: [M]<sup>+</sup> Calcd for C<sub>28</sub>H<sub>19</sub>Cl<sub>3</sub>O<sub>2</sub>, 493.0523; Found, 493.0541.

## 2. Copies of NMR and HRMS Spectra for New Compounds

### a. Spectra of 3,5-Dinitrophenyl-9-anthracene (17)

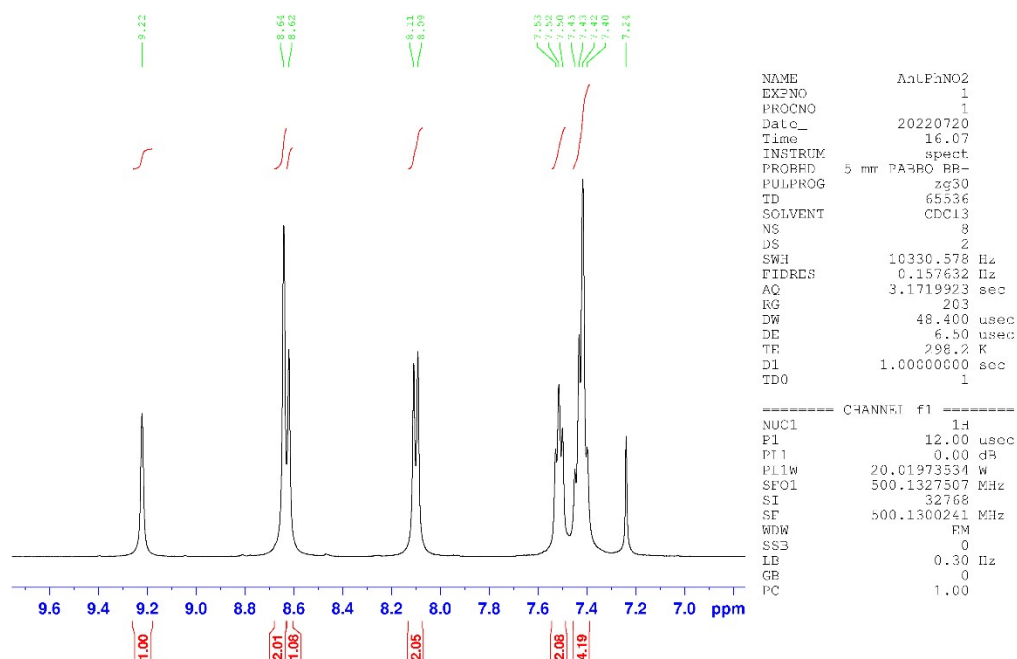

Fig. S1. <sup>1</sup>H NMR spectrum of dinitrophenylanthracene 17 in CDCl<sub>3</sub>.

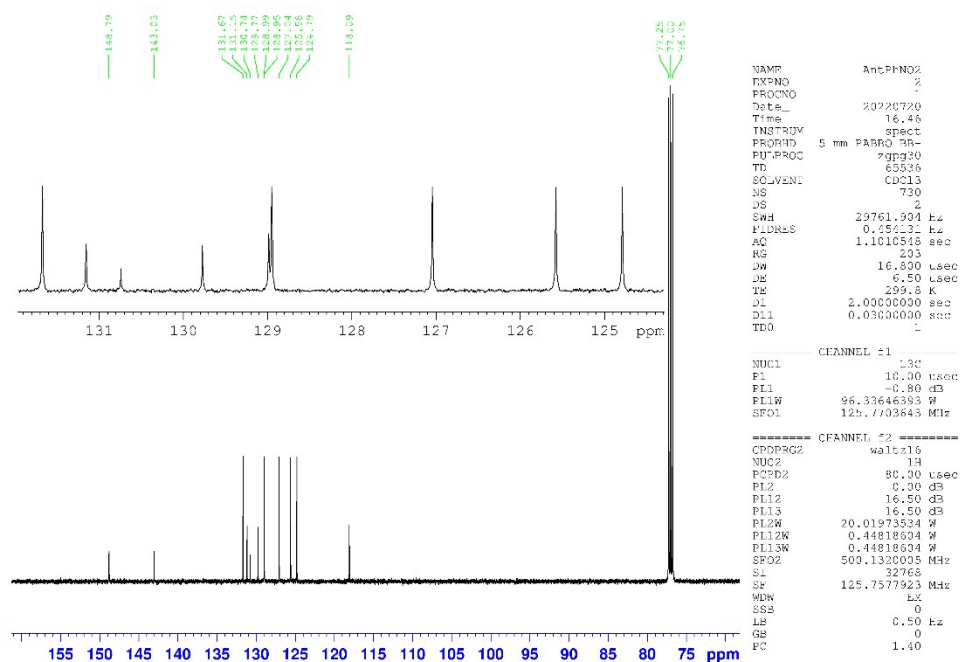

Fig. S2. <sup>13</sup>C NMR spectrum of dinitrophenylanthracene 17 in CDCl<sub>3</sub>.

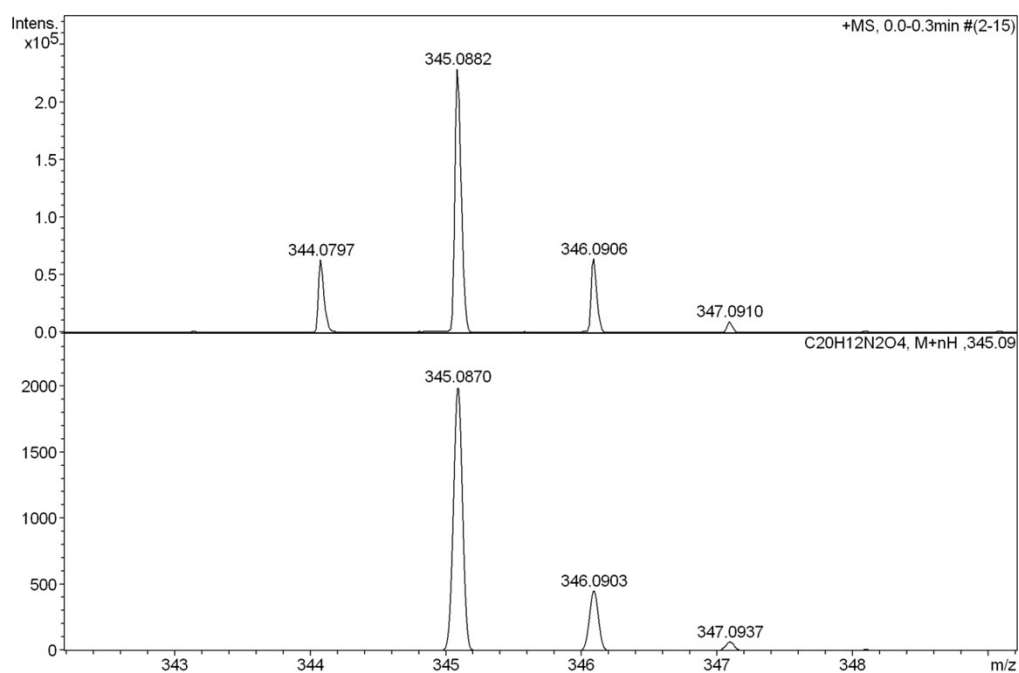

Fig. S3. HRMS spectrum of dinitrophenylanthracene **17** (APCI, positive). Top: obsd. Bottom: sim.

### b. Spectra of 9-(3,5-dinitrophenyl)triptycene (**12**)

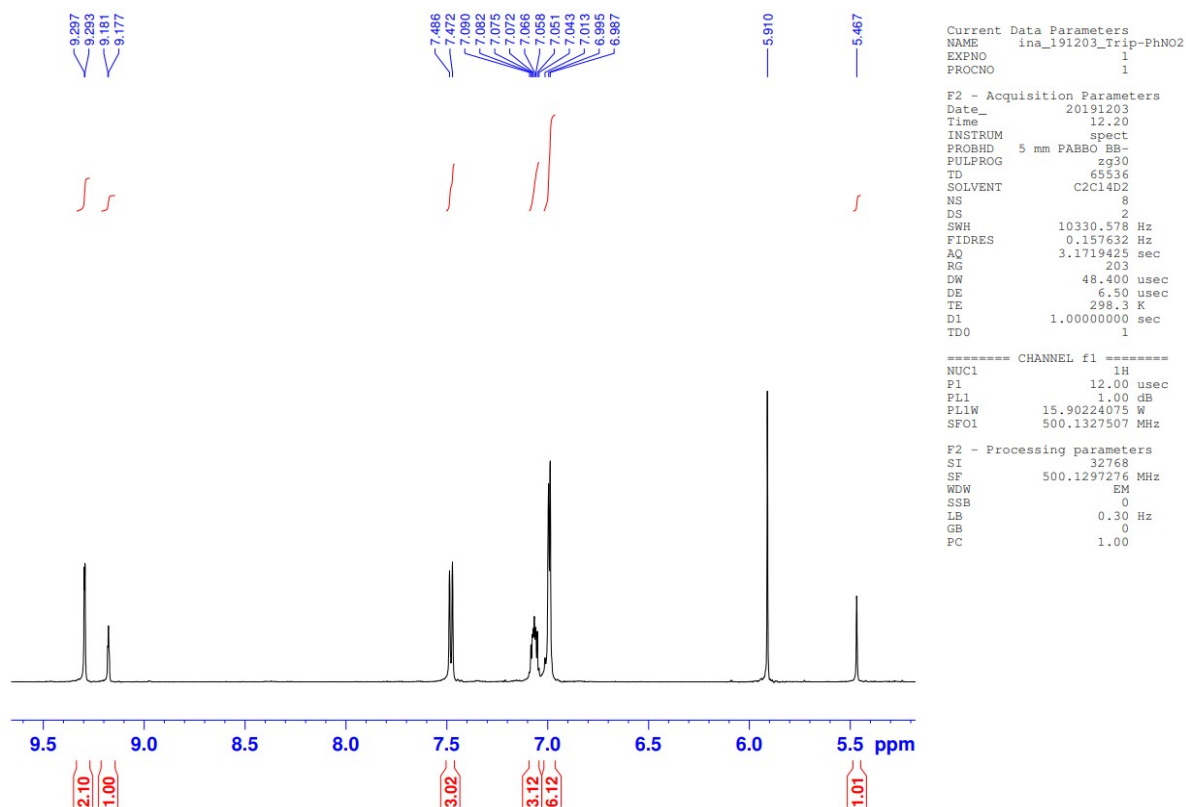

Fig. S4. <sup>1</sup>H NMR spectrum of dinitrophenyltriptycene **12** in C<sub>2</sub>Cl<sub>4</sub>D<sub>2</sub>.

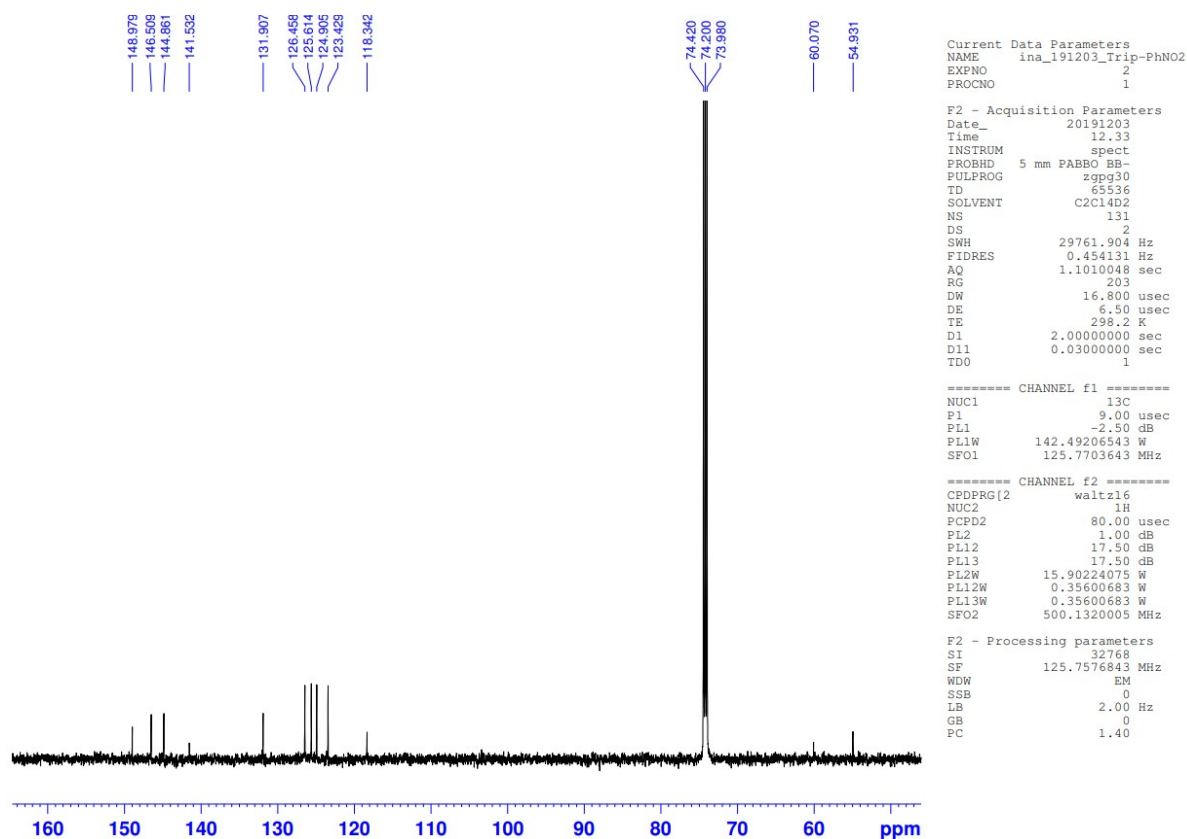

Fig. S5.  $^{13}\text{C}$  NMR spectrum of dinitrophenyltryptene **12** in  $\text{C}_2\text{Cl}_4\text{D}_2$ .

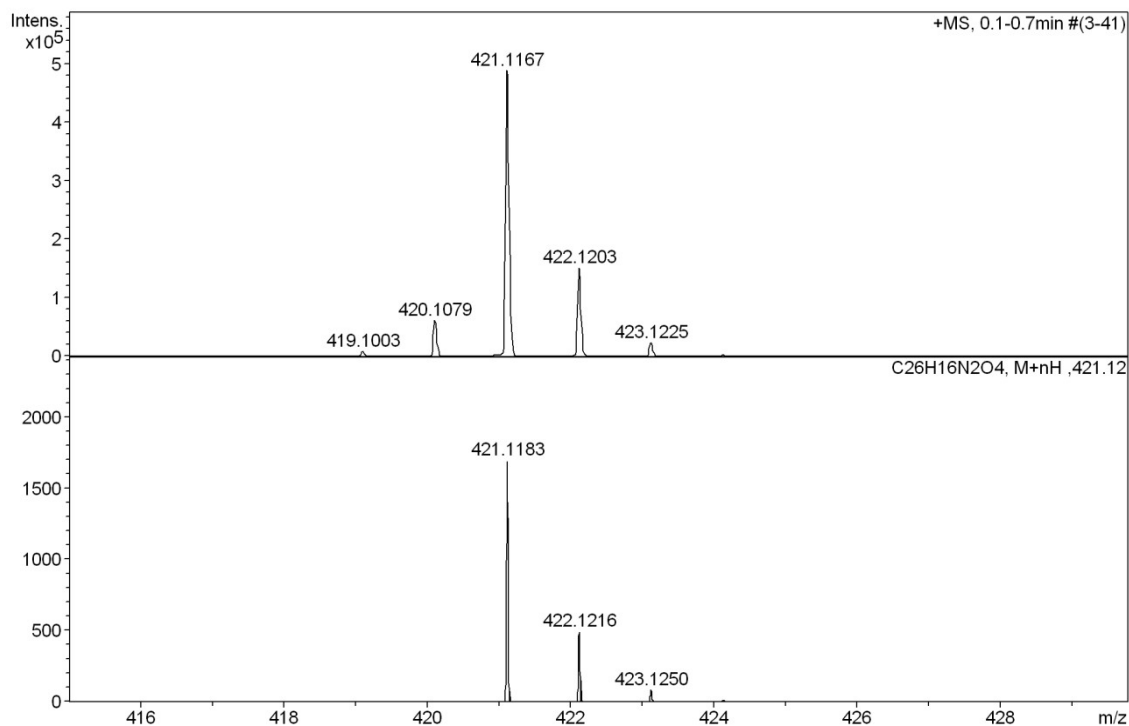

Fig. S6. HRMS spectrum of dinitrophenyltryptene **12** (APCI, positive). Top: obsd. Bottom: sim.

### c. Spectra of 9-(3,5-diaminophenyl)triptycene (13)

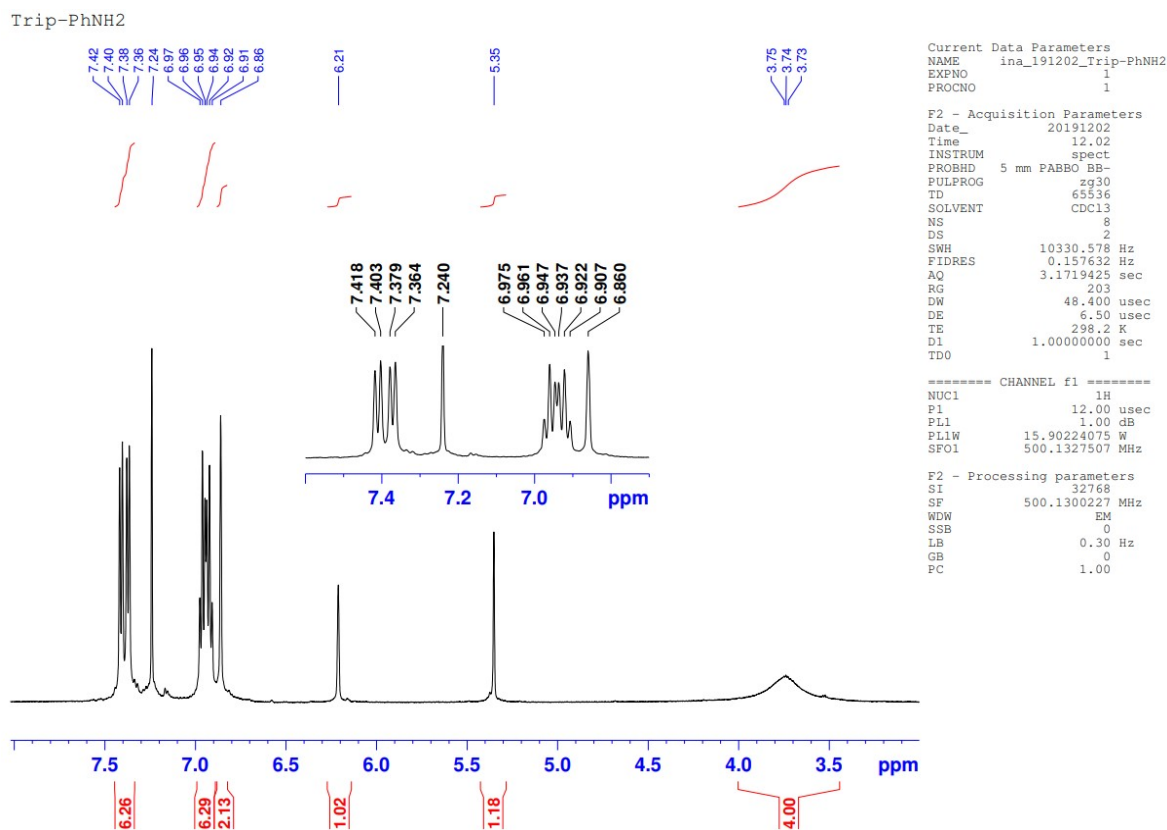

Fig. S7.  $^1\text{H}$  NMR spectrum of diaminophenyltriptycene **13** in  $\text{CDCl}_3$ .

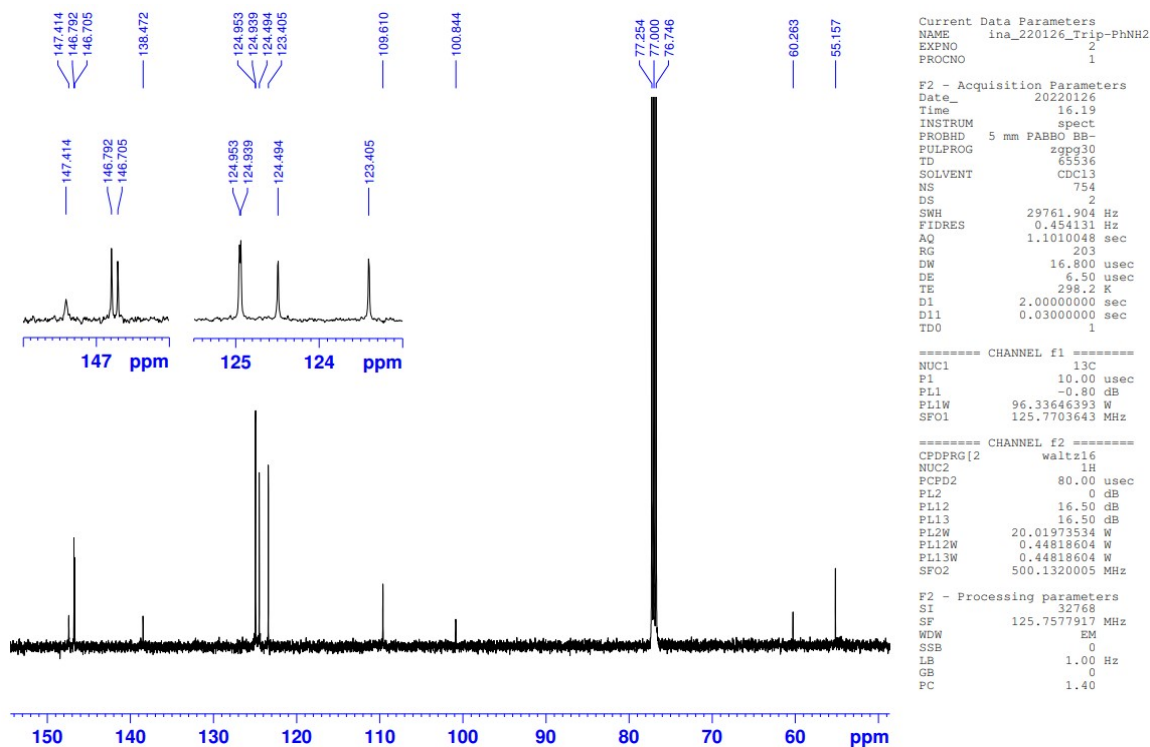

Fig. S8.  $^{13}\text{C}$  NMR spectrum of diaminophenyltriptycene **13** in  $\text{CDCl}_3$ .



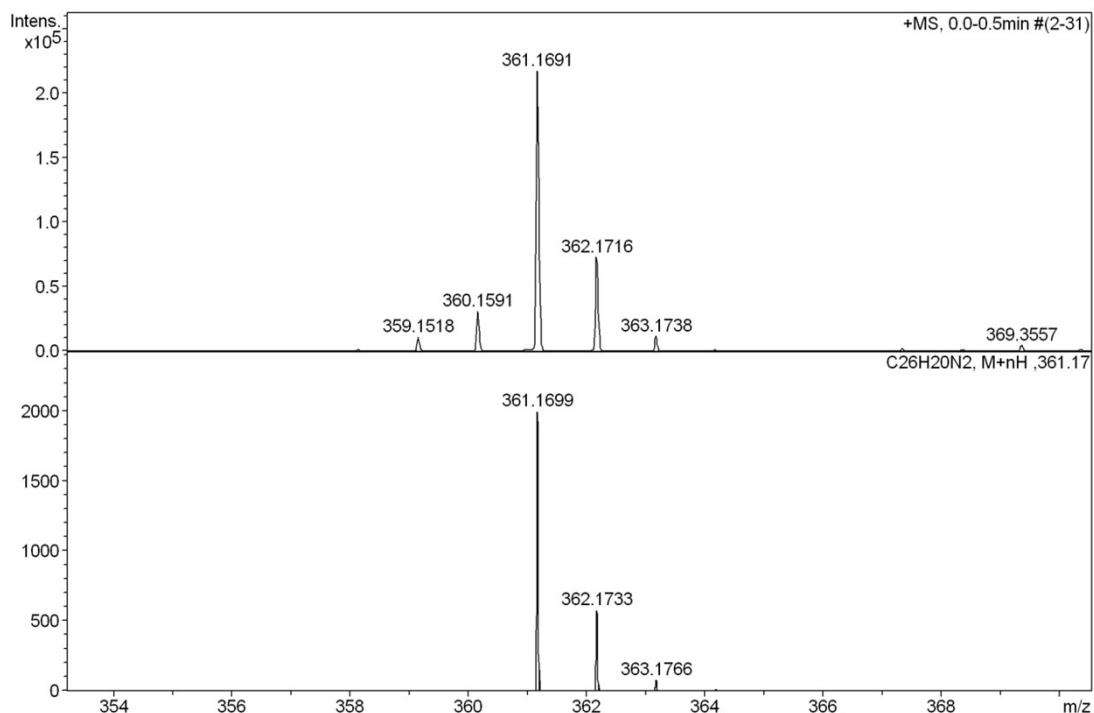

Fig. S9. HRMS spectrum of diaminophenyltryptene **13** (APCI, positive). Top: obsd. Bottom: sim.

#### d. Spectra of 1-Chloro-10-(3,5-dimethoxyphenyl)anthracene (**20**)

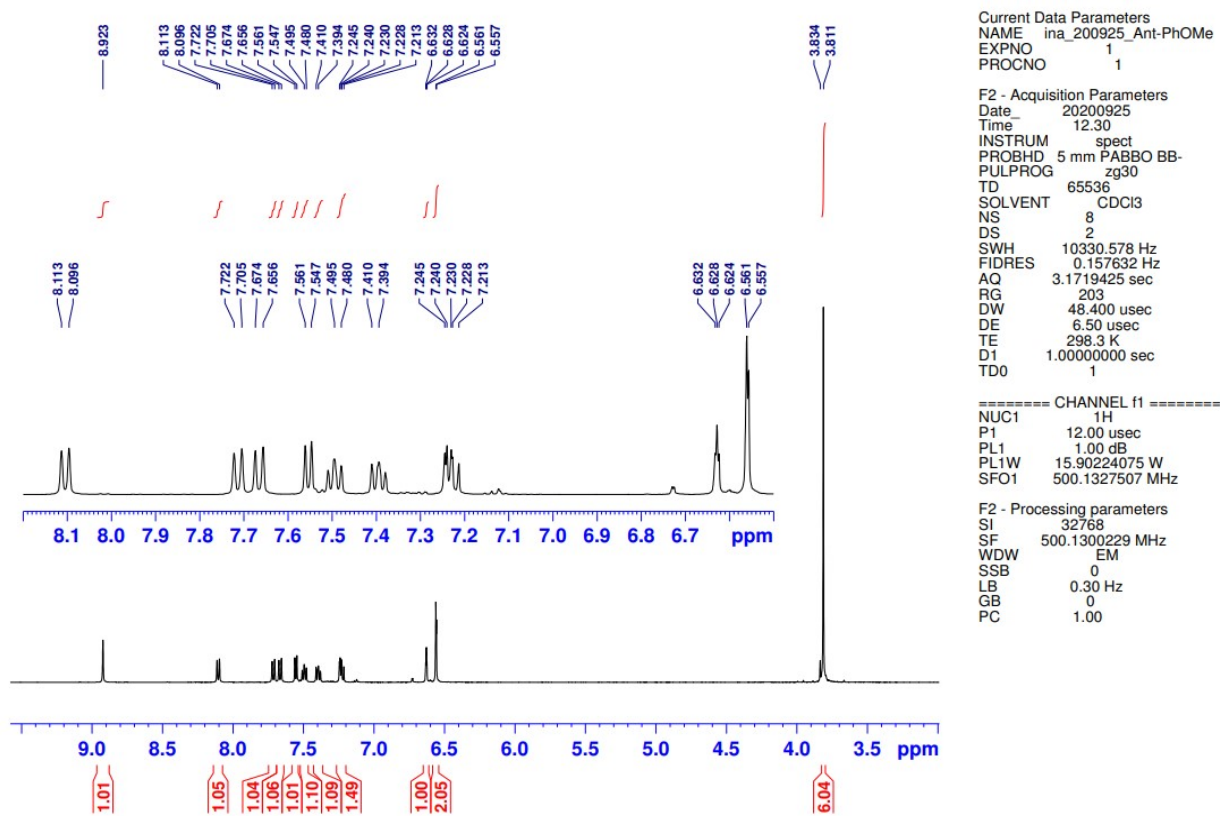

Fig. S10.  $^1\text{H}$  NMR spectrum of chloro(dimethoxyphenyl)anthracene **20** in  $\text{CDCl}_3$ .

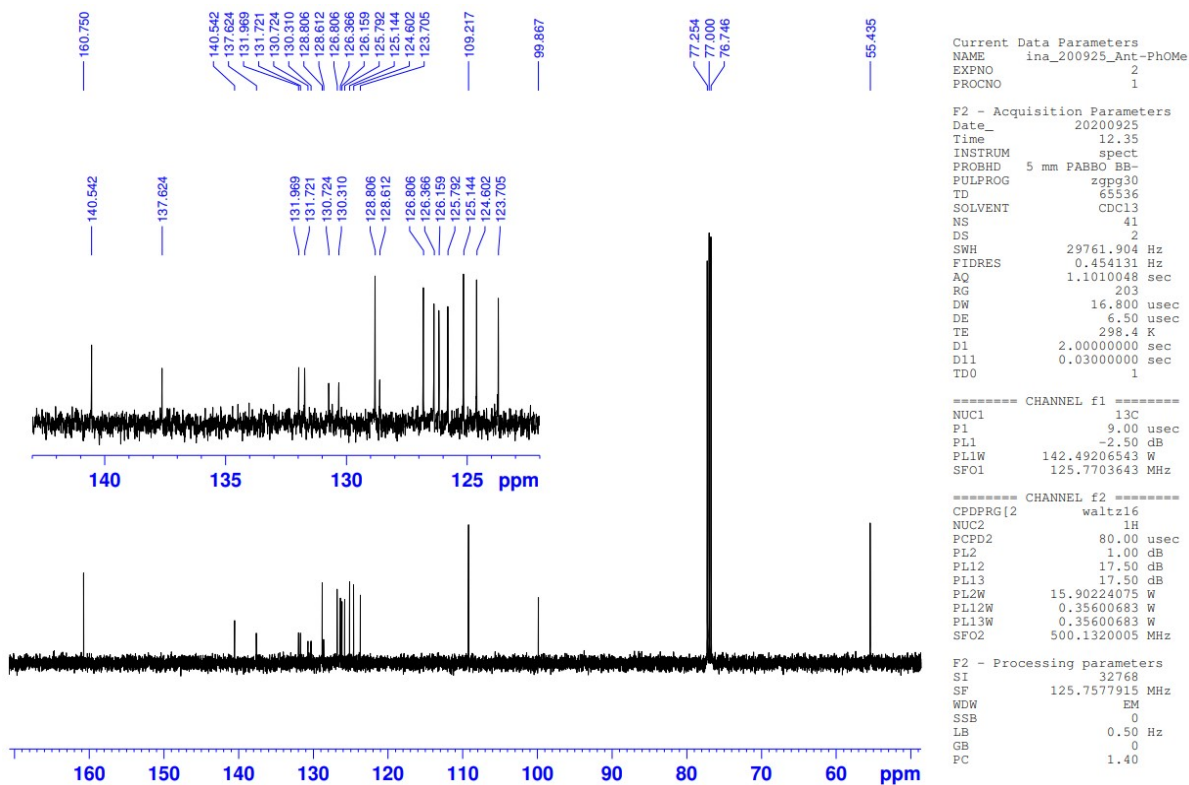

Fig. S11. <sup>13</sup>C NMR spectrum of chloro(dimethoxyphenyl)anthracene **20** in CDCl<sub>3</sub>.

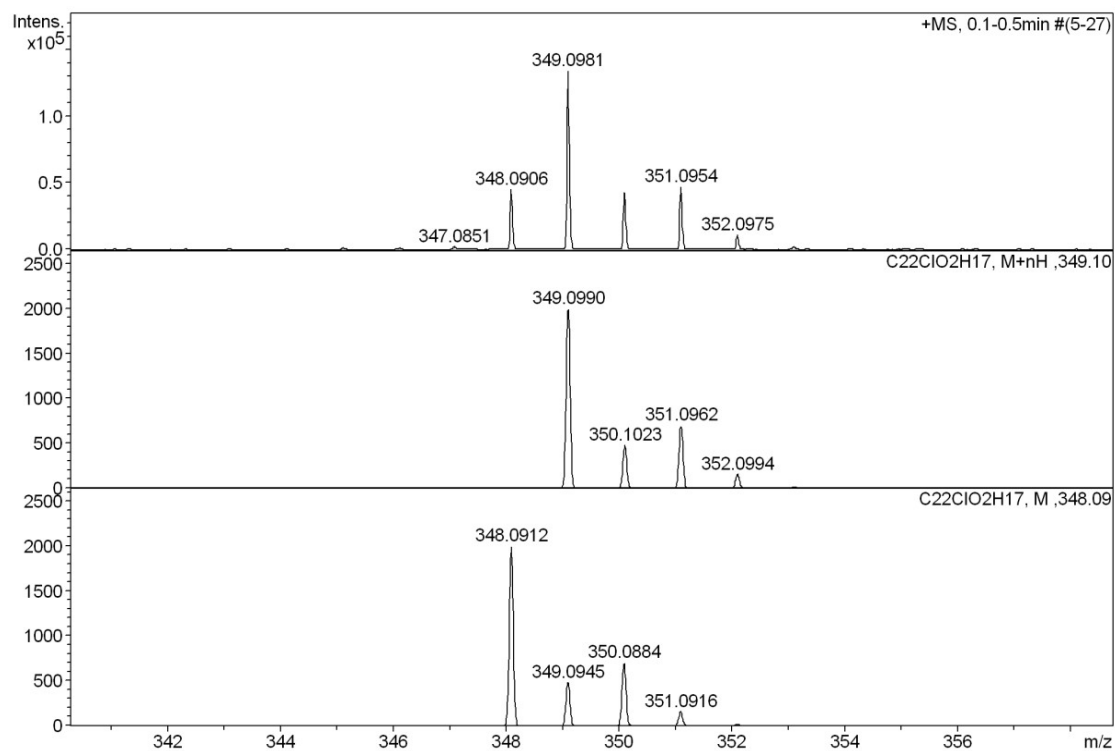

Fig. S12. HRMS spectrum of chloro(dimethoxyphenyl)anthracene **20** (APCI, positive). Top: obsd. Bottom: sim.

e. Spectra of 1,4,5-Trichloro-9-(3,5-dimethoxyphenyl)triptycene (14)

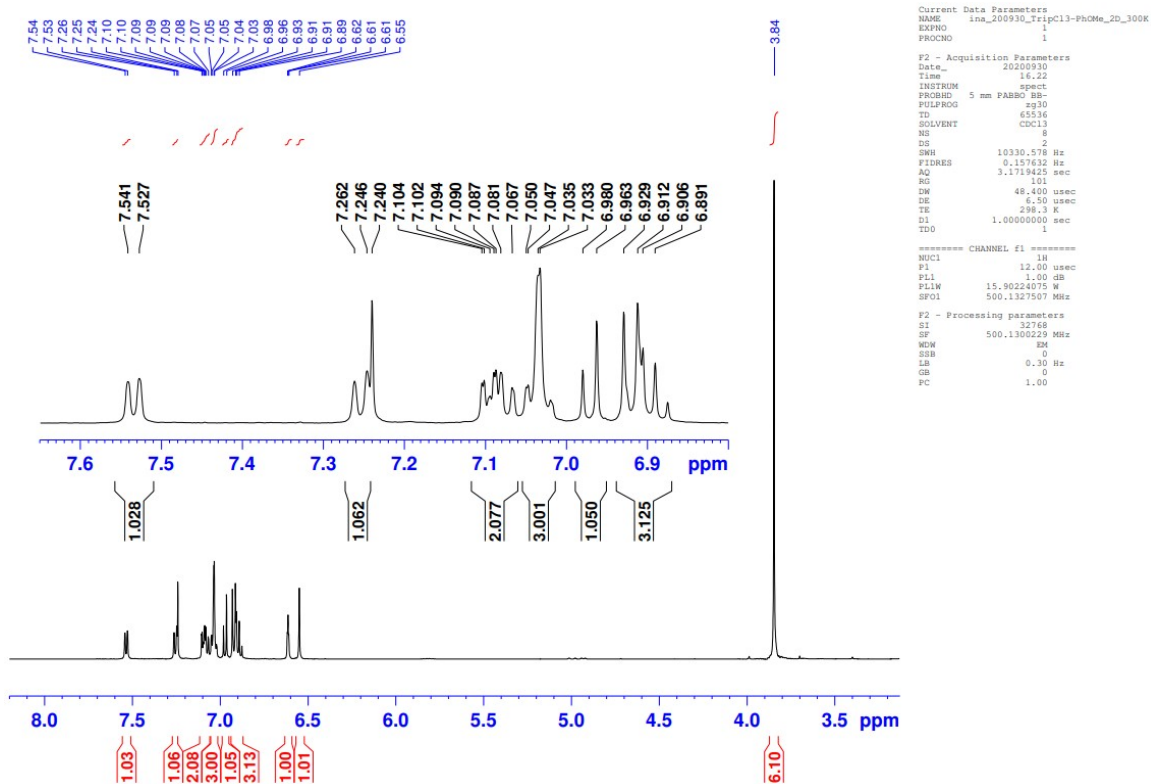

Fig. S13. <sup>1</sup>H NMR spectrum of trichloro(dimethoxyphenyl)triptycene 14 in CDCl<sub>3</sub>.

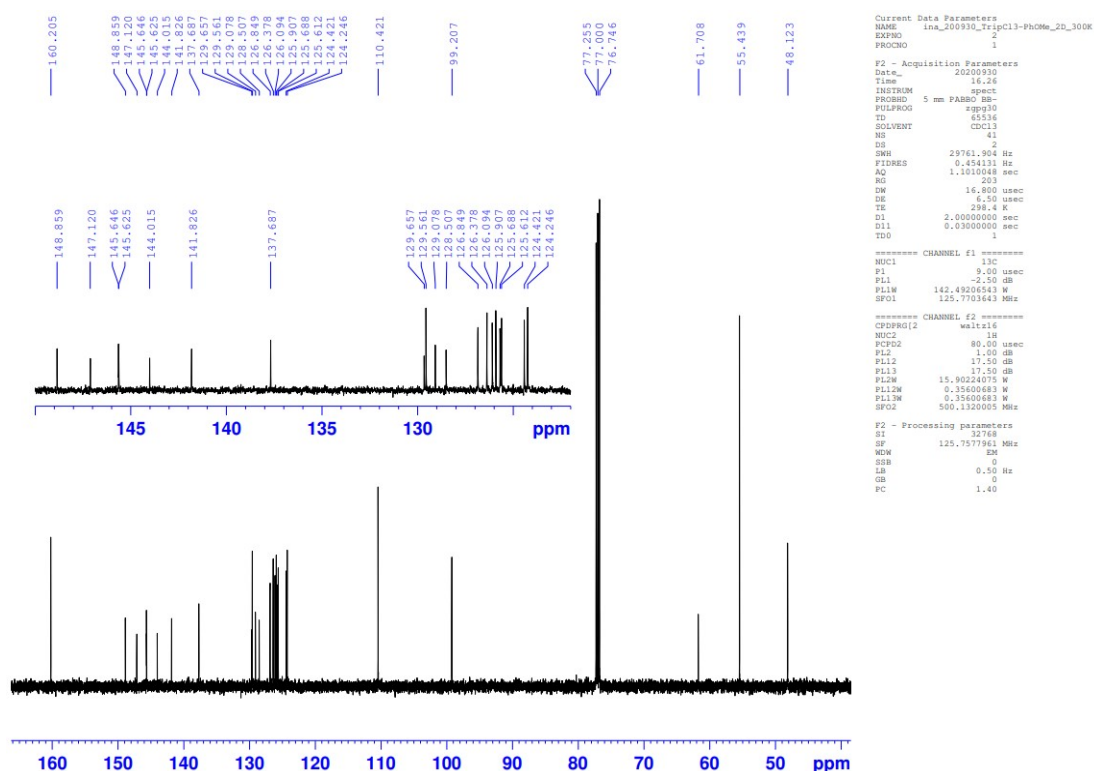

**Fig. S14.**  $^{13}\text{C}$  NMR spectrum of trichloro(dimethoxyphenyl)triptycene **14** in  $\text{CDCl}_3$ .

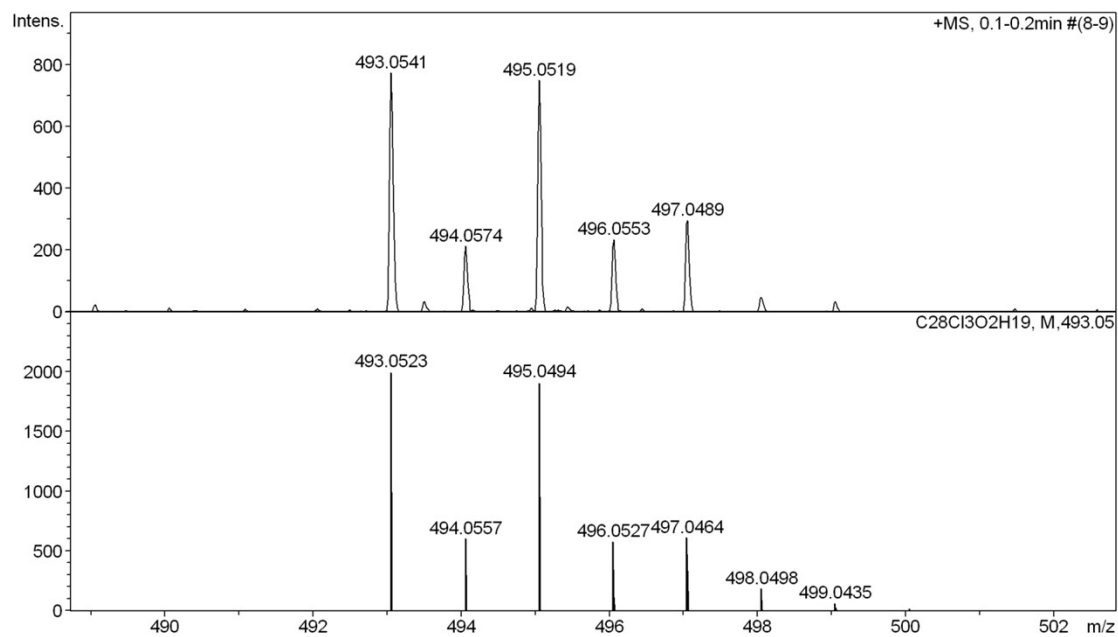

**Fig. S15.** HRMS spectrum of trichloro(dimethoxyphenyl)triptycene **14** (APCI, positive). Top: obsd. Bottom: sim.

### 3. Details of NMR Studies

#### 3-1. Temperature dependent $^1\text{H}$ NMR of dinitrotriptycene **12** and diaminotriptycene **13**

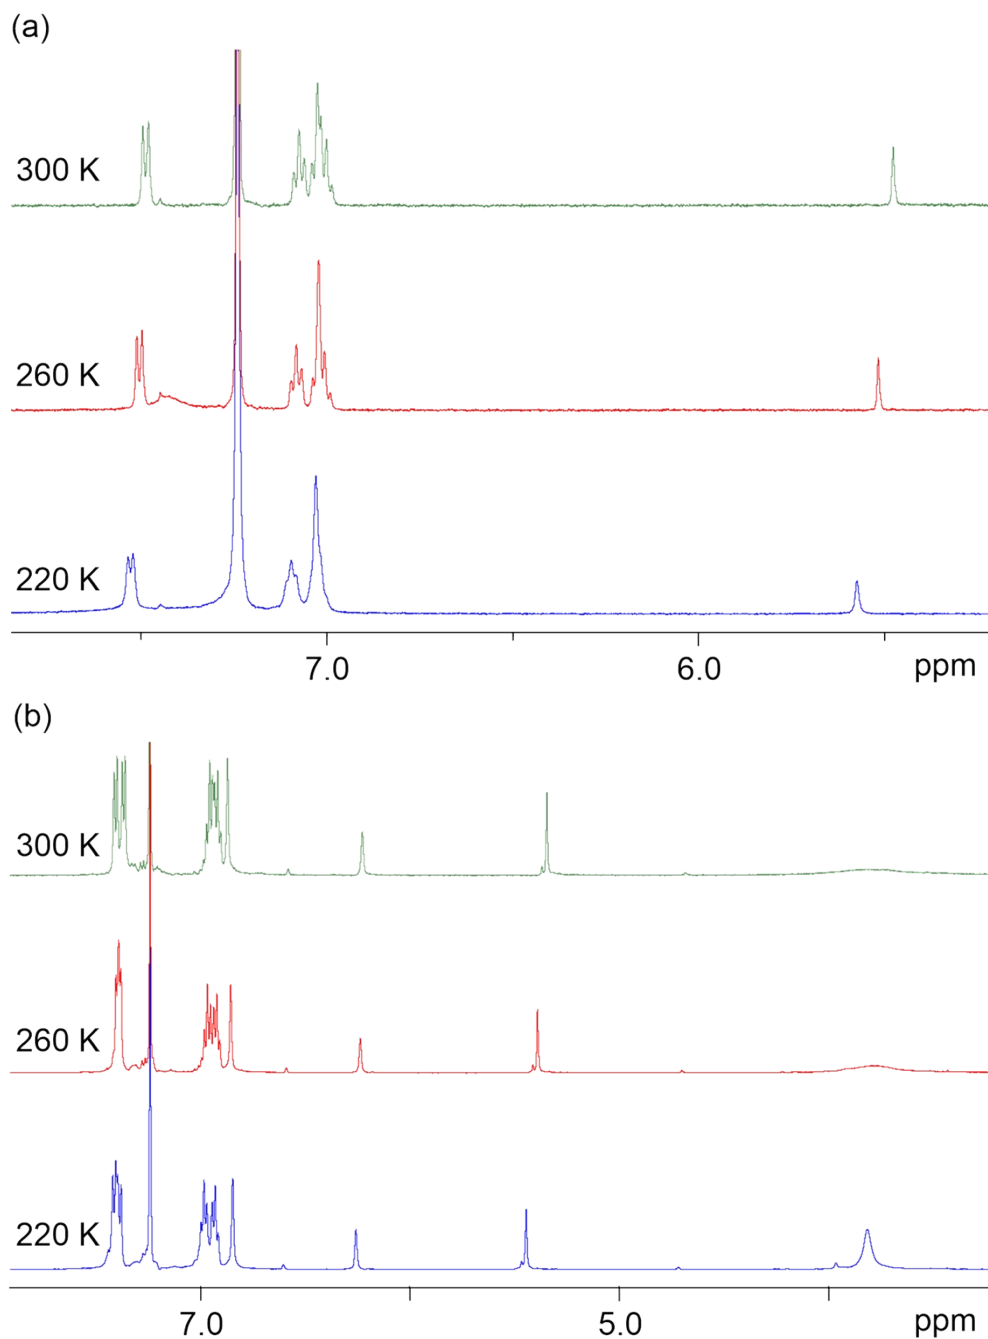

**Fig. S16.** Temperature dependent  $^1\text{H}$  NMR of (a) dinitrotriptycene **12** and (b) diaminotriptycene **13**.

### 3-2. Assignments of NMR signals of trichloro(dimethoxyphenyl)tritycene 14

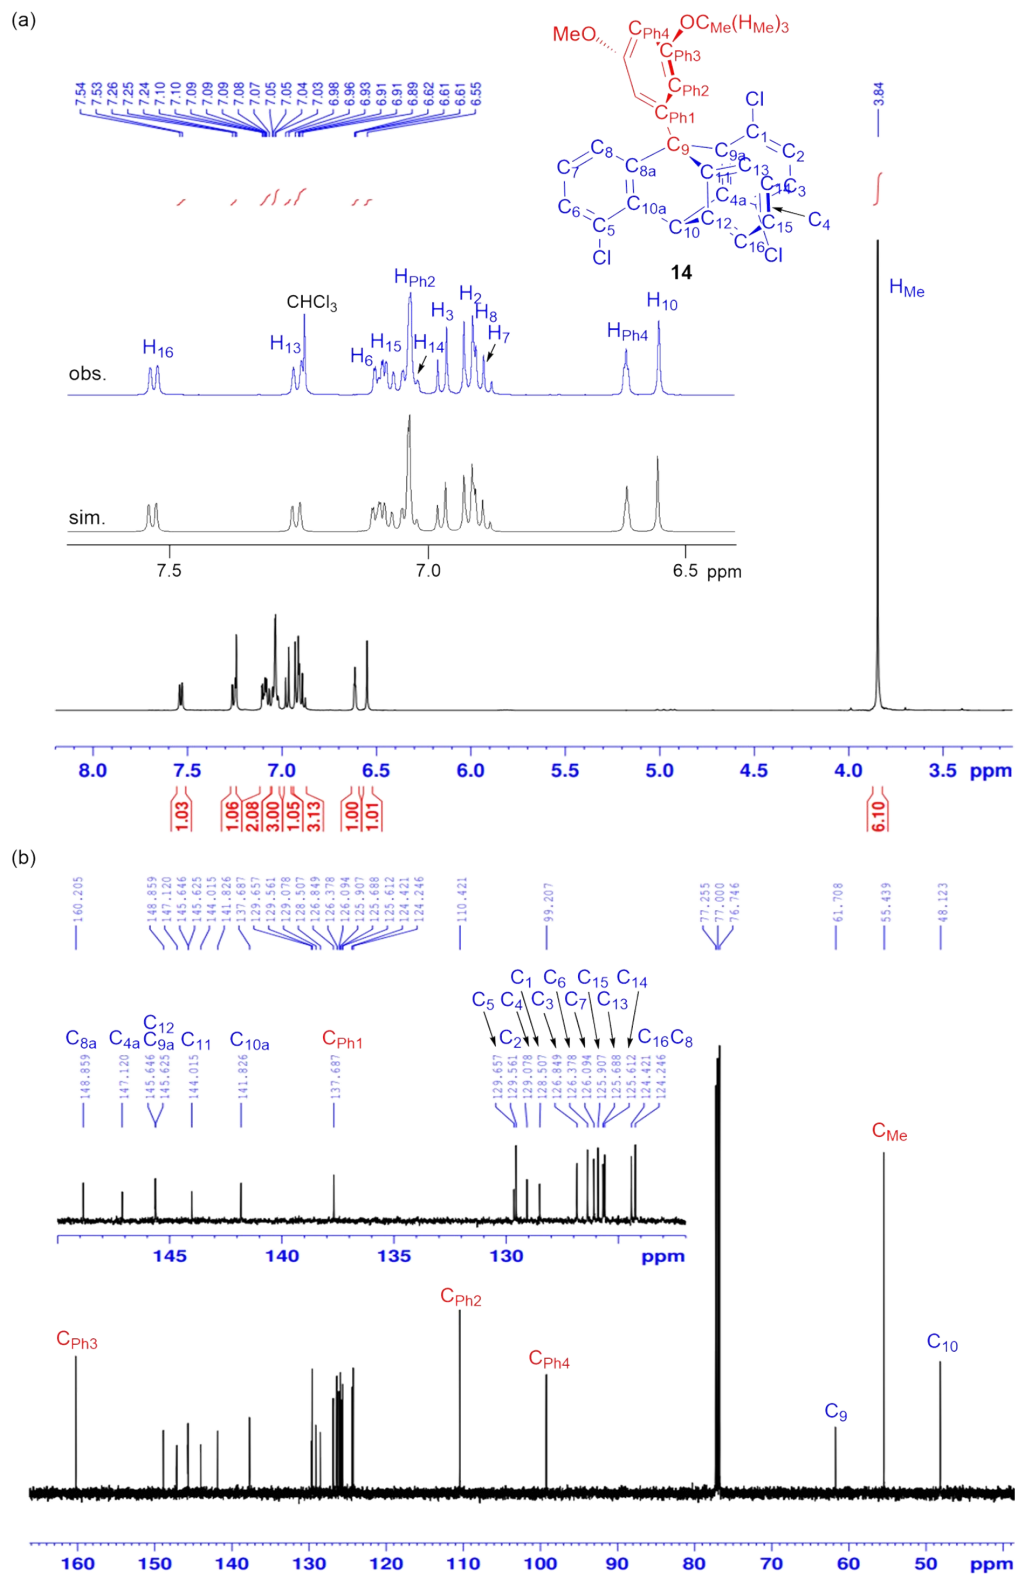

Fig. S17. NMR signals assignments for trichloro(dimethoxyphenyl)tritycene **14**: (a)  $^1\text{H}$  NMR (The simulation was carried out using parameters described in the synthesis section.), (b)  $^{13}\text{C}$  NMR.

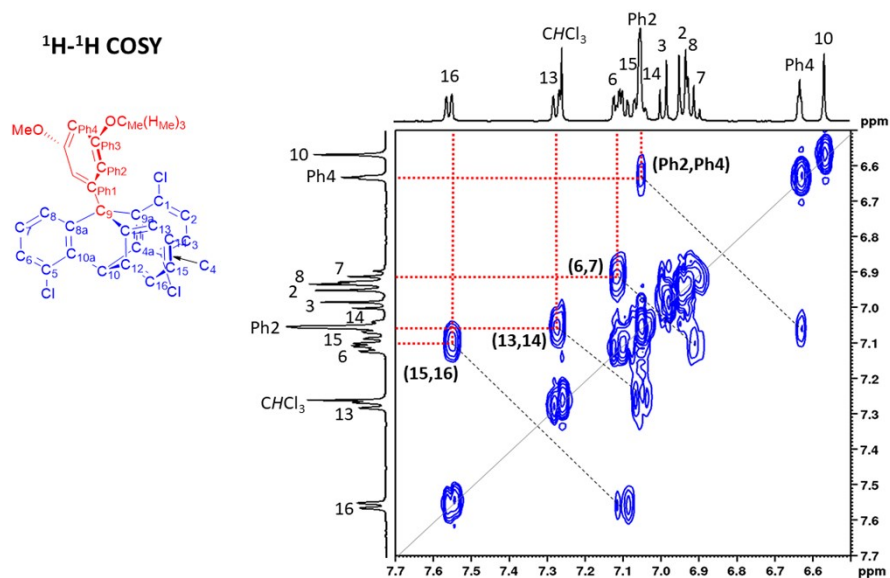

**Fig. S18.**  $^1\text{H}$ - $^1\text{H}$  COSY NMR spectrum of trichloro(dimethoxyphenyl)tritycene **14** for signals assignments.

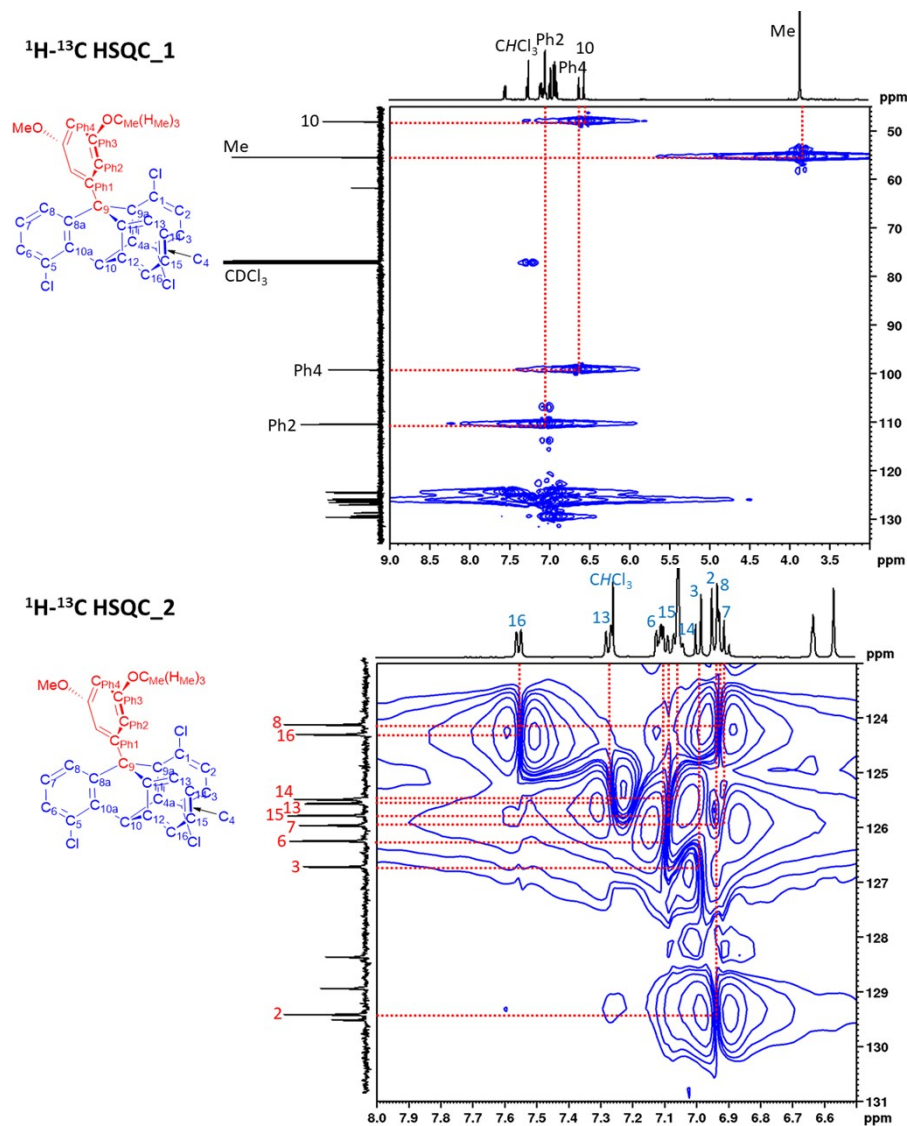

**Fig. S19.**  $^1\text{H}$ - $^{13}\text{C}$  HSQC NMR spectra of trichloro(dimethoxyphenyl)tritycene **14** for signals assignments.

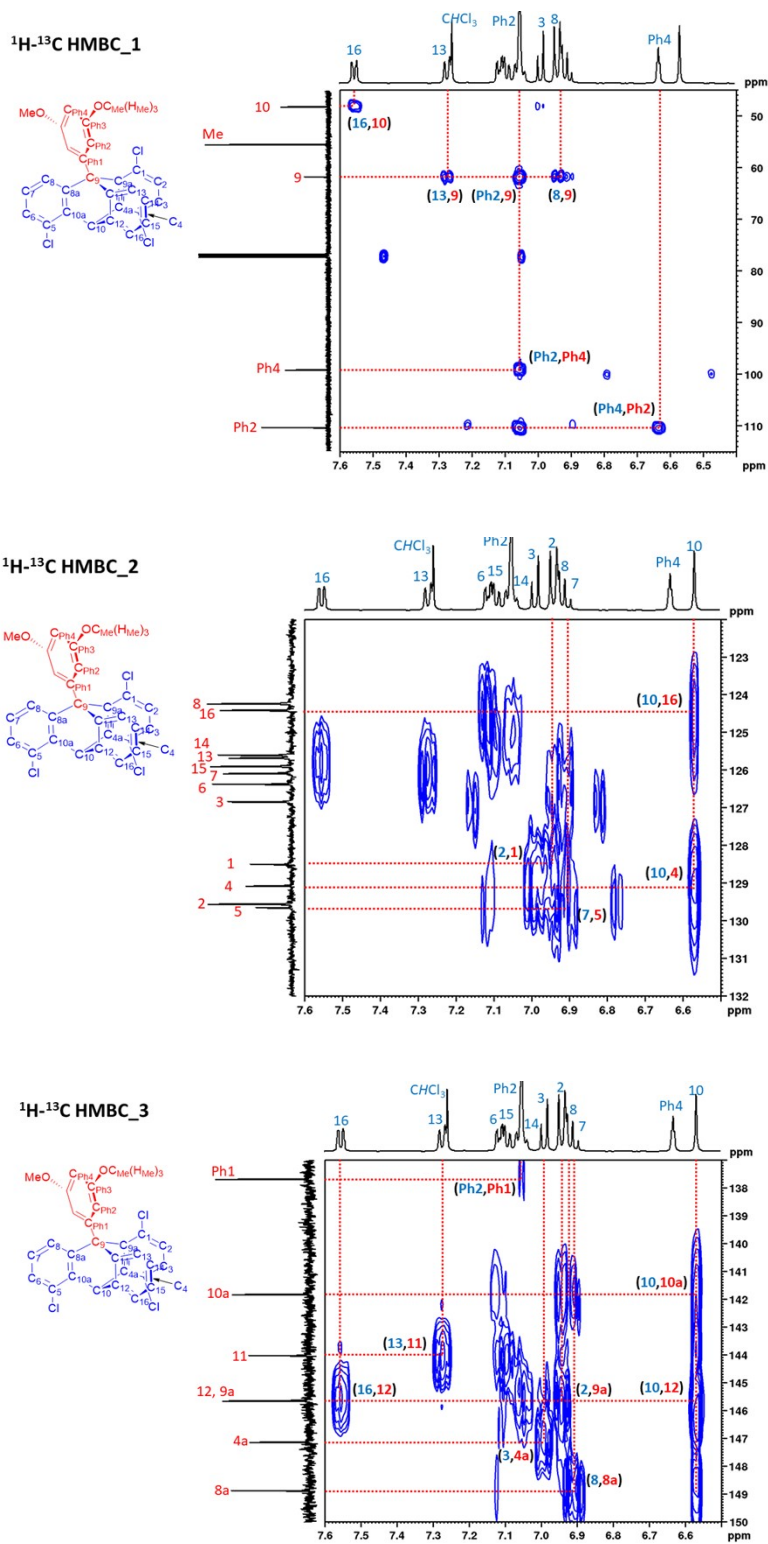

**Fig. S20.** <sup>1</sup>H-<sup>13</sup>C HMBC NMR spectra of trichloro(dimethoxyphenyl)tritycene **14** for signals assignments.



### 3-3. Analysis for the rotational dynamics in trichloro(dimethoxyphenyl)tritycene **14**

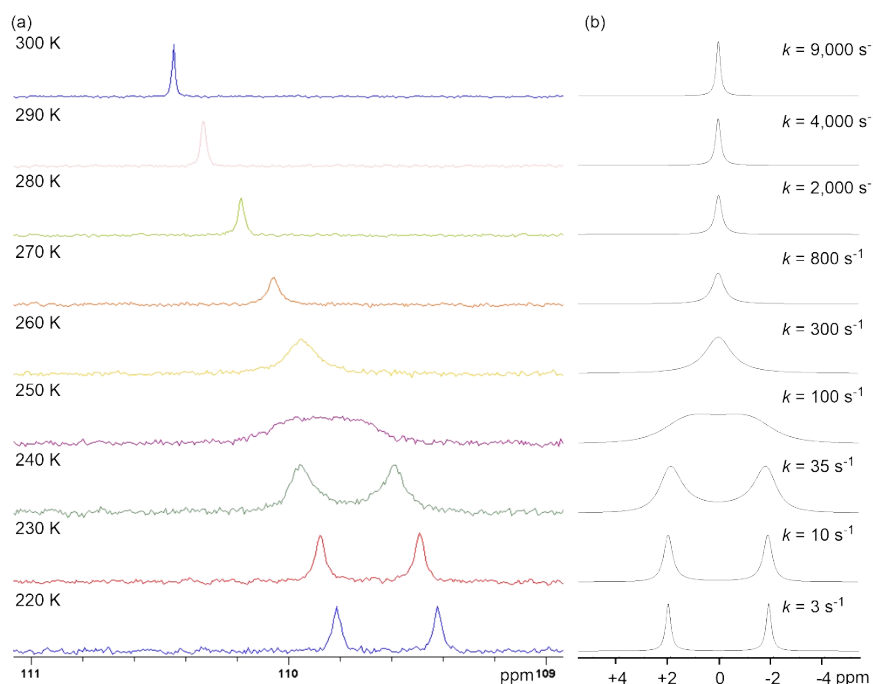

**Fig. S21.** Details of temperature dependent  $^{13}\text{C}$  NMR spectra of **14** (ortho-carbons of 3,5-dimethoxy-1-phenylene) (a) observed (b) simulation with exchange rates.

An activation energy for the ring flipping/rotation could be estimated the slope of an Eyring plot for temperature dependent exchange rates determined in **Fig. S21**. From the plots, the following parameters were determined (errors are shown as standard deviations):

$$\Delta H^\ddagger = 12.7 \pm 0.10\text{ kcal mol}^{-1}, \Delta S^\ddagger = 1.98 \pm 0.36\text{ cal mol}^{-1}\text{ K}^{-1}$$

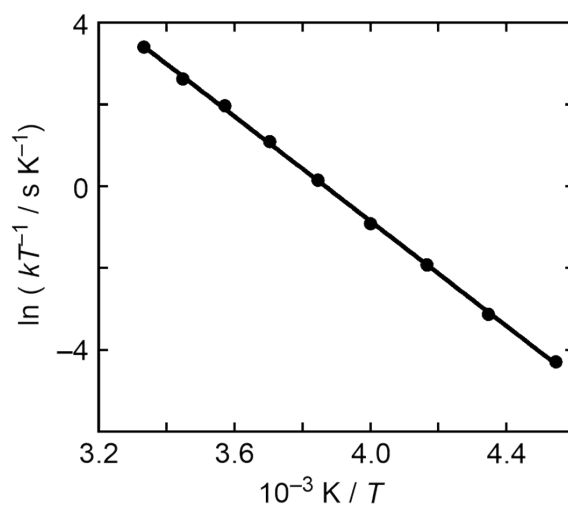

**Fig. S22.** Eyring plot for temperature dependent exchange rates for the rotation of the rotor in compound **11**.

## 4. Details of X-ray Crystallography

### 4-1. Crystal Data

**Table S1.** Crystal Data

| Compound                             | dinitrophenyltriptycene <b>12</b>                             | diaminophenyltriptycene <b>13</b>                            | trichloro(dimethoxyphenyl)triptycene <b>14</b>                 |                            |
|--------------------------------------|---------------------------------------------------------------|--------------------------------------------------------------|----------------------------------------------------------------|----------------------------|
| CCDC #                               | 2182983                                                       | 2182984                                                      | 2182985                                                        |                            |
| Empirical formula                    | C <sub>26</sub> H <sub>16</sub> N <sub>2</sub> O <sub>4</sub> | C <sub>26</sub> H <sub>20</sub> N <sub>2</sub>               | C <sub>28</sub> H <sub>19</sub> Cl <sub>3</sub> O <sub>2</sub> |                            |
| Temperature                          | 100 K                                                         | 100 K                                                        | 173 K                                                          |                            |
| Crystal shape & Color                | Prism, colorless                                              | Prism, colorless                                             | Prism, colorless                                               |                            |
| Crystal size                         | 0.250 x 0.210 x 0.080 mm <sup>3</sup>                         | 0.280 x 0.230 x 0.100 mm <sup>3</sup>                        | 0.370 x 0.220 x 0.170 mm <sup>3</sup>                          |                            |
| Formula weight / g mol <sup>-1</sup> | 420.41                                                        | 360.44                                                       | 493.78                                                         |                            |
| Crystal system                       | Orthorhombic                                                  | Triclinic                                                    | Orthorhombic                                                   |                            |
| Space group                          | <i>Pnma</i>                                                   | <i>P</i> -1                                                  | <i>Pca</i> 2 <sub>1</sub>                                      |                            |
| Z                                    | 4                                                             | 6                                                            | 8                                                              |                            |
| Calculated density                   | 1.480 Mg/m <sup>3</sup>                                       | 1.312 Mg/m <sup>3</sup>                                      | 1.419 Mg/m <sup>3</sup>                                        |                            |
| Cell parameter                       | <i>a</i>                                                      | 17.026(3) Å                                                  | 8.58090(10) Å                                                  | 15.5816(4) Å               |
|                                      | <i>b</i>                                                      | 13.546(2) Å                                                  | 16.4594(3) Å                                                   | 9.3605(2) Å                |
|                                      | <i>c</i>                                                      | 8.1803(14) Å                                                 | 20.4778(4) Å                                                   | 31.6875(8) Å               |
|                                      | $\alpha$                                                      | 90°                                                          | 105.1070(10)°                                                  | 90°                        |
|                                      | $\beta$                                                       | 90°                                                          | 97.6730(10)°                                                   | 90°                        |
|                                      | $\gamma$                                                      | 90°                                                          | 96.1400(10)°                                                   | 90°                        |
|                                      | <i>V</i>                                                      | 1886.7(6) Å <sup>3</sup>                                     | 2736.72(8) Å <sup>3</sup>                                      | 4621.67(19) Å <sup>3</sup> |
| F(000)                               | 872                                                           | 1140                                                         | 2032                                                           |                            |
| Absorption coefficient               | 0.829 mm <sup>-1</sup>                                        | 0.591 mm <sup>-1</sup>                                       | 3.784 mm <sup>-1</sup>                                         |                            |
| $\theta$ range for collection        | 8.890 to 74.521° (CuK $\alpha$ )                              | 2.267 to 72.424° (CuK $\alpha$ )                             | 2.789 to 74.596° (CuK $\alpha$ )                               |                            |
| Index ranges                         | -20 ≤ <i>h</i> ≤ 21, -16 ≤ <i>k</i> ≤ 16, -9 ≤ <i>l</i> ≤ 8   | -10 ≤ <i>h</i> ≤ 8, -20 ≤ <i>k</i> ≤ 20, -25 ≤ <i>l</i> ≤ 25 | -19 ≤ <i>h</i> ≤ 19, -11 ≤ <i>k</i> ≤ 11, -39 ≤ <i>l</i> ≤ 38  |                            |
| Reflections collected                | 15105                                                         | 23640                                                        | 38013                                                          |                            |
| Independent reflections              | 1914 [R(int) = 0.0432]                                        | 10346 [R(int) = 0.0302]                                      | 8907 [R(int) = 0.0508]                                         |                            |
| Completeness                         | 95.4 %                                                        | 97.6 %                                                       | 99.9 %                                                         |                            |
| Goodness-of-fit on F <sup>2</sup>    | 1.054                                                         | 1.027                                                        | 1.090                                                          |                            |
| Final R indices [I > 2σ(I)]          | R1 = 0.0393, wR2 = 0.0964                                     | R1 = 0.0467, wR2 = 0.1175                                    | R1 = 0.0600, wR2 = 0.1566                                      |                            |
| R indices (all data)                 | R1 = 0.0394, wR2 = 0.0965                                     | R1 = 0.0539, wR2 = 0.1225                                    | R1 = 0.0638, wR2 = 0.1590                                      |                            |

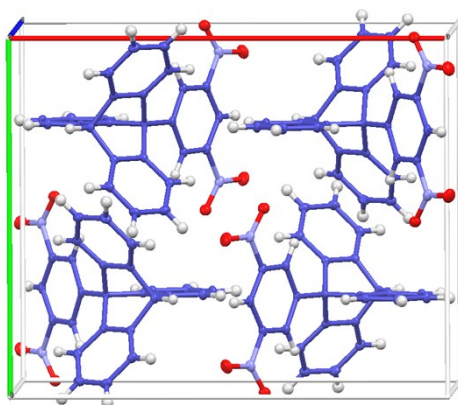

**Fig. S23.** Crystal packing structure of dinitrophenyltriptycene **12**.

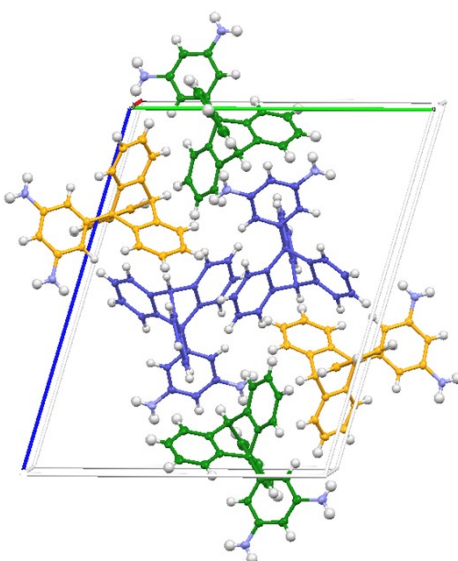

**Fig. S24.** Crystal packing structure of diaminophenyltriptycene **13**.

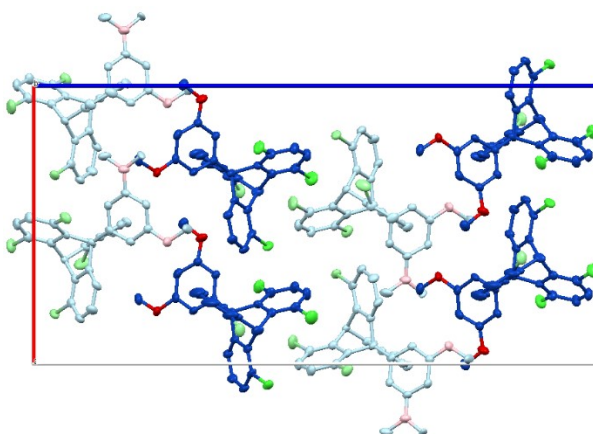

**Fig. S25.** Crystal packing structure of trichloro(dimethoxyphenyl)triptycene **14**.

## 5. Details of DFT Calculations

All calculations were carried out using Gaussian 16 (Revision C.01) program packages<sup>S1</sup> at the Research Center for Computational Science, Okazaki, Japan. All structural optimizations in this study were carried out using Opt=tight option that tightens the cutoffs on forces and step size.

S1: Gaussian 16, Revision C.01,

M. J. Frisch, G. W. Trucks, H. B. Schlegel, G. E. Scuseria, M. A. Robb, J. R. Cheeseman, G. Scalmani, V. Barone, G. A. Petersson, H. Nakatsuji, X. Li, M. Caricato, A. V. Marenich, J. Bloino, B. G. Janesko, R. Gomperts, B. Mennucci, H. P. Hratchian, J. V. Ortiz, A. F. Izmaylov, J. L. Sonnenberg, D. Williams-Young, F. Ding, F. Lipparini, F. Egidi, J. Goings, B. Peng, A. Petrone, T. Henderson, D. Ranasinghe, V. G. Zakrzewski, J. Gao, N. Rega, G. Zheng, W. Liang, M. Hada, M. Ehara, K. Toyota, R. Fukuda, J. Hasegawa, M. Ishida, T. Nakajima, Y. Honda, O. Kitao, H. Nakai, T. Vreven, K. Throssell, J. A. Montgomery, Jr., J. E. Peralta, F. Ogliaro, M. J. Bearpark, J. J. Heyd, E. N. Brothers, K. N. Kudin, V. N. Staroverov, T. A. Keith, R. Kobayashi, J. Normand, K. Raghavachari, A. P. Rendell, J. C. Burant, S. S. Iyengar, J. Tomasi, M. Cossi, J. M. Millam, M. Klene, C. Adamo, R. Cammi, J. W. Ochterski, R. L. Martin, K. Morokuma, O. Farkas, J. B. Foresman, and D. J. Fox, Gaussian, Inc., Wallingford CT, 2019.

**Table S2.** Calculated NPA Charges of *peri*-Hydrogens on Compounds **12** and **13**

| Level of theory                                   | <b>12</b>        |                  |                   | <b>13</b>        |                  |                   |
|---------------------------------------------------|------------------|------------------|-------------------|------------------|------------------|-------------------|
|                                                   | H1 <sup>b)</sup> | H8 <sup>b)</sup> | H13 <sup>b)</sup> | H1 <sup>b)</sup> | H8 <sup>b)</sup> | H13 <sup>b)</sup> |
| $\omega$ 97XD/6-311++G(d,p)                       | 0.212            | 0.124            | 0.124             | 0.226            | 0.222            | 0.221             |
| PCM <sup>a)</sup> - $\omega$ 97XD/6-311+12+G(d,p) | 0.217            | 0.219            | 0.219             | 0.227            | 0.226            | 0.225             |
| B3LYP-D3/6-311++G(d,p)                            | 0.208            | 0.211            | 0.211             | 0.221            | 0.218            | 0.216             |
| PCM <sup>a)</sup> -B3LYP-D3/6-311++G(d,p)         | 0.213            | 0.215            | 0.215             | 0.222            | 0.221            | 0.220             |

<sup>a)</sup> in chloroform.

<sup>b)</sup> The atom numbering was shown below:

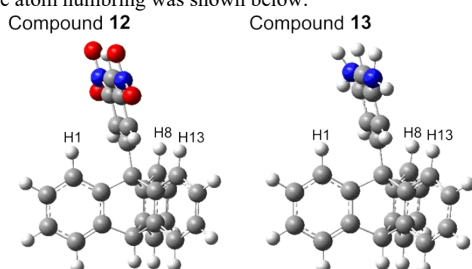

**Table S2.** Optimized Structural Coordinate and its Total Energy for

**12** at  $\omega$ 97XD/6-311++G(d,p) level

total energy: HF= -1410.4956193 hartree (NImag = 0)

| Center Number | Atomic Number | Atomic Type | Coordinates (Angstroms) |           |           |
|---------------|---------------|-------------|-------------------------|-----------|-----------|
|               |               |             | X                       | Y         | Z         |
| 1             | 6             | 0           | -0.079541               | 0.000003  | 2.479178  |
| 2             | 6             | 0           | -0.986332               | 0.000001  | 1.429630  |
| 3             | 6             | 0           | -0.645825               | 0.000000  | -0.081809 |
| 4             | 6             | 0           | -2.353078               | 0.000001  | 1.704943  |
| 5             | 6             | 0           | -3.202734               | 0.000000  | 0.459739  |
| 6             | 6             | 0           | -0.544440               | 0.000004  | 3.793876  |
| 7             | 6             | 0           | -1.905709               | 0.000004  | 4.059334  |
| 8             | 6             | 0           | -2.818731               | 0.000002  | 3.007264  |
| 9             | 6             | 0           | -1.409114               | -1.197600 | -0.700884 |
| 10            | 6             | 0           | -2.769251               | -1.201041 | -0.364520 |
| 11            | 6             | 0           | -3.619898               | -2.175173 | -0.851472 |
| 12            | 6             | 0           | -0.938596               | -2.133383 | -1.609267 |
| 13            | 6             | 0           | -1.797045               | -3.115435 | -2.105168 |
| 14            | 6             | 0           | -3.125699               | -3.152045 | -1.714173 |
| 15            | 6             | 0           | -1.409114               | 1.197598  | -0.700886 |
| 16            | 6             | 0           | -2.769252               | 1.201040  | -0.364522 |
| 17            | 6             | 0           | -3.619899               | 2.175171  | -0.851476 |
| 18            | 6             | 0           | -0.938597               | 2.133380  | -1.609271 |
| 19            | 6             | 0           | -1.797046               | 3.115431  | -2.105173 |
| 20            | 6             | 0           | -3.125700               | 3.152041  | -1.714179 |
| 21            | 6             | 0           | 0.865050                | 0.000000  | -0.221371 |
| 22            | 6             | 0           | 1.586235                | -1.193020 | -0.175689 |
| 23            | 6             | 0           | 1.586235                | 1.193021  | -0.175689 |

|    |   |   |           |           |           |
|----|---|---|-----------|-----------|-----------|
| 24 | 6 | 0 | 2.971103  | -1.170741 | -0.180888 |
| 25 | 6 | 0 | 2.971104  | 1.170741  | -0.180889 |
| 26 | 6 | 0 | 3.704427  | -0.000000 | -0.197523 |
| 27 | 7 | 0 | 3.698403  | -2.458759 | -0.153289 |
| 28 | 7 | 0 | 3.698403  | 2.458759  | -0.153291 |
| 29 | 1 | 0 | 0.988517  | 0.000003  | 2.299096  |
| 30 | 1 | 0 | -4.272002 | 0.000000  | 0.671843  |
| 31 | 1 | 0 | 0.167756  | 0.000005  | 4.610922  |
| 32 | 1 | 0 | -2.259792 | 0.000005  | 5.083835  |
| 33 | 1 | 0 | -3.885830 | 0.000002  | 3.203315  |
| 34 | 1 | 0 | -4.670005 | -2.163369 | -0.578834 |
| 35 | 1 | 0 | 0.083019  | -2.110777 | -1.965881 |
| 36 | 1 | 0 | -1.415766 | -3.848989 | -2.806034 |
| 37 | 1 | 0 | -3.786185 | -3.920615 | -2.098712 |
| 38 | 1 | 0 | -4.670006 | 2.163366  | -0.578838 |
| 39 | 1 | 0 | 0.083018  | 2.110774  | -1.965884 |
| 40 | 1 | 0 | -1.415767 | 3.848984  | -2.806041 |
| 41 | 1 | 0 | -3.786187 | 3.920611  | -2.098719 |
| 42 | 1 | 0 | 1.088930  | -2.148857 | -0.097766 |
| 43 | 1 | 0 | 1.088931  | 2.148857  | -0.097767 |
| 44 | 1 | 0 | 4.784859  | -0.000000 | -0.203380 |
| 45 | 8 | 0 | 4.909932  | -2.414016 | -0.120315 |
| 46 | 8 | 0 | 3.035540  | -3.475234 | -0.167170 |
| 47 | 8 | 0 | 4.909932  | 2.414016  | -0.120319 |
| 48 | 8 | 0 | 3.035540  | 3.475234  | -0.167170 |

**Table S3.** Optimized Structural Coordinate and its Total Energy for **13** at  $\omega$ 97XD/6-311++G(d,p) level

total energy: HF= -1112.2286987 hartree (NImag = 0)

| Center Number | Atomic Number | Atomic Type | Coordinates (Angstroms) |           |           |
|---------------|---------------|-------------|-------------------------|-----------|-----------|
|               |               |             | X                       | Y         | Z         |
| 1             | 6             | 0           | 0.250090                | -0.008022 | 1.625753  |
| 2             | 6             | 0           | 1.277773                | -0.011010 | 2.557838  |
| 3             | 6             | 0           | 2.794403                | -0.006449 | 2.241438  |
| 4             | 6             | 0           | 0.968243                | -0.015867 | 3.916646  |
| 5             | 6             | 0           | 2.192512                | -0.013830 | 4.795183  |
| 6             | 6             | 0           | -1.074724               | -0.011797 | 2.059850  |
| 7             | 6             | 0           | -1.374739               | -0.018420 | 3.415101  |
| 8             | 6             | 0           | -0.345231               | -0.020079 | 4.352940  |
| 9             | 6             | 0           | 3.393478                | 1.186420  | 3.030406  |
| 10            | 6             | 0           | 3.025129                | 1.188824  | 4.382773  |
| 11            | 6             | 0           | 3.495022                | 2.157826  | 5.249448  |
| 12            | 6             | 0           | 4.321255                | 2.117656  | 2.588479  |
| 13            | 6             | 0           | 4.802268                | 3.093041  | 3.462992  |
| 14            | 6             | 0           | 4.376691                | 3.130666  | 4.781600  |
| 15            | 6             | 0           | 3.402119                | -1.198206 | 3.025938  |
| 16            | 6             | 0           | 3.033372                | -1.208909 | 4.378080  |
| 17            | 6             | 0           | 3.510002                | -2.177861 | 5.241166  |
| 18            | 6             | 0           | 4.337469                | -2.120472 | 2.580533  |
| 19            | 6             | 0           | 4.824904                | -3.095926 | 3.451444  |
| 20            | 6             | 0           | 4.398882                | -3.142305 | 4.769650  |
| 21            | 6             | 0           | 2.959255                | -0.003881 | 0.727681  |
| 22            | 6             | 0           | 2.912170                | 1.195758  | 0.021182  |
| 23            | 6             | 0           | 2.925058                | -1.203366 | 0.019696  |
| 24            | 6             | 0           | 2.901765                | 1.202502  | -1.376433 |
| 25            | 6             | 0           | 2.914727                | -1.209375 | -1.377222 |
| 26            | 6             | 0           | 2.922755                | -0.002989 | -2.073895 |
| 27            | 7             | 0           | 2.804355                | 2.410859  | -2.064647 |
| 28            | 7             | 0           | 2.940690                | -2.419531 | -2.069515 |
| 29            | 1             | 0           | 0.467834                | -0.000243 | 0.564898  |
| 30            | 1             | 0           | 1.956606                | -0.016674 | 5.859882  |
| 31            | 1             | 0           | -1.874943               | -0.008055 | 1.328169  |
| 32            | 1             | 0           | -2.407874               | -0.021058 | 3.744299  |
| 33            | 1             | 0           | -0.565958               | -0.023825 | 5.415514  |
| 34            | 1             | 0           | 3.196195                | 2.142895  | 6.292632  |
| 35            | 1             | 0           | 4.694791                | 2.084686  | 1.573716  |
| 36            | 1             | 0           | 5.522111                | 3.820504  | 3.104520  |
| 37            | 1             | 0           | 4.750275                | 3.893957  | 5.454853  |
| 38            | 1             | 0           | 3.210724                | -2.169183 | 6.284305  |
| 39            | 1             | 0           | 4.711838                | -2.082135 | 1.566252  |
| 40            | 1             | 0           | 5.549883                | -3.816590 | 3.089748  |
| 41            | 1             | 0           | 4.777716                | -3.905693 | 5.439876  |
| 42            | 1             | 0           | 2.818541                | 2.137810  | 0.545219  |
| 43            | 1             | 0           | 2.853035                | -2.147252 | 0.543731  |
| 44            | 1             | 0           | 2.921820                | -0.003125 | -3.160132 |
| 45            | 1             | 0           | 3.135456                | 2.397196  | -3.016158 |
| 46            | 1             | 0           | 3.126409                | 3.221089  | -1.559707 |
| 47            | 1             | 0           | 2.547069                | -2.395459 | -2.996955 |
| 48            | 1             | 0           | 2.623840                | -3.218906 | -1.543573 |

**Table S4.** Optimized Structural Coordinate and its Total Energy for phenyltriptycene at  $\omega$ 97XD/6-311++G(d,p) level  
total energy: HF= -1001.5076009 hartree (NImag = 0)

| Center Number | Atomic Number | Atomic Type | Coordinates (Angstroms) |           |           |
|---------------|---------------|-------------|-------------------------|-----------|-----------|
|               |               |             | X                       | Y         | Z         |
| 1             | 6             | 0           | -1.188894               | 2.314910  | -0.000008 |
| 2             | 6             | 0           | -0.163736               | 1.380276  | -0.000007 |
| 3             | 6             | 0           | -0.332856               | -0.159666 | 0.000002  |
| 4             | 6             | 0           | 1.159888                | 1.817639  | -0.000013 |
| 5             | 6             | 0           | 2.151078                | 0.682496  | -0.000008 |
| 6             | 6             | 0           | -0.882819               | 3.675316  | -0.000017 |
| 7             | 6             | 0           | 0.437530                | 4.102268  | -0.000024 |
| 8             | 6             | 0           | 1.469034                | 3.166302  | -0.000022 |
| 9             | 6             | 0           | 0.506910                | -0.684726 | -1.193016 |
| 10            | 6             | 0           | 1.817873                | -0.189229 | -1.199327 |
| 11            | 6             | 0           | 2.723077                | -0.576682 | -2.169464 |
| 12            | 6             | 0           | 0.152589                | -1.651740 | -2.121641 |
| 13            | 6             | 0           | 1.066441                | -2.049003 | -3.098700 |
| 14            | 6             | 0           | 2.338512                | -1.500344 | -3.139810 |

|    |   |   |           |           |           |
|----|---|---|-----------|-----------|-----------|
| 15 | 6 | 0 | 0.506915  | -0.684711 | 1.193024  |
| 16 | 6 | 0 | 1.817877  | -0.189213 | 1.199324  |
| 17 | 6 | 0 | 2.723086  | -0.576653 | 2.169462  |
| 18 | 6 | 0 | 0.152598  | -1.651712 | 2.121664  |
| 19 | 6 | 0 | 1.066454  | -2.048962 | 3.098724  |
| 20 | 6 | 0 | 2.338525  | -1.500303 | 3.139822  |
| 21 | 6 | 0 | -1.821233 | -0.475216 | 0.000005  |
| 22 | 6 | 0 | -2.546331 | -0.507950 | -1.193995 |
| 23 | 6 | 0 | -2.546331 | -0.507946 | 1.194006  |
| 24 | 6 | 0 | -3.927918 | -0.656235 | -1.196669 |
| 25 | 6 | 0 | -3.927917 | -0.656231 | 1.196681  |
| 26 | 6 | 0 | -4.625904 | -0.750206 | 0.000007  |
| 27 | 1 | 0 | -4.459688 | -0.682126 | -2.141357 |
| 28 | 1 | 0 | -4.459687 | -0.682120 | 2.141370  |
| 29 | 1 | 0 | -2.225095 | 1.999680  | -0.000003 |
| 30 | 1 | 0 | 3.188309  | 1.019001  | -0.000012 |
| 31 | 1 | 0 | -1.687256 | 4.402243  | -0.000018 |
| 32 | 1 | 0 | 0.667136  | 5.161914  | -0.000031 |
| 33 | 1 | 0 | 2.505719  | 3.487187  | -0.000027 |
| 34 | 1 | 0 | 3.733136  | -0.180095 | -2.157736 |
| 35 | 1 | 0 | -0.820488 | -2.123496 | -2.089006 |
| 36 | 1 | 0 | 0.775451  | -2.799807 | -3.824774 |
| 37 | 1 | 0 | 3.042150  | -1.809413 | -3.904453 |
| 38 | 1 | 0 | 3.733144  | -0.180066 | 2.157724  |
| 39 | 1 | 0 | -0.820479 | -2.123469 | 2.089039  |
| 40 | 1 | 0 | 0.775467  | -2.799757 | 3.824809  |
| 41 | 1 | 0 | 3.042166  | -1.809361 | 3.904466  |
| 42 | 1 | 0 | -2.036547 | -0.373451 | -2.138763 |
| 43 | 1 | 0 | -2.036546 | -0.373443 | 2.138774  |
| 44 | 1 | 0 | -5.703576 | -0.868305 | 0.000007  |

**Table S5.** Optimized Structural Coordinate and its Total Energy for *m*-dinitrobenzene at  $\omega$ 97XD/6-311++G(d,p) level  
total energy: HF= -641.2076232 hartree (NImag = 0)

| Center Number | Atomic Number | Atomic Type | Coordinates (Angstroms) |           |           |
|---------------|---------------|-------------|-------------------------|-----------|-----------|
|               |               |             | X                       | Y         | Z         |
| 1             | 6             | 0           | -0.102708               | -1.807584 | -0.345875 |
| 2             | 6             | 0           | 1.118534                | -1.154155 | -0.442703 |
| 3             | 6             | 0           | 1.170529                | 0.205998  | -0.177703 |
| 4             | 6             | 0           | 0.053373                | 0.939342  | 0.179738  |
| 5             | 6             | 0           | -1.144465               | 0.252736  | 0.265477  |
| 6             | 6             | 0           | -1.246981               | -1.106399 | 0.010153  |
| 7             | 7             | 0           | -2.361864               | 1.002812  | 0.645083  |
| 8             | 8             | 0           | -3.400196               | 0.378523  | 0.713567  |
| 9             | 8             | 0           | -2.241526               | 2.189419  | 0.862181  |
| 10            | 7             | 0           | 2.470279                | 0.905255  | -0.279978 |
| 11            | 8             | 0           | 2.484904                | 2.093989  | -0.042628 |
| 12            | 8             | 0           | 3.435383                | 0.240530  | -0.595044 |
| 13            | 1             | 0           | -0.163031               | -2.869228 | -0.549019 |
| 14            | 1             | 0           | 2.024044                | -1.678042 | -0.718180 |
| 15            | 1             | 0           | 0.113603                | 1.999368  | 0.382565  |
| 16            | 1             | 0           | -2.209882               | -1.592562 | 0.092366  |

**Table S6.** Optimized Structural Coordinate and its Total Energy for *m*-diaminobenzene at  $\omega$ 97XD/6-311++G(d,p) level  
total energy: HF= -342.9409943 hartree (NImag = 0)

| Center Number | Atomic Number | Atomic Type | Coordinates (Angstroms) |           |           |
|---------------|---------------|-------------|-------------------------|-----------|-----------|
|               |               |             | X                       | Y         | Z         |
| 1             | 6             | 0           | -0.642623               | -0.005376 | 2.410542  |
| 2             | 6             | 0           | 0.320989                | -0.005932 | 1.412357  |
| 3             | 6             | 0           | 0.051930                | 0.000869  | -0.113374 |
| 4             | 6             | 0           | 1.669512                | -0.010212 | 1.764011  |
| 5             | 6             | 0           | 2.585715                | -0.005462 | 0.567677  |
| 6             | 6             | 0           | -0.249956               | -0.010982 | 3.748215  |
| 7             | 6             | 0           | 1.095308                | -0.017015 | 4.090244  |
| 8             | 6             | 0           | 2.064729                | -0.016233 | 3.090416  |
| 9             | 6             | 0           | 0.858142                | 1.195350  | -0.685679 |
| 10            | 6             | 0           | 2.198391                | 1.198229  | -0.275423 |
| 11            | 6             | 0           | 3.078444                | 2.168694  | -0.716552 |

|    |   |   |           |           |           |
|----|---|---|-----------|-----------|-----------|
| 12 | 6 | 0 | 0.444507  | 2.127756  | -1.625250 |
| 13 | 6 | 0 | 1.332735  | 3.104628  | -2.077241 |
| 14 | 6 | 0 | 2.637430  | 3.142607  | -1.610778 |
| 15 | 6 | 0 | 0.855971  | -1.189261 | -0.698312 |
| 16 | 6 | 0 | 2.195993  | -1.199491 | -0.287687 |
| 17 | 6 | 0 | 3.074314  | -2.166968 | -0.738797 |
| 18 | 6 | 0 | 0.440669  | -2.110344 | -1.648560 |
| 19 | 6 | 0 | 1.327154  | -3.084300 | -2.110236 |
| 20 | 6 | 0 | 2.631504  | -3.130327 | -1.643477 |
| 21 | 6 | 0 | -1.455967 | 0.002499  | -0.325246 |
| 22 | 6 | 0 | -2.164607 | 1.201495  | -0.298228 |
| 23 | 6 | 0 | -2.163654 | -1.197605 | -0.315036 |
| 24 | 6 | 0 | -3.561875 | 1.207105  | -0.331306 |
| 25 | 6 | 0 | -3.560211 | -1.204746 | -0.348187 |
| 26 | 6 | 0 | -4.257322 | 0.001094  | -0.375939 |
| 27 | 7 | 0 | -4.253812 | 2.414751  | -0.253403 |
| 28 | 7 | 0 | -4.250333 | -2.415411 | -0.397638 |
| 29 | 1 | 0 | -1.696196 | 0.001913  | 2.159906  |
| 30 | 1 | 0 | 3.642560  | -0.007843 | 0.836594  |
| 31 | 1 | 0 | -1.006185 | -0.009139 | 4.525284  |
| 32 | 1 | 0 | 1.392203  | -0.021088 | 5.133118  |
| 33 | 1 | 0 | 3.119923  | -0.019494 | 3.344094  |
| 34 | 1 | 0 | 4.111837  | 2.154104  | -0.385434 |
| 35 | 1 | 0 | -0.558114 | 2.094590  | -2.030235 |
| 36 | 1 | 0 | 0.996218  | 3.832987  | -2.806711 |
| 37 | 1 | 0 | 3.321333  | 3.907048  | -1.961997 |
| 38 | 1 | 0 | 4.107629  | -2.157949 | -0.407190 |
| 39 | 1 | 0 | -0.561504 | -2.072202 | -2.054246 |
| 40 | 1 | 0 | 0.988803  | -3.804061 | -2.847283 |
| 41 | 1 | 0 | 3.313841  | -3.892556 | -2.002506 |
| 42 | 1 | 0 | -1.644538 | 2.143810  | -0.186814 |
| 43 | 1 | 0 | -1.641313 | -2.141190 | -0.228269 |
| 44 | 1 | 0 | -5.343061 | 0.000089  | -0.408804 |
| 45 | 1 | 0 | -5.194548 | 2.400872  | -0.613974 |
| 46 | 1 | 0 | -3.739784 | 3.225912  | -0.558278 |
| 47 | 1 | 0 | -5.189592 | -2.392727 | -0.033028 |
| 48 | 1 | 0 | -3.733827 | -3.214885 | -0.065868 |

**Table S7.** Optimized Structural Coordinate and its Total Energy for benzene at  $\omega$ 97XD/6-311++G(d,p) level  
total energy: HF= -232.2210248 hartree (NImag = 0)

| Center Number | Atomic Number | Atomic Type | Coordinates (Angstroms) |           |           |
|---------------|---------------|-------------|-------------------------|-----------|-----------|
|               |               |             | X                       | Y         | Z         |
| 1             | 6             | 0           | 0.000000                | 1.390839  | -0.000000 |
| 2             | 6             | 0           | 1.204502                | 0.695419  | -0.000000 |
| 3             | 6             | 0           | 1.204502                | -0.695419 | -0.000000 |
| 4             | 6             | 0           | -0.000000               | -1.390839 | -0.000000 |
| 5             | 6             | 0           | -1.204502               | -0.695419 | -0.000000 |
| 6             | 6             | 0           | -1.204502               | 0.695419  | -0.000000 |
| 7             | 1             | 0           | 0.000000                | 2.475249  | -0.000000 |
| 8             | 1             | 0           | 2.143628                | 1.237624  | -0.000000 |
| 9             | 1             | 0           | 2.143628                | -1.237624 | -0.000000 |
| 10            | 1             | 0           | -0.000000               | -2.475249 | -0.000000 |
| 11            | 1             | 0           | -2.143628               | -1.237624 | -0.000000 |
| 12            | 1             | 0           | -2.143628               | 1.237624  | -0.000000 |

**Table S8.** Optimized Structural Coordinate and its Total Energy for **14** (Rotamer A) at  $\omega$ 97XD/6-311++G(d,p) level  
total energy: HF= -2609.3613937 hartree (NImag = 0)

| Center Number | Atomic Number | Atomic Type | Coordinates (Angstroms) |           |          |
|---------------|---------------|-------------|-------------------------|-----------|----------|
|               |               |             | X                       | Y         | Z        |
| 1             | 1             | 0           | -1.856142               | -0.705366 | 2.269290 |
| 2             | 6             | 0           | -0.800417               | -0.706173 | 2.505733 |
| 3             | 6             | 0           | 0.152408                | -0.452114 | 1.527336 |
| 4             | 6             | 0           | -0.127963               | -0.169353 | 0.023066 |
| 5             | 6             | 0           | 1.497474                | -0.474945 | 1.875328 |
| 6             | 6             | 0           | 2.397554                | -0.202282 | 0.705040 |
| 7             | 6             | 0           | -0.392898               | -0.966807 | 3.812321 |
| 8             | 6             | 0           | 0.954129                | -0.976083 | 4.148899 |

|    |    |   |           |           |           |
|----|----|---|-----------|-----------|-----------|
| 9  | 6  | 0 | 1.912173  | -0.728613 | 3.171116  |
| 10 | 1  | 0 | 2.969771  | -0.736081 | 3.411767  |
| 11 | 6  | 0 | 0.634481  | 1.132972  | -0.357227 |
| 12 | 6  | 0 | 1.959625  | 1.130728  | 0.121790  |
| 13 | 6  | 0 | 2.784751  | 2.221081  | -0.069570 |
| 14 | 17 | 0 | 4.417061  | 2.232574  | 0.558647  |
| 15 | 6  | 0 | 0.272031  | 2.161016  | -1.222594 |
| 16 | 6  | 0 | 1.104789  | 3.267625  | -1.399332 |
| 17 | 6  | 0 | 2.343722  | 3.322095  | -0.795586 |
| 18 | 6  | 0 | 0.706354  | -1.198282 | -0.774639 |
| 19 | 6  | 0 | 2.049899  | -1.223153 | -0.367471 |
| 20 | 6  | 0 | 2.939833  | -2.062711 | -1.010537 |
| 21 | 6  | 0 | 0.306653  | -1.932455 | -1.878780 |
| 22 | 6  | 0 | 1.222082  | -2.766843 | -2.518994 |
| 23 | 6  | 0 | 2.531311  | -2.855126 | -2.079863 |
| 24 | 1  | 0 | 3.450762  | -0.211918 | 0.967274  |
| 25 | 1  | 0 | -1.141330 | -1.164012 | 4.571495  |
| 26 | 1  | 0 | 1.259510  | -1.178552 | 5.169224  |
| 27 | 17 | 0 | -1.129545 | 2.103689  | -2.269377 |
| 28 | 1  | 0 | 0.777140  | 4.073795  | -2.043064 |
| 29 | 1  | 0 | 2.988439  | 4.180479  | -0.932953 |
| 30 | 1  | 0 | -0.698937 | -1.850023 | -2.266135 |
| 31 | 1  | 0 | 0.906589  | -3.350218 | -3.376147 |
| 32 | 1  | 0 | 3.243601  | -3.506124 | -2.570609 |
| 33 | 17 | 0 | 4.618786  | -2.127255 | -0.515476 |
| 34 | 6  | 0 | -1.642080 | -0.157528 | -0.124329 |
| 35 | 6  | 0 | -2.333473 | 0.982008  | 0.276120  |
| 36 | 6  | 0 | -2.353992 | -1.316547 | -0.406223 |
| 37 | 6  | 0 | -3.719494 | 0.985141  | 0.320023  |
| 38 | 6  | 0 | -3.746396 | -1.310021 | -0.361092 |
| 39 | 6  | 0 | -4.448544 | -0.159588 | -0.010331 |
| 40 | 1  | 0 | -5.527533 | -0.155606 | 0.017927  |
| 41 | 1  | 0 | -1.812186 | 1.883857  | 0.570186  |
| 42 | 1  | 0 | -1.866441 | -2.257786 | -0.611908 |
| 43 | 8  | 0 | -4.293287 | 2.153384  | 0.702877  |
| 44 | 8  | 0 | -4.343318 | -2.490225 | -0.666334 |
| 45 | 6  | 0 | -5.698703 | 2.220328  | 0.788640  |
| 46 | 6  | 0 | -5.749842 | -2.568903 | -0.610519 |
| 47 | 1  | 0 | -5.931618 | 3.231693  | 1.117388  |
| 48 | 1  | 0 | -6.169555 | 2.042747  | -0.185095 |
| 49 | 1  | 0 | -6.091644 | 1.505129  | 1.520596  |
| 50 | 1  | 0 | -6.004457 | -3.593783 | -0.875016 |
| 51 | 1  | 0 | -6.124118 | -2.353595 | 0.396999  |
| 52 | 1  | 0 | -6.218943 | -1.885827 | -1.327996 |

**Table S9.** Optimized Structural Coordinate and its Total Energy for **14** (Rotamer B) at  $\omega$ 97XD/6-311++G(d,p) level  
total energy: HF= -2609.3578748 hartree (NImag = 0)

| Center Number | Atomic Number | Atomic Type | Coordinates (Angstroms) |           |           |
|---------------|---------------|-------------|-------------------------|-----------|-----------|
|               |               |             | X                       | Y         | Z         |
| 1             | 17            | 0           | -2.015576               | 2.267837  | -1.204302 |
| 2             | 6             | 0           | -0.279938               | 2.157105  | -0.981862 |
| 3             | 6             | 0           | 0.421007                | 1.111486  | -0.369526 |
| 4             | 6             | 0           | -0.080226               | -0.230253 | 0.276154  |
| 5             | 6             | 0           | 1.819920                | 1.251477  | -0.298113 |
| 6             | 6             | 0           | 2.515663                | 0.105012  | 0.379847  |
| 7             | 6             | 0           | 0.396069                | 3.267980  | -1.492568 |
| 8             | 6             | 0           | 1.766424                | 3.379540  | -1.412521 |
| 9             | 6             | 0           | 2.477620                | 2.356434  | -0.806192 |
| 10            | 17            | 0           | 4.217686                | 2.500642  | -0.698574 |
| 11            | 6             | 0           | 0.737902                | -1.376079 | -0.393036 |
| 12            | 6             | 0           | 2.119499                | -1.148051 | -0.369579 |
| 13            | 6             | 0           | 2.986894                | -2.090940 | -0.889814 |
| 14            | 17            | 0           | 4.715753                | -1.810366 | -0.879326 |
| 15            | 6             | 0           | 0.263579                | -2.602567 | -0.834510 |
| 16            | 6             | 0           | 1.151384                | -3.547844 | -1.344707 |
| 17            | 6             | 0           | 2.510416                | -3.293342 | -1.400493 |
| 18            | 6             | 0           | 0.510873                | -0.276116 | 1.716668  |
| 19            | 6             | 0           | 1.889285                | -0.047938 | 1.748751  |
| 20            | 6             | 0           | 2.606429                | -0.089471 | 2.929856  |
| 21            | 6             | 0           | -0.120760               | -0.665165 | 2.890479  |
| 22            | 6             | 0           | 0.598091                | -0.716046 | 4.084869  |

|    |   |   |           |           |           |
|----|---|---|-----------|-----------|-----------|
| 23 | 6 | 0 | 1.948722  | -0.405769 | 4.115565  |
| 24 | 1 | 0 | 3.590902  | 0.241462  | 0.428688  |
| 25 | 1 | 0 | -0.182054 | 4.054581  | -1.959461 |
| 26 | 1 | 0 | 2.277256  | 4.245905  | -1.812130 |
| 27 | 1 | 0 | -0.785853 | -2.849347 | -0.773248 |
| 28 | 1 | 0 | 0.771526  | -4.498930 | -1.699321 |
| 29 | 1 | 0 | 3.202235  | -4.022086 | -1.803320 |
| 30 | 1 | 0 | -1.161838 | -0.953312 | 2.896628  |
| 31 | 1 | 0 | 0.088441  | -1.010681 | 4.995260  |
| 32 | 1 | 0 | 2.497784  | -0.442570 | 5.049477  |
| 33 | 1 | 0 | 3.675347  | 0.094849  | 2.920171  |
| 34 | 6 | 0 | -1.594908 | -0.371162 | 0.177135  |
| 35 | 6 | 0 | -2.178404 | -0.899116 | -0.970897 |
| 36 | 6 | 0 | -2.419489 | 0.170036  | 1.158250  |
| 37 | 6 | 0 | -3.560181 | -0.936971 | -1.107060 |
| 38 | 6 | 0 | -3.801376 | 0.130826  | 1.018880  |
| 39 | 6 | 0 | -4.393600 | -0.437704 | -0.107403 |
| 40 | 1 | 0 | -5.467443 | -0.471903 | -0.211933 |
| 41 | 1 | 0 | -1.587840 | -1.222865 | -1.815271 |
| 42 | 1 | 0 | -2.021951 | 0.700998  | 2.010198  |
| 43 | 8 | 0 | -4.017959 | -1.472174 | -2.267319 |
| 44 | 8 | 0 | -4.506058 | 0.689328  | 2.035406  |
| 45 | 6 | 0 | -5.407934 | -1.484431 | -2.502631 |
| 46 | 6 | 0 | -5.911249 | 0.740373  | 1.934006  |
| 47 | 1 | 0 | -5.542198 | -1.928191 | -3.487637 |
| 48 | 1 | 0 | -5.936327 | -2.093719 | -1.760175 |
| 49 | 1 | 0 | -5.822894 | -0.470005 | -2.505252 |
| 50 | 1 | 0 | -6.259573 | 1.243612  | 2.834340  |
| 51 | 1 | 0 | -6.229083 | 1.313360  | 1.055377  |
| 52 | 1 | 0 | -6.348255 | -0.264131 | 1.893038  |

**Table S10.** Optimized Structural Coordinate and its Total Energy for **14** (Rotamer C) at  $\omega$ 97XD/6-311++G(d,p) level  
total energy: HF= -2609.3614815 hartree (NImag = 0)

| Center Number | Atomic Number | Atomic Type | Coordinates (Angstroms) |           |           |
|---------------|---------------|-------------|-------------------------|-----------|-----------|
|               |               |             | X                       | Y         | Z         |
| 1             | 1             | 0           | -1.489576               | -1.934551 | -1.362944 |
| 2             | 6             | 0           | -0.413083               | -2.034902 | -1.368602 |
| 3             | 6             | 0           | 0.387461                | -1.192072 | -0.610211 |
| 4             | 6             | 0           | -0.119109               | -0.058502 | 0.330903  |
| 5             | 6             | 0           | 1.770215                | -1.355355 | -0.629830 |
| 6             | 6             | 0           | 2.476733                | -0.380551 | 0.265710  |
| 7             | 6             | 0           | 0.177099                | -3.026122 | -2.148029 |
| 8             | 6             | 0           | 1.553465                | -3.186243 | -2.179225 |
| 9             | 6             | 0           | 2.345454                | -2.341895 | -1.411548 |
| 10            | 17            | 0           | 4.083839                | -2.549085 | -1.440166 |
| 11            | 6             | 0           | 0.497598                | -0.343949 | 1.719302  |
| 12            | 6             | 0           | 1.882244                | -0.546812 | 1.655868  |
| 13            | 6             | 0           | 2.624467                | -0.772648 | 2.799313  |
| 14            | 1             | 0           | 3.695516                | -0.929522 | 2.728433  |
| 15            | 6             | 0           | -0.117163               | -0.270254 | 2.959589  |
| 16            | 6             | 0           | 0.631314                | -0.493929 | 4.115975  |
| 17            | 6             | 0           | 1.988357                | -0.765787 | 4.039654  |
| 18            | 6             | 0           | 0.658461                | 1.236211  | -0.043400 |
| 19            | 6             | 0           | 2.041131                | 1.004075  | -0.184036 |
| 20            | 6             | 0           | 2.896539                | 2.020245  | -0.560932 |
| 21            | 6             | 0           | 0.229302                | 2.560003  | -0.068903 |
| 22            | 6             | 0           | 1.095722                | 3.580273  | -0.466000 |
| 23            | 6             | 0           | 2.418431                | 3.312318  | -0.750321 |
| 24            | 1             | 0           | 3.556271                | -0.495972 | 0.258528  |
| 25            | 1             | 0           | -0.448592               | -3.683681 | -2.740255 |
| 26            | 1             | 0           | 2.014118                | -3.955675 | -2.785861 |
| 27            | 1             | 0           | -1.164777               | -0.017242 | 3.047556  |
| 28            | 1             | 0           | 0.141986                | -0.444480 | 5.082114  |
| 29            | 1             | 0           | 2.560831                | -0.942415 | 4.943057  |
| 30            | 17            | 0           | -1.327032               | 3.090885  | 0.530495  |
| 31            | 1             | 0           | 0.722209                | 4.594799  | -0.519681 |
| 32            | 1             | 0           | 3.089096                | 4.103989  | -1.058269 |
| 33            | 17            | 0           | 4.607380                | 1.722307  | -0.767501 |
| 34            | 6             | 0           | -1.631878               | -0.029732 | 0.171681  |
| 35            | 6             | 0           | -2.460261               | -0.797158 | 0.980293  |
| 36            | 6             | 0           | -2.166090               | 0.585021  | -0.957082 |

|    |   |   |           |           |           |
|----|---|---|-----------|-----------|-----------|
| 37 | 6 | 0 | -3.822497 | -0.885177 | 0.701704  |
| 38 | 6 | 0 | -3.522540 | 0.495738  | -1.231295 |
| 39 | 6 | 0 | -4.374642 | -0.232769 | -0.397919 |
| 40 | 1 | 0 | -5.431429 | -0.297918 | -0.607585 |
| 41 | 1 | 0 | -2.080305 | -1.383785 | 1.803176  |
| 42 | 1 | 0 | -1.541764 | 1.135408  | -1.649120 |
| 43 | 8 | 0 | -4.543059 | -1.649979 | 1.560674  |
| 44 | 8 | 0 | -3.941998 | 1.148933  | -2.343970 |
| 45 | 6 | 0 | -5.923817 | -1.810695 | 1.325578  |
| 46 | 6 | 0 | -5.306463 | 1.084654  | -2.692198 |
| 47 | 1 | 0 | -6.289651 | -2.462644 | 2.116970  |
| 48 | 1 | 0 | -6.453925 | -0.852659 | 1.376001  |
| 49 | 1 | 0 | -6.113386 | -2.282361 | 0.354408  |
| 50 | 1 | 0 | -5.410621 | 1.665953  | -3.606752 |
| 51 | 1 | 0 | -5.624593 | 0.053249  | -2.883811 |
| 52 | 1 | 0 | -5.940841 | 1.524145  | -1.913890 |

**Table S11.** Optimized Structural Coordinate and its Total Energy for **14 14** (TS1: a transition state between Rotamers A and B) at  $\omega$ 97XD/6-311++G(d,p) level  
total energy: HF= -2609.3559637 hartree (NImag = 1)

| Center Number | Atomic Number | Atomic Type | Coordinates (Angstroms) |           |           |
|---------------|---------------|-------------|-------------------------|-----------|-----------|
|               |               |             | X                       | Y         | Z         |
| 1             | 1             | 0           | 0.523656                | 3.027788  | -1.027383 |
| 2             | 6             | 0           | -0.497797               | 2.712085  | -0.915030 |
| 3             | 6             | 0           | -0.834475               | 1.481704  | -0.373209 |
| 4             | 6             | 0           | 0.083139                | 0.335676  | 0.146637  |
| 5             | 6             | 0           | -2.198277               | 1.175633  | -0.192897 |
| 6             | 6             | 0           | -2.469570               | -0.143597 | 0.507137  |
| 7             | 6             | 0           | -1.493373               | 3.604957  | -1.311723 |
| 8             | 6             | 0           | -2.830857               | 3.292685  | -1.168272 |
| 9             | 6             | 0           | -3.170592               | 2.071008  | -0.596454 |
| 10            | 17            | 0           | -4.869563               | 1.698805  | -0.383882 |
| 11            | 6             | 0           | -0.365935               | 0.214409  | 1.635712  |
| 12            | 6             | 0           | -1.717643               | -0.062479 | 1.809451  |
| 13            | 6             | 0           | -2.284855               | -0.164954 | 3.067361  |
| 14            | 1             | 0           | -3.341399               | -0.387955 | 3.169899  |
| 15            | 6             | 0           | 0.416804                | 0.463284  | 2.755358  |
| 16            | 6             | 0           | -0.147622               | 0.373959  | 4.026168  |
| 17            | 6             | 0           | -1.486654               | 0.045338  | 4.187538  |
| 18            | 6             | 0           | -0.452580               | -0.919608 | -0.618955 |
| 19            | 6             | 0           | -1.798916               | -1.200103 | -0.333205 |
| 20            | 6             | 0           | -2.434156               | -2.310954 | -0.855901 |
| 21            | 6             | 0           | 0.171659                | -1.718748 | -1.578408 |
| 22            | 6             | 0           | -0.472426               | -2.844503 | -2.093513 |
| 23            | 6             | 0           | -1.761392               | -3.163137 | -1.719834 |
| 24            | 1             | 0           | -3.529086               | -0.332798 | 0.644199  |
| 25            | 1             | 0           | -1.209624               | 4.560391  | -1.737370 |
| 26            | 1             | 0           | -3.606785               | 3.980818  | -1.478255 |
| 27            | 1             | 0           | 1.461926                | 0.723194  | 2.654569  |
| 28            | 1             | 0           | 0.471505                | 0.564752  | 4.895435  |
| 29            | 1             | 0           | -1.914314               | -0.028541 | 5.180943  |
| 30            | 17            | 0           | 1.720845                | -1.377003 | -2.319174 |
| 31            | 1             | 0           | 0.050561                | -3.460378 | -2.813619 |
| 32            | 1             | 0           | -2.253925               | -4.038885 | -2.122115 |
| 33            | 17            | 0           | -4.101397               | -2.662219 | -0.460333 |
| 34            | 6             | 0           | 1.612199                | 0.389929  | 0.105748  |
| 35            | 6             | 0           | 2.391359                | 1.360538  | -0.502717 |
| 36            | 6             | 0           | 2.254076                | -0.684152 | 0.728095  |
| 37            | 6             | 0           | 3.782344                | 1.260801  | -0.488335 |
| 38            | 6             | 0           | 3.634813                | -0.782987 | 0.738640  |
| 39            | 6             | 0           | 4.425413                | 0.195823  | 0.131946  |
| 40            | 1             | 0           | 5.502283                | 0.123112  | 0.138387  |
| 41            | 1             | 0           | 1.988367                | 2.182742  | -1.063716 |
| 42            | 1             | 0           | 1.687440                | -1.477516 | 1.198885  |
| 43            | 8             | 0           | 4.436074                | 2.265212  | -1.126379 |
| 44            | 8             | 0           | 4.143406                | -1.874496 | 1.363997  |
| 45            | 6             | 0           | 5.843994                | 2.222884  | -1.184467 |
| 46            | 6             | 0           | 5.541378                | -2.055599 | 1.376125  |
| 47            | 1             | 0           | 6.148686                | 3.105580  | -1.744120 |
| 48            | 1             | 0           | 6.288514                | 2.261427  | -0.183239 |
| 49            | 1             | 0           | 6.196796                | 1.326067  | -1.706596 |

|    |   |   |          |           |          |
|----|---|---|----------|-----------|----------|
| 50 | 1 | 0 | 6.048459 | -1.240347 | 1.905258 |
| 51 | 1 | 0 | 5.718609 | -2.989153 | 1.907414 |
| 52 | 1 | 0 | 5.944080 | -2.138264 | 0.360117 |

**Table S12.** Optimized Structural Coordinate and its Total Energy for **14 14** (TS1: a transition state between Rotamers B and C) at  $\omega$ 97XD/6-311++G(d,p) level  
total energy: HF= -2609.3564133 hartree (NImag = 1)

| Center Number | Atomic Number | Atomic Type | Coordinates (Angstroms) |           |           |
|---------------|---------------|-------------|-------------------------|-----------|-----------|
|               |               |             | X                       | Y         | Z         |
| 1             | 1             | 0           | -0.995444               | -1.585295 | 2.903130  |
| 2             | 6             | 0           | 0.057600                | -1.387629 | 2.804256  |
| 3             | 6             | 0           | 0.596804                | -0.799987 | 1.668670  |
| 4             | 6             | 0           | -0.091350               | -0.299787 | 0.364770  |
| 5             | 6             | 0           | 1.993432                | -0.657667 | 1.604874  |
| 6             | 6             | 0           | 2.523402                | -0.114284 | 0.290630  |
| 7             | 6             | 0           | 0.883997                | -1.775314 | 3.860868  |
| 8             | 6             | 0           | 2.254155                | -1.594277 | 3.796180  |
| 9             | 6             | 0           | 2.813917                | -1.038185 | 2.648788  |
| 10            | 1             | 0           | 3.887850                | -0.912243 | 2.562092  |
| 11            | 6             | 0           | 0.448742                | 1.160864  | 0.210328  |
| 12            | 6             | 0           | 1.846601                | 1.216234  | 0.081334  |
| 13            | 6             | 0           | 2.507898                | 2.410917  | -0.133508 |
| 14            | 17            | 0           | 4.246528                | 2.455473  | -0.318689 |
| 15            | 6             | 0           | -0.231202               | 2.378923  | 0.266889  |
| 16            | 6             | 0           | 0.441742                | 3.579835  | 0.037312  |
| 17            | 6             | 0           | 1.802167                | 3.604309  | -0.188356 |
| 18            | 6             | 0           | 0.605157                | -1.179812 | -0.721133 |
| 19            | 6             | 0           | 1.992139                | -1.047664 | -0.764741 |
| 20            | 6             | 0           | 2.734877                | -1.801016 | -1.656508 |
| 21            | 6             | 0           | -0.017386               | -2.123215 | -1.525575 |
| 22            | 6             | 0           | 0.742584                | -2.884873 | -2.409213 |
| 23            | 6             | 0           | 2.115825                | -2.720485 | -2.494471 |
| 24            | 1             | 0           | 3.606027                | -0.036400 | 0.282799  |
| 25            | 1             | 0           | 0.436174                | -2.227842 | 4.738346  |
| 26            | 1             | 0           | 2.888181                | -1.895883 | 4.621907  |
| 27            | 17            | 0           | -1.910023               | 2.575666  | 0.723454  |
| 28            | 1             | 0           | -0.120269               | 4.504500  | 0.059265  |
| 29            | 1             | 0           | 2.317026                | 4.539406  | -0.366891 |
| 30            | 1             | 0           | -1.087014               | -2.272235 | -1.477452 |
| 31            | 1             | 0           | 0.253467                | -3.616985 | -3.041173 |
| 32            | 1             | 0           | 2.708362                | -3.305872 | -3.186097 |
| 33            | 17            | 0           | 4.476324                | -1.631162 | -1.725720 |
| 34            | 6             | 0           | -1.602727               | -0.350770 | 0.134469  |
| 35            | 6             | 0           | -2.564268               | -0.687116 | 1.073117  |
| 36            | 6             | 0           | -2.022149               | 0.020834  | -1.145642 |
| 37            | 6             | 0           | -3.917736               | -0.656561 | 0.738460  |
| 38            | 6             | 0           | -3.366373               | 0.052782  | -1.475143 |
| 39            | 6             | 0           | -4.340191               | -0.292647 | -0.535170 |
| 40            | 1             | 0           | -5.389327               | -0.269709 | -0.787807 |
| 41            | 1             | 0           | -2.338284               | -0.913269 | 2.098441  |
| 42            | 1             | 0           | -1.308929               | 0.315871  | -1.904939 |
| 43            | 8             | 0           | -4.765534               | -0.995257 | 1.743075  |
| 44            | 8             | 0           | -3.653811               | 0.437250  | -2.744355 |
| 45            | 6             | 0           | -6.152818               | -0.959645 | 1.494988  |
| 46            | 6             | 0           | -5.006076               | 0.532533  | -3.131340 |
| 47            | 1             | 0           | -6.632797               | -1.252562 | 2.427187  |
| 48            | 1             | 0           | -6.485136               | 0.048039  | 1.220175  |
| 49            | 1             | 0           | -6.438009               | -1.666081 | 0.706832  |
| 50            | 1             | 0           | -4.999110               | 0.870781  | -4.166111 |
| 51            | 1             | 0           | -5.510348               | -0.439237 | -3.075486 |
| 52            | 1             | 0           | -5.548328               | 1.261682  | -2.518541 |

**Table S13.** Optimized Structural Coordinate and its Total Energy for **14 14** (TS1: a transition state between Rotamers C and A) at  $\omega$ 97XD/6-311++G(d,p) level  
total energy: HF= -2609.3427653 hartree (NImag = 1)

| Center Number | Atomic Number | Atomic Type | Coordinates (Angstroms) |   |   |
|---------------|---------------|-------------|-------------------------|---|---|
|               |               |             | X                       | Y | Z |

|    |    |   |           |           |           |
|----|----|---|-----------|-----------|-----------|
| 1  | 17 | 0 | -0.680524 | 3.666660  | -0.670712 |
| 2  | 6  | 0 | 0.781095  | 2.750760  | -0.363302 |
| 3  | 6  | 0 | 0.876312  | 1.388762  | -0.074450 |
| 4  | 6  | 0 | -0.156241 | 0.185621  | 0.095194  |
| 5  | 6  | 0 | 2.203886  | 0.904589  | 0.128764  |
| 6  | 6  | 0 | 2.333680  | -0.576769 | 0.447601  |
| 7  | 6  | 0 | 1.913293  | 3.571532  | -0.441083 |
| 8  | 6  | 0 | 3.176698  | 3.077953  | -0.238087 |
| 9  | 6  | 0 | 3.309721  | 1.727139  | 0.048769  |
| 10 | 17 | 0 | 4.927230  | 1.108749  | 0.307516  |
| 11 | 6  | 0 | 0.383652  | -0.832477 | -0.949208 |
| 12 | 6  | 0 | 1.682794  | -1.271563 | -0.716647 |
| 13 | 6  | 0 | 2.271863  | -2.177642 | -1.582579 |
| 14 | 17 | 0 | 3.898940  | -2.754743 | -1.289776 |
| 15 | 6  | 0 | -0.296291 | -1.251557 | -2.083661 |
| 16 | 6  | 0 | 0.312560  | -2.149163 | -2.954789 |
| 17 | 6  | 0 | 1.588826  | -2.631213 | -2.703819 |
| 18 | 6  | 0 | 0.191362  | -0.325610 | 1.520958  |
| 19 | 6  | 0 | 1.494196  | -0.777386 | 1.679910  |
| 20 | 6  | 0 | 1.953480  | -1.251474 | 2.897208  |
| 21 | 6  | 0 | -0.655504 | -0.294339 | 2.620867  |
| 22 | 6  | 0 | -0.199652 | -0.758440 | 3.851778  |
| 23 | 6  | 0 | 1.092342  | -1.250864 | 3.989738  |
| 24 | 1  | 0 | 3.365886  | -0.876146 | 0.592048  |
| 25 | 1  | 0 | 1.773904  | 4.620155  | -0.667704 |
| 26 | 1  | 0 | 4.045093  | 3.720394  | -0.299795 |
| 27 | 1  | 0 | -1.296799 | -0.895100 | -2.290372 |
| 28 | 1  | 0 | -0.217523 | -2.481792 | -3.839614 |
| 29 | 1  | 0 | 2.060820  | -3.338708 | -3.373760 |
| 30 | 1  | 0 | -1.667912 | 0.077889  | 2.526881  |
| 31 | 1  | 0 | -0.864063 | -0.735753 | 4.708122  |
| 32 | 1  | 0 | 1.434929  | -1.618047 | 4.950489  |
| 33 | 1  | 0 | 2.975877  | -1.600596 | 2.994257  |
| 34 | 6  | 0 | -1.699746 | 0.148656  | -0.017865 |
| 35 | 6  | 0 | -2.588877 | 1.166507  | -0.299936 |
| 36 | 6  | 0 | -2.227533 | -1.133440 | 0.208835  |
| 37 | 6  | 0 | -3.964433 | 0.922133  | -0.355116 |
| 38 | 6  | 0 | -3.587444 | -1.374472 | 0.152955  |
| 39 | 6  | 0 | -4.487914 | -0.342976 | -0.131928 |
| 40 | 1  | 0 | -5.550774 | -0.525822 | -0.175912 |
| 41 | 1  | 0 | -2.275287 | 2.171914  | -0.485546 |
| 42 | 1  | 0 | -1.584716 | -1.973610 | 0.435938  |
| 43 | 8  | 0 | -4.723236 | 2.011294  | -0.640958 |
| 44 | 8  | 0 | -3.969309 | -2.656481 | 0.390155  |
| 45 | 6  | 0 | -6.121822 | 1.855332  | -0.714199 |
| 46 | 6  | 0 | -5.342834 | -2.969812 | 0.351733  |
| 47 | 1  | 0 | -6.522834 | 2.839552  | -0.950268 |
| 48 | 1  | 0 | -6.406598 | 1.151907  | -1.505398 |
| 49 | 1  | 0 | -6.538697 | 1.517119  | 0.241665  |
| 50 | 1  | 0 | -5.413962 | -4.034465 | 0.568039  |
| 51 | 1  | 0 | -5.904774 | -2.411803 | 1.109728  |
| 52 | 1  | 0 | -5.773001 | -2.775646 | -0.637724 |

**Table S14.** Optimized Structural Coordinate and its Total Energy for **12** at PCM- $\omega$ 97XD/6-311++G(d,p) level  
total energy: HF= -1410.5070987 hartree (NImag = 0)

| Center Number | Atomic Number | Atomic Type | Coordinates (Angstroms) |           |           |
|---------------|---------------|-------------|-------------------------|-----------|-----------|
|               |               |             | X                       | Y         | Z         |
| 1             | 6             | 0           | 0.081538                | -0.000003 | 2.482022  |
| 2             | 6             | 0           | 0.987676                | -0.000002 | 1.431093  |
| 3             | 6             | 0           | 0.645355                | 0.000000  | -0.080037 |
| 4             | 6             | 0           | 2.355278                | -0.000002 | 1.704448  |
| 5             | 6             | 0           | 3.204928                | -0.000001 | 0.459089  |
| 6             | 6             | 0           | 0.548972                | -0.000005 | 3.796539  |
| 7             | 6             | 0           | 1.911496                | -0.000006 | 4.060203  |
| 8             | 6             | 0           | 2.823703                | -0.000004 | 3.006545  |
| 9             | 6             | 0           | 1.408498                | 1.197025  | -0.700769 |
| 10            | 6             | 0           | 2.769328                | 1.200529  | -0.365301 |
| 11            | 6             | 0           | 3.620550                | 2.174007  | -0.854666 |
| 12            | 6             | 0           | 0.936614                | 2.130778  | -1.611234 |
| 13            | 6             | 0           | 1.795418                | 3.111887  | -2.110120 |
| 14            | 6             | 0           | 3.125127                | 3.149284  | -1.719676 |



|    |   |   |           |           |           |
|----|---|---|-----------|-----------|-----------|
| 15 | 6 | 0 | 1.408497  | -1.197023 | -0.700772 |
| 16 | 6 | 0 | 2.769328  | -1.200528 | -0.365305 |
| 17 | 6 | 0 | 3.620549  | -2.174006 | -0.854672 |
| 18 | 6 | 0 | 0.936613  | -2.130773 | -1.611240 |
| 19 | 6 | 0 | 1.795416  | -3.111881 | -2.110128 |
| 20 | 6 | 0 | 3.125126  | -3.149280 | -1.719685 |
| 21 | 6 | 0 | -0.865709 | 0.000000  | -0.219377 |
| 22 | 6 | 0 | -1.586481 | 1.192750  | -0.173518 |
| 23 | 6 | 0 | -1.586481 | -1.192749 | -0.173520 |
| 24 | 6 | 0 | -2.971485 | 1.170135  | -0.181742 |
| 25 | 6 | 0 | -2.971485 | -1.170134 | -0.181744 |
| 26 | 6 | 0 | -3.705133 | 0.000000  | -0.201422 |
| 27 | 7 | 0 | -3.697863 | 2.454205  | -0.150631 |
| 28 | 7 | 0 | -3.697863 | -2.454204 | -0.150632 |
| 29 | 1 | 0 | -0.987081 | -0.000003 | 2.305486  |
| 30 | 1 | 0 | 4.273700  | -0.000001 | 0.670328  |
| 31 | 1 | 0 | -0.162245 | -0.000006 | 4.614537  |
| 32 | 1 | 0 | 2.267209  | -0.000007 | 5.084213  |
| 33 | 1 | 0 | 3.891080  | -0.000005 | 3.200190  |
| 34 | 1 | 0 | 4.670803  | 2.162012  | -0.583100 |
| 35 | 1 | 0 | -0.084802 | 2.107063  | -1.968427 |
| 36 | 1 | 0 | 1.414032  | 3.843177  | -2.813411 |
| 37 | 1 | 0 | 3.785667  | 3.916601  | -2.106819 |
| 38 | 1 | 0 | 4.670802  | -2.162012 | -0.583106 |
| 39 | 1 | 0 | -0.084803 | -2.107058 | -1.968432 |
| 40 | 1 | 0 | 1.414031  | -3.843170 | -2.813421 |
| 41 | 1 | 0 | 3.785665  | -3.916596 | -2.106829 |
| 42 | 1 | 0 | -1.087557 | 2.147242  | -0.093253 |
| 43 | 1 | 0 | -1.087556 | -2.147241 | -0.093255 |
| 44 | 1 | 0 | -4.785069 | 0.000000  | -0.210918 |
| 45 | 8 | 0 | -4.911438 | 2.414258  | -0.137497 |
| 46 | 8 | 0 | -3.040014 | 3.475050  | -0.140940 |
| 47 | 8 | 0 | -4.911437 | -2.414257 | -0.137498 |
| 48 | 8 | 0 | -3.040013 | -3.475050 | -0.140942 |

**Table S15.** Optimized Structural Coordinate and its Total Energy for **13** at PCM- $\omega$ 97XD/6-311++G(d,p) level  
total energy: HF= -1112.240208 hartree (NImag = 0)

| Center Number | Atomic Number | Atomic Type | Coordinates (Angstroms) |           |           |
|---------------|---------------|-------------|-------------------------|-----------|-----------|
|               |               |             | X                       | Y         | Z         |
| 1             | 6             | 0           | 0.249782                | -0.010162 | 1.626767  |
| 2             | 6             | 0           | 1.278519                | -0.011527 | 2.558620  |
| 3             | 6             | 0           | 2.795058                | -0.006307 | 2.240774  |
| 4             | 6             | 0           | 0.969163                | -0.015911 | 3.918137  |
| 5             | 6             | 0           | 2.192958                | -0.013540 | 4.797742  |
| 6             | 6             | 0           | -1.075747               | -0.014337 | 2.061016  |
| 7             | 6             | 0           | -1.375243               | -0.019746 | 3.417288  |
| 8             | 6             | 0           | -0.344899               | -0.020296 | 4.355361  |
| 9             | 6             | 0           | 3.393394                | 1.187288  | 3.030777  |
| 10            | 6             | 0           | 3.025517                | 1.188729  | 4.383892  |
| 11            | 6             | 0           | 3.495235                | 2.157328  | 5.252328  |
| 12            | 6             | 0           | 4.319031                | 2.121466  | 2.588533  |
| 13            | 6             | 0           | 4.800233                | 3.096588  | 3.464308  |
| 14            | 6             | 0           | 4.376392                | 3.131670  | 4.784389  |
| 15            | 6             | 0           | 3.402493                | -1.198297 | 3.026502  |
| 16            | 6             | 0           | 3.034231                | -1.208034 | 4.379423  |
| 17            | 6             | 0           | 3.510920                | -2.176560 | 5.244189  |
| 18            | 6             | 0           | 4.335877                | -2.123285 | 2.580885  |
| 19            | 6             | 0           | 4.823930                | -3.098339 | 3.452948  |
| 20            | 6             | 0           | 4.399553                | -3.142315 | 4.772608  |
| 21            | 6             | 0           | 2.959687                | -0.003819 | 0.726116  |
| 22            | 6             | 0           | 2.913486                | 1.196523  | 0.019836  |
| 23            | 6             | 0           | 2.925096                | -1.203859 | 0.018095  |
| 24            | 6             | 0           | 2.901995                | 1.203935  | -1.378987 |
| 25            | 6             | 0           | 2.914558                | -1.209913 | -1.380143 |
| 26            | 6             | 0           | 2.922071                | -0.002439 | -2.076805 |
| 27            | 7             | 0           | 2.802122                | 2.412534  | -2.066918 |
| 28            | 7             | 0           | 2.944647                | -2.419850 | -2.072735 |
| 29            | 1             | 0           | 0.466680                | -0.004293 | 0.565652  |
| 30            | 1             | 0           | 1.957297                | -0.016310 | 5.861813  |
| 31            | 1             | 0           | -1.876182               | -0.012399 | 1.329502  |
| 32            | 1             | 0           | -2.408227               | -0.022730 | 3.746998  |

|    |   |   |           |           |           |
|----|---|---|-----------|-----------|-----------|
| 33 | 1 | 0 | -0.564964 | -0.023508 | 5.417939  |
| 34 | 1 | 0 | 3.196888  | 2.140538  | 6.295513  |
| 35 | 1 | 0 | 4.689781  | 2.095044  | 1.572679  |
| 36 | 1 | 0 | 5.517326  | 3.826296  | 3.104960  |
| 37 | 1 | 0 | 4.749850  | 3.894544  | 5.458242  |
| 38 | 1 | 0 | 3.212049  | -2.166232 | 6.287320  |
| 39 | 1 | 0 | 4.707309  | -2.090591 | 1.565458  |
| 40 | 1 | 0 | 5.546589  | -3.821002 | 3.090599  |
| 41 | 1 | 0 | 4.778404  | -3.905211 | 5.443432  |
| 42 | 1 | 0 | 2.826078  | 2.140297  | 0.541537  |
| 43 | 1 | 0 | 2.854808  | -2.149368 | 0.539198  |
| 44 | 1 | 0 | 2.919082  | -0.002438 | -3.162825 |
| 45 | 1 | 0 | 3.135621  | 2.394477  | -3.018723 |
| 46 | 1 | 0 | 3.145009  | 3.218398  | -1.566593 |
| 47 | 1 | 0 | 2.551551  | -2.391854 | -3.001424 |
| 48 | 1 | 0 | 2.610052  | -3.215990 | -1.551027 |

**Table S16.** Optimized Structural Coordinate and its Total Energy for phenyltriptycene at PCM- $\omega$ 97XD/6-311++G(d,p) level  
total energy: HF= -1001.5137319 hartree (NImag = 0)

| Center Number | Atomic Number | Atomic Type | Coordinates (Angstroms) |           |           |
|---------------|---------------|-------------|-------------------------|-----------|-----------|
|               |               |             | X                       | Y         | Z         |
| 1             | 6             | 0           | -1.186280               | 2.316420  | -0.000009 |
| 2             | 6             | 0           | -0.162003               | 1.379945  | -0.000006 |
| 3             | 6             | 0           | -0.334032               | -0.159891 | 0.000001  |
| 4             | 6             | 0           | 1.162789                | 1.815774  | -0.000009 |
| 5             | 6             | 0           | 2.153738                | 0.680082  | -0.000004 |
| 6             | 6             | 0           | -0.878689               | 3.677210  | -0.000015 |
| 7             | 6             | 0           | 0.443139                | 4.102452  | -0.000018 |
| 8             | 6             | 0           | 1.474145                | 3.164786  | -0.000015 |
| 9             | 6             | 0           | 0.506025                | -0.685375 | -1.193392 |
| 10            | 6             | 0           | 1.818194                | -0.191509 | -1.198881 |
| 11            | 6             | 0           | 2.724486                | -0.579481 | -2.168865 |
| 12            | 6             | 0           | 0.150135                | -1.650384 | -2.124372 |
| 13            | 6             | 0           | 1.064608                | -2.048539 | -3.101447 |
| 14            | 6             | 0           | 2.338695                | -1.502349 | -3.140581 |
| 15            | 6             | 0           | 0.506026                | -0.685365 | 1.193398  |
| 16            | 6             | 0           | 1.818195                | -0.191498 | 1.198881  |
| 17            | 6             | 0           | 2.724489                | -0.579461 | 2.168868  |
| 18            | 6             | 0           | 0.150138                | -1.650366 | 2.124387  |
| 19            | 6             | 0           | 1.064613                | -2.048511 | 3.101465  |
| 20            | 6             | 0           | 2.338699                | -1.502321 | 3.140592  |
| 21            | 6             | 0           | -1.823362               | -0.473907 | 0.000003  |
| 22            | 6             | 0           | -2.548656               | -0.506500 | -1.194290 |
| 23            | 6             | 0           | -2.548657               | -0.506486 | 1.194296  |
| 24            | 6             | 0           | -3.930892               | -0.653446 | -1.197206 |
| 25            | 6             | 0           | -3.930893               | -0.653432 | 1.197214  |
| 26            | 6             | 0           | -4.629295               | -0.746373 | 0.000004  |
| 27            | 1             | 0           | -4.462141               | -0.679721 | -2.142106 |
| 28            | 1             | 0           | -4.462142               | -0.679696 | 2.142114  |
| 29            | 1             | 0           | -2.223073               | 2.002946  | -0.000007 |
| 30            | 1             | 0           | 3.190831                | 1.014879  | -0.000006 |
| 31            | 1             | 0           | -1.682262               | 4.405163  | -0.000018 |
| 32            | 1             | 0           | 0.674248                | 5.161798  | -0.000023 |
| 33            | 1             | 0           | 2.511147                | 3.484188  | -0.000017 |
| 34            | 1             | 0           | 3.734937                | -0.184271 | -2.155429 |
| 35            | 1             | 0           | -0.824378               | -2.119267 | -2.096489 |
| 36            | 1             | 0           | 0.772070                | -2.797157 | -3.829172 |
| 37            | 1             | 0           | 3.042529                | -1.811978 | -3.904885 |
| 38            | 1             | 0           | 3.734940                | -0.184251 | 2.155427  |
| 39            | 1             | 0           | -0.824375               | -2.119249 | 2.096509  |
| 40            | 1             | 0           | 0.772075                | -2.797124 | 3.829196  |
| 41            | 1             | 0           | 3.042534                | -1.811943 | 3.904897  |
| 42            | 1             | 0           | -2.040989               | -0.374927 | -2.140534 |
| 43            | 1             | 0           | -2.040990               | -0.374902 | 2.140539  |
| 44            | 1             | 0           | -5.707089               | -0.863324 | 0.000005  |

**Table S17.** Optimized Structural Coordinate and its Total Energy for *m*-dinitrobenzene at PCM- $\omega$ 97XD/6-311++G(d,p) level  
total energy: HF= -641.2162249 hartree (NImag = 0)

| Center Number | Atomic Number | Atomic Type | Coordinates (Angstroms) |           |           |
|---------------|---------------|-------------|-------------------------|-----------|-----------|
|               |               |             | X                       | Y         | Z         |
| 1             | 6             | 0           | 0.000000                | -2.229823 | 0.000004  |
| 2             | 6             | 0           | -1.204256               | -1.539320 | 0.000003  |
| 3             | 6             | 0           | -1.178194               | -0.152228 | 0.000000  |
| 4             | 6             | 0           | 0.000000                | 0.572415  | -0.000002 |
| 5             | 6             | 0           | 1.178194                | -0.152228 | -0.000000 |
| 6             | 6             | 0           | 1.204256                | -1.539320 | 0.000002  |
| 7             | 7             | 0           | 2.454755                | 0.587019  | -0.000003 |
| 8             | 8             | 0           | 3.481100                | -0.062500 | -0.000008 |
| 9             | 8             | 0           | 2.405174                | 1.800316  | 0.000008  |
| 10            | 7             | 0           | -2.454755               | 0.587019  | -0.000002 |
| 11            | 8             | 0           | -2.405174               | 1.800316  | 0.000003  |
| 12            | 8             | 0           | -3.481100               | -0.062500 | -0.000006 |
| 13            | 1             | 0           | 0.000000                | -3.311885 | 0.000007  |
| 14            | 1             | 0           | -2.151727               | -2.060568 | 0.000004  |
| 15            | 1             | 0           | 0.000000                | 1.652734  | -0.000003 |
| 16            | 1             | 0           | 2.151727                | -2.060568 | 0.000003  |

**Table S18.** Optimized Structural Coordinate and its Total Energy for *m*-diaminobenzene at PCM- $\omega$ 97XD/6-311++G(d,p) level  
total energy: HF= -342.9489447 hartree (NImag = 0)

| Center Number | Atomic Number | Atomic Type | Coordinates (Angstroms) |           |           |
|---------------|---------------|-------------|-------------------------|-----------|-----------|
|               |               |             | X                       | Y         | Z         |
| 1             | 6             | 0           | -0.000000               | -0.000000 | 1.786954  |
| 2             | 6             | 0           | 0.000647                | -1.211751 | 1.109564  |
| 3             | 6             | 0           | -0.000000               | -1.215264 | -0.290886 |
| 4             | 6             | 0           | 0.000000                | 0.000000  | -0.978971 |
| 5             | 6             | 0           | 0.000000                | 1.215264  | -0.290886 |
| 6             | 6             | 0           | -0.000647               | 1.211751  | 1.109564  |
| 7             | 7             | 0           | -0.057216               | 2.417884  | -0.994996 |
| 8             | 1             | 0           | 0.290804                | 3.220924  | -0.493450 |
| 9             | 1             | 0           | 0.304958                | 2.381883  | -1.935862 |
| 10            | 7             | 0           | 0.057216                | -2.417884 | -0.994996 |
| 11            | 1             | 0           | -0.304958               | -2.381883 | -1.935862 |
| 12            | 1             | 0           | -0.290804               | -3.220924 | -0.493450 |
| 13            | 1             | 0           | -0.000000               | -0.000000 | 2.871981  |
| 14            | 1             | 0           | 0.004946                | -2.149289 | 1.654972  |
| 15            | 1             | 0           | 0.000000                | 0.000000  | -2.065389 |
| 16            | 1             | 0           | -0.004946               | 2.149289  | 1.654972  |

**Table S19.** Optimized Structural Coordinate and its Total Energy for benzene at PCM- $\omega$ 97XD/6-311++G(d,p) level  
total energy: HF= -232.2232422 hartree (NImag = 0)

| Center Number | Atomic Number | Atomic Type | Coordinates (Angstroms) |           |           |
|---------------|---------------|-------------|-------------------------|-----------|-----------|
|               |               |             | X                       | Y         | Z         |
| 1             | 6             | 0           | -0.000000               | 0.000000  | 1.391688  |
| 2             | 6             | 0           | -0.000000               | 1.205270  | 0.695855  |
| 3             | 6             | 0           | 0.000000                | 1.205270  | -0.695855 |
| 4             | 6             | 0           | 0.000000                | 0.000000  | -1.391688 |
| 5             | 6             | 0           | -0.000000               | -1.205270 | -0.695855 |
| 6             | 6             | 0           | -0.000000               | -1.205270 | 0.695855  |
| 7             | 1             | 0           | -0.000000               | 0.000000  | 2.476136  |
| 8             | 1             | 0           | -0.000000               | 2.144424  | 1.238098  |
| 9             | 1             | 0           | 0.000000                | 2.144424  | -1.238098 |
| 10            | 1             | 0           | 0.000000                | 0.000000  | -2.476136 |
| 11            | 1             | 0           | -0.000000               | -2.144424 | -1.238098 |
| 12            | 1             | 0           | -0.000000               | -2.144424 | 1.238098  |

**Table S20.** Optimized Structural Coordinate and its Total Energy for **14** (Rotamer A) at PCM- $\omega$ 97XD/6-311++G(d,p) level  
total energy: HF= -2609.3700401 hartree (NImag = 0)

| Center Number | Atomic Number | Atomic Type | Coordinates (Angstroms) |           |          |
|---------------|---------------|-------------|-------------------------|-----------|----------|
|               |               |             | X                       | Y         | Z        |
| 1             | 1             | 0           | -1.858797               | -0.715042 | 2.265964 |

|    |    |   |           |           |           |
|----|----|---|-----------|-----------|-----------|
| 2  | 6  | 0 | -0.803182 | -0.712739 | 2.503310  |
| 3  | 6  | 0 | 0.150842  | -0.454450 | 1.526417  |
| 4  | 6  | 0 | -0.127927 | -0.172270 | 0.021541  |
| 5  | 6  | 0 | 1.495526  | -0.474199 | 1.876993  |
| 6  | 6  | 0 | 2.397287  | -0.200090 | 0.708173  |
| 7  | 6  | 0 | -0.397258 | -0.974079 | 3.810945  |
| 8  | 6  | 0 | 0.950011  | -0.979520 | 4.149955  |
| 9  | 6  | 0 | 1.909472  | -0.728005 | 3.173654  |
| 10 | 1  | 0 | 2.966596  | -0.733004 | 3.416373  |
| 11 | 6  | 0 | 0.634016  | 1.130712  | -0.358789 |
| 12 | 6  | 0 | 1.958341  | 1.131477  | 0.122536  |
| 13 | 6  | 0 | 2.781407  | 2.223266  | -0.070683 |
| 14 | 17 | 0 | 4.415275  | 2.235583  | 0.559089  |
| 15 | 6  | 0 | 0.272983  | 2.158174  | -1.225611 |
| 16 | 6  | 0 | 1.102876  | 3.266604  | -1.403270 |
| 17 | 6  | 0 | 2.341452  | 3.323757  | -0.797934 |
| 18 | 6  | 0 | 0.709582  | -1.201584 | -0.773420 |
| 19 | 6  | 0 | 2.053210  | -1.222282 | -0.364430 |
| 20 | 6  | 0 | 2.945027  | -2.060298 | -1.006966 |
| 21 | 6  | 0 | 0.313159  | -1.940699 | -1.875852 |
| 22 | 6  | 0 | 1.231200  | -2.774495 | -2.514058 |
| 23 | 6  | 0 | 2.541313  | -2.857154 | -2.074927 |
| 24 | 1  | 0 | 3.449228  | -0.208237 | 0.974731  |
| 25 | 1  | 0 | -1.146479 | -1.174646 | 4.568432  |
| 26 | 1  | 0 | 1.254313  | -1.182184 | 5.170535  |
| 27 | 17 | 0 | -1.127485 | 2.096576  | -2.277024 |
| 28 | 1  | 0 | 0.776899  | 4.073289  | -2.047126 |
| 29 | 1  | 0 | 2.983014  | 4.184208  | -0.936677 |
| 30 | 1  | 0 | -0.692201 | -1.865637 | -2.264919 |
| 31 | 1  | 0 | 0.917408  | -3.361697 | -3.368989 |
| 32 | 1  | 0 | 3.254262  | -3.507751 | -2.565302 |
| 33 | 17 | 0 | 4.626663  | -2.116633 | -0.510784 |
| 34 | 6  | 0 | -1.642343 | -0.159164 | -0.126980 |
| 35 | 6  | 0 | -2.331749 | 0.980352  | 0.278176  |
| 36 | 6  | 0 | -2.356550 | -1.315650 | -0.413311 |
| 37 | 6  | 0 | -3.718687 | 0.985624  | 0.323374  |
| 38 | 6  | 0 | -3.750246 | -1.307060 | -0.365553 |
| 39 | 6  | 0 | -4.450032 | -0.156713 | -0.009979 |
| 40 | 1  | 0 | -5.528807 | -0.151599 | 0.021279  |
| 41 | 1  | 0 | -1.806777 | 1.879542  | 0.575046  |
| 42 | 1  | 0 | -1.869771 | -2.256023 | -0.625350 |
| 43 | 8  | 0 | -4.291265 | 2.153036  | 0.709566  |
| 44 | 8  | 0 | -4.350330 | -2.484095 | -0.673207 |
| 45 | 6  | 0 | -5.702425 | 2.218508  | 0.802037  |
| 46 | 6  | 0 | -5.763296 | -2.557266 | -0.621961 |
| 47 | 1  | 0 | -5.933931 | 3.228000  | 1.135938  |
| 48 | 1  | 0 | -6.173795 | 2.043933  | -0.170635 |
| 49 | 1  | 0 | -6.087792 | 1.499338  | 1.532269  |
| 50 | 1  | 0 | -6.020263 | -3.580172 | -0.889776 |
| 51 | 1  | 0 | -6.136707 | -2.342378 | 0.384646  |
| 52 | 1  | 0 | -6.223404 | -1.869950 | -1.339364 |

**Table S21.** Optimized Structural Coordinate and its Total Energy for **14** (Rotamer B) at PCM- $\omega$ 97XD/6-311++G(d,p) level  
total energy: HF= -2609.3664629 hartree (NImag = 0)

| Center Number | Atomic Number | Atomic Type | Coordinates (Angstroms) |           |           |
|---------------|---------------|-------------|-------------------------|-----------|-----------|
|               |               |             | X                       | Y         | Z         |
| 1             | 1             | 0           | -1.858797               | -0.715042 | 2.265964  |
| 2             | 6             | 0           | -0.803182               | -0.712739 | 2.503310  |
| 3             | 6             | 0           | 0.150842                | -0.454450 | 1.526417  |
| 4             | 6             | 0           | -0.127927               | -0.172270 | 0.021541  |
| 5             | 6             | 0           | 1.495526                | -0.474199 | 1.876993  |
| 6             | 6             | 0           | 2.397287                | -0.200090 | 0.708173  |
| 7             | 6             | 0           | -0.397258               | -0.974079 | 3.810945  |
| 8             | 6             | 0           | 0.950011                | -0.979520 | 4.149955  |
| 9             | 6             | 0           | 1.909472                | -0.728005 | 3.173654  |
| 10            | 1             | 0           | 2.966596                | -0.733004 | 3.416373  |
| 11            | 6             | 0           | 0.634016                | 1.130712  | -0.358789 |
| 12            | 6             | 0           | 1.958341                | 1.131477  | 0.122536  |
| 13            | 6             | 0           | 2.781407                | 2.223266  | -0.070683 |
| 14            | 17            | 0           | 4.415275                | 2.235583  | 0.559089  |
| 15            | 6             | 0           | 0.272983                | 2.158174  | -1.225611 |

|    |    |   |           |           |           |
|----|----|---|-----------|-----------|-----------|
| 16 | 6  | 0 | 1.102876  | 3.266604  | -1.403270 |
| 17 | 6  | 0 | 2.341452  | 3.323757  | -0.797943 |
| 18 | 6  | 0 | 0.709582  | -1.201584 | -0.773420 |
| 19 | 6  | 0 | 2.053210  | -1.222282 | -0.364430 |
| 20 | 6  | 0 | 2.945027  | -2.060298 | -1.006966 |
| 21 | 6  | 0 | 0.313159  | -1.940699 | -1.875852 |
| 22 | 6  | 0 | 1.231200  | -2.774495 | -2.514058 |
| 23 | 6  | 0 | 2.541313  | -2.857154 | -2.074927 |
| 24 | 1  | 0 | 3.449228  | -0.208237 | 0.974731  |
| 25 | 1  | 0 | -1.146479 | -1.174646 | 4.568432  |
| 26 | 1  | 0 | 1.254313  | -1.182184 | 5.170535  |
| 27 | 17 | 0 | -1.127485 | 2.096576  | -2.277024 |
| 28 | 1  | 0 | 0.776899  | 4.073289  | -2.047126 |
| 29 | 1  | 0 | 2.983014  | 4.184208  | -0.936677 |
| 30 | 1  | 0 | -0.692201 | -1.865637 | -2.264919 |
| 31 | 1  | 0 | 0.917408  | -3.361697 | -3.368989 |
| 32 | 1  | 0 | 3.254262  | -3.507751 | -2.565302 |
| 33 | 17 | 0 | 4.626663  | -2.116633 | -0.510784 |
| 34 | 6  | 0 | -1.642343 | -0.159164 | -0.126980 |
| 35 | 6  | 0 | -2.331749 | 0.980352  | 0.278176  |
| 36 | 6  | 0 | -2.356550 | -1.315650 | -0.413311 |
| 37 | 6  | 0 | -3.718687 | 0.985624  | 0.323374  |
| 38 | 6  | 0 | -3.750246 | -1.307060 | -0.365553 |
| 39 | 6  | 0 | -4.450032 | -0.156713 | -0.009979 |
| 40 | 1  | 0 | -5.528807 | -0.151599 | 0.021279  |
| 41 | 1  | 0 | -1.806777 | 1.879542  | 0.575046  |
| 42 | 1  | 0 | -1.869771 | -2.256023 | -0.625350 |
| 43 | 8  | 0 | -4.291265 | 2.153036  | 0.709566  |
| 44 | 8  | 0 | -4.350330 | -2.484095 | -0.673207 |
| 45 | 6  | 0 | -5.702425 | 2.218508  | 0.802037  |
| 46 | 6  | 0 | -5.763296 | -2.557266 | -0.621961 |
| 47 | 1  | 0 | -5.933931 | 3.228000  | 1.135938  |
| 48 | 1  | 0 | -6.173795 | 2.043933  | -0.170635 |
| 49 | 1  | 0 | -6.087792 | 1.499338  | 1.532269  |
| 50 | 1  | 0 | -6.020263 | -3.580172 | -0.889776 |
| 51 | 1  | 0 | -6.136707 | -2.342378 | 0.384646  |
| 52 | 1  | 0 | -6.223404 | -1.869950 | -1.339364 |

**Table S22.** Optimized Structural Coordinate and its Total Energy for **14** (Rotamer C) at PCM- $\omega$ 97XD/6-311++G(d,p) level  
total energy: HF= -2609.37016 hartree (NImag = 0)

| Center Number | Atomic Number | Atomic Type | Coordinates (Angstroms) |           |           |
|---------------|---------------|-------------|-------------------------|-----------|-----------|
|               |               |             | X                       | Y         | Z         |
| 1             | 1             | 0           | -1.493166               | -1.941950 | -1.346216 |
| 2             | 6             | 0           | -0.416484               | -2.040602 | -1.354288 |
| 3             | 6             | 0           | 0.385812                | -1.194443 | -0.600714 |
| 4             | 6             | 0           | -0.119188               | -0.057716 | 0.337965  |
| 5             | 6             | 0           | 1.768907                | -1.357264 | -0.623658 |
| 6             | 6             | 0           | 2.477323                | -0.380755 | 0.268718  |
| 7             | 6             | 0           | 0.171051                | -3.034191 | -2.133565 |
| 8             | 6             | 0           | 1.548069                | -3.192801 | -2.170264 |
| 9             | 6             | 0           | 2.340541                | -2.344818 | -1.406883 |
| 10            | 17            | 0           | 4.081864                | -2.548065 | -1.443371 |
| 11            | 6             | 0           | 0.499780                | -0.341199 | 1.726163  |
| 12            | 6             | 0           | 1.884827                | -0.543507 | 1.660377  |
| 13            | 6             | 0           | 2.630662                | -0.767042 | 2.802577  |
| 14            | 1             | 0           | 3.701729                | -0.922650 | 2.729999  |
| 15            | 6             | 0           | -0.112766               | -0.268727 | 2.968140  |
| 16            | 6             | 0           | 0.638752                | -0.490355 | 4.123711  |
| 17            | 6             | 0           | 1.996893                | -0.759463 | 4.044850  |
| 18            | 6             | 0           | 0.659227                | 1.235534  | -0.040915 |
| 19            | 6             | 0           | 2.041296                | 1.002349  | -0.184940 |
| 20            | 6             | 0           | 2.894680                | 2.017243  | -0.570193 |
| 21            | 6             | 0           | 0.232508                | 2.560112  | -0.071059 |
| 22            | 6             | 0           | 1.096794                | 3.579341  | -0.474968 |
| 23            | 6             | 0           | 2.418709                | 3.309372  | -0.763674 |
| 24            | 1             | 0           | 3.556643                | -0.496706 | 0.262899  |
| 25            | 1             | 0           | -0.456157               | -3.693938 | -2.721451 |
| 26            | 1             | 0           | 2.005206                | -3.963480 | -2.778002 |
| 27            | 1             | 0           | -1.160965               | -0.020109 | 3.060464  |
| 28            | 1             | 0           | 0.150809                | -0.441888 | 5.090561  |
| 29            | 1             | 0           | 2.571685                | -0.934192 | 4.947122  |

|    |    |   |           |           |           |
|----|----|---|-----------|-----------|-----------|
| 30 | 17 | 0 | -1.323336 | 3.094610  | 0.532522  |
| 31 | 1  | 0 | 0.726105  | 4.594614  | -0.533095 |
| 32 | 1  | 0 | 3.086452  | 4.100815  | -1.078248 |
| 33 | 17 | 0 | 4.605843  | 1.714484  | -0.784226 |
| 34 | 6  | 0 | -1.632162 | -0.026257 | 0.177503  |
| 35 | 6  | 0 | -2.464601 | -0.786277 | 0.988901  |
| 36 | 6  | 0 | -2.162122 | 0.582733  | -0.956823 |
| 37 | 6  | 0 | -3.827269 | -0.874442 | 0.705689  |
| 38 | 6  | 0 | -3.518704 | 0.493417  | -1.235166 |
| 39 | 6  | 0 | -4.374644 | -0.228128 | -0.399781 |
| 40 | 1  | 0 | -5.430576 | -0.293539 | -0.612766 |
| 41 | 1  | 0 | -2.087501 | -1.366842 | 1.817502  |
| 42 | 1  | 0 | -1.532795 | 1.126876  | -1.649755 |
| 43 | 8  | 0 | -4.552512 | -1.632147 | 1.565693  |
| 44 | 8  | 0 | -3.935044 | 1.139906  | -2.352579 |
| 45 | 6  | 0 | -5.938308 | -1.792271 | 1.324002  |
| 46 | 6  | 0 | -5.301252 | 1.057674  | -2.714689 |
| 47 | 1  | 0 | -6.308096 | -2.438461 | 2.117598  |
| 48 | 1  | 0 | -6.463230 | -0.832357 | 1.366527  |
| 49 | 1  | 0 | -6.120751 | -2.268796 | 0.355185  |
| 50 | 1  | 0 | -5.401971 | 1.629958  | -3.634733 |
| 51 | 1  | 0 | -5.602563 | 0.021228  | -2.899008 |
| 52 | 1  | 0 | -5.944709 | 1.496734  | -1.945344 |

**Table S23.** Optimized Structural Coordinate and its Total Energy for **14 14** (TS1: a transition state between Rotamers A and B) at PCM- $\omega$ 97XD/6-311++G(d,p) level  
total energy: HF= -2609.3647092 hartree (NImag = 1)

| Center Number | Atomic Number | Atomic Type | Coordinates (Angstroms) |           |           |
|---------------|---------------|-------------|-------------------------|-----------|-----------|
|               |               |             | X                       | Y         | Z         |
| 1             | 1             | 0           | 0.526991                | 3.032821  | -1.012232 |
| 2             | 6             | 0           | -0.494286               | 2.714368  | -0.906076 |
| 3             | 6             | 0           | -0.833139               | 1.481016  | -0.371377 |
| 4             | 6             | 0           | 0.083462                | 0.333154  | 0.147519  |
| 5             | 6             | 0           | -2.197731               | 1.175482  | -0.193920 |
| 6             | 6             | 0           | -2.470943               | -0.142499 | 0.507738  |
| 7             | 6             | 0           | -1.488274               | 3.609483  | -1.303440 |
| 8             | 6             | 0           | -2.826989               | 3.296526  | -1.167308 |
| 9             | 6             | 0           | -3.167265               | 2.072877  | -0.599743 |
| 10            | 17            | 0           | -4.869248               | 1.698598  | -0.393749 |
| 11            | 6             | 0           | -0.366330               | 0.214379  | 1.636845  |
| 12            | 6             | 0           | -1.718823               | -0.060603 | 1.810301  |
| 13            | 6             | 0           | -2.288046               | -0.159739 | 3.068201  |
| 14            | 1             | 0           | -3.344885               | -0.381116 | 3.170763  |
| 15            | 6             | 0           | 0.415551                | 0.465631  | 2.757152  |
| 16            | 6             | 0           | -0.150239               | 0.379937  | 4.028288  |
| 17            | 6             | 0           | -1.490392               | 0.052584  | 4.189237  |
| 18            | 6             | 0           | -0.454435               | -0.922750 | -0.616391 |
| 19            | 6             | 0           | -1.801722               | -1.200573 | -0.331506 |
| 20            | 6             | 0           | -2.438036               | -2.310836 | -0.854575 |
| 21            | 6             | 0           | 0.167475                | -1.727259 | -1.573119 |
| 22            | 6             | 0           | -0.477148               | -2.852908 | -2.087692 |
| 23            | 6             | 0           | -1.768032               | -3.167718 | -1.715805 |
| 24            | 1             | 0           | -3.530256               | -0.330149 | 0.647366  |
| 25            | 1             | 0           | -1.202607               | 4.566490  | -1.723757 |
| 26            | 1             | 0           | -3.600083               | 3.986998  | -1.479267 |
| 27            | 1             | 0           | 1.461059                | 0.724770  | 2.658273  |
| 28            | 1             | 0           | 0.468270                | 0.572656  | 4.897555  |
| 29            | 1             | 0           | -1.919197               | -0.018510 | 5.182323  |
| 30            | 17            | 0           | 1.720558                | -1.391700 | -2.313452 |
| 31            | 1             | 0           | 0.043382                | -3.473788 | -2.805223 |
| 32            | 1             | 0           | -2.259919               | -4.043614 | -2.118362 |
| 33            | 17            | 0           | -4.109233               | -2.655239 | -0.460935 |
| 34            | 6             | 0           | 1.612765                | 0.387538  | 0.103796  |
| 35            | 6             | 0           | 2.389650                | 1.352891  | -0.516703 |
| 36            | 6             | 0           | 2.257021                | -0.680983 | 0.733305  |
| 37            | 6             | 0           | 3.782068                | 1.254616  | -0.503534 |
| 38            | 6             | 0           | 3.638980                | -0.778172 | 0.742347  |
| 39            | 6             | 0           | 4.427412                | 0.196225  | 0.126060  |
| 40            | 1             | 0           | 5.504279                | 0.125053  | 0.132275  |
| 41            | 1             | 0           | 1.982644                | 2.168068  | -1.085723 |
| 42            | 1             | 0           | 1.690622                | -1.469895 | 1.212229  |

|    |   |   |          |           |           |
|----|---|---|----------|-----------|-----------|
| 43 | 8 | 0 | 4.434834 | 2.252207  | -1.151554 |
| 44 | 8 | 0 | 4.151032 | -1.863230 | 1.375469  |
| 45 | 6 | 0 | 5.848979 | 2.213293  | -1.203323 |
| 46 | 6 | 0 | 5.556274 | -2.033565 | 1.398402  |
| 47 | 1 | 0 | 6.152508 | 3.091572  | -1.769576 |
| 48 | 1 | 0 | 6.285325 | 2.262035  | -0.200264 |
| 49 | 1 | 0 | 6.203356 | 1.312714  | -1.715368 |
| 50 | 1 | 0 | 6.050012 | -1.206695 | 1.919438  |
| 51 | 1 | 0 | 5.736804 | -2.958475 | 1.942575  |
| 52 | 1 | 0 | 5.962610 | -2.125329 | 0.385885  |

**Table S24.** Optimized Structural Coordinate and its Total Energy for **14 14** (TS1: a transition state between Rotamers B and C) at PCM- $\omega$ 97XD/6-311++G(d,p) level  
total energy: HF= -2609.3651828 hartree (NImag = 1)

| Center Number | Atomic Number | Atomic Type | Coordinates (Angstroms) |           |           |
|---------------|---------------|-------------|-------------------------|-----------|-----------|
|               |               |             | X                       | Y         | Z         |
| 1             | 1             | 0           | -1.000448               | -1.596822 | 2.897088  |
| 2             | 6             | 0           | 0.052040                | -1.394149 | 2.801580  |
| 3             | 6             | 0           | 0.593985                | -0.799373 | 1.670308  |
| 4             | 6             | 0           | -0.091658               | -0.296908 | 0.365645  |
| 5             | 6             | 0           | 1.990986                | -0.656440 | 1.610206  |
| 6             | 6             | 0           | 2.524287                | -0.113860 | 0.296726  |
| 7             | 6             | 0           | 0.876521                | -1.784491 | 3.859574  |
| 8             | 6             | 0           | 2.247173                | -1.599792 | 3.799867  |
| 9             | 6             | 0           | 2.809914                | -1.039127 | 2.655307  |
| 10            | 1             | 0           | 3.884003                | -0.912397 | 2.572542  |
| 11            | 6             | 0           | 0.451006                | 1.163011  | 0.210228  |
| 12            | 6             | 0           | 1.849227                | 1.216705  | 0.083274  |
| 13            | 6             | 0           | 2.510903                | 2.410373  | -0.136896 |
| 14            | 17            | 0           | 4.251488                | 2.449714  | -0.324184 |
| 15            | 6             | 0           | -0.225668               | 2.383411  | 0.260129  |
| 16            | 6             | 0           | 0.447706                | 3.583365  | 0.027137  |
| 17            | 6             | 0           | 1.808819                | 3.605476  | -0.197698 |
| 18            | 6             | 0           | 0.606378                | -1.178894 | -0.718206 |
| 19            | 6             | 0           | 1.993880                | -1.047142 | -0.759593 |
| 20            | 6             | 0           | 2.735823                | -1.801590 | -1.651130 |
| 21            | 6             | 0           | -0.014750               | -2.124405 | -1.521874 |
| 22            | 6             | 0           | 0.745740                | -2.887966 | -2.404144 |
| 23            | 6             | 0           | 2.119489                | -2.722923 | -2.489259 |
| 24            | 1             | 0           | 3.606907                | -0.037660 | 0.293371  |
| 25            | 1             | 0           | 0.426778                | -2.242105 | 4.733366  |
| 26            | 1             | 0           | 2.879370                | -1.903026 | 4.626377  |
| 27            | 17            | 0           | -1.907295               | 2.584711  | 0.712600  |
| 28            | 1             | 0           | -0.110779               | 4.510234  | 0.043449  |
| 29            | 1             | 0           | 2.322548                | 4.540345  | -0.380261 |
| 30            | 1             | 0           | -1.084264               | -2.274830 | -1.475623 |
| 31            | 1             | 0           | 0.257454                | -3.621259 | -3.035097 |
| 32            | 1             | 0           | 2.710851                | -3.309633 | -3.180801 |
| 33            | 17            | 0           | 4.479733                | -1.629251 | -1.719921 |
| 34            | 6             | 0           | -1.603324               | -0.346092 | 0.135454  |
| 35            | 6             | 0           | -2.564747               | -0.671315 | 1.078647  |
| 36            | 6             | 0           | -2.023230               | 0.016538  | -1.147019 |
| 37            | 6             | 0           | -3.919571               | -0.642237 | 0.744235  |
| 38            | 6             | 0           | -3.368769               | 0.046472  | -1.476069 |
| 39            | 6             | 0           | -4.342363               | -0.290384 | -0.532855 |
| 40            | 1             | 0           | -5.391519               | -0.269802 | -0.785448 |
| 41            | 1             | 0           | -2.336071               | -0.886606 | 2.106090  |
| 42            | 1             | 0           | -1.308753               | 0.303215  | -1.908650 |
| 43            | 8             | 0           | -4.768037               | -0.969259 | 1.751195  |
| 44            | 8             | 0           | -3.658027               | 0.420796  | -2.747566 |
| 45            | 6             | 0           | -6.160540               | -0.940360 | 1.498256  |
| 46            | 6             | 0           | -5.016293               | 0.490662  | -3.140679 |
| 47            | 1             | 0           | -6.641040               | -1.222338 | 2.432994  |
| 48            | 1             | 0           | -6.491407               | 0.062711  | 1.209795  |
| 49            | 1             | 0           | -6.438350               | -1.657604 | 0.718938  |
| 50            | 1             | 0           | -5.011092               | 0.816136  | -4.179046 |
| 51            | 1             | 0           | -5.501623               | -0.488458 | -3.072276 |
| 52            | 1             | 0           | -5.568593               | 1.218257  | -2.537154 |

**Table S25.** Optimized Structural Coordinate and its Total Energy for **14 14** (TS1: a transition state between Rotamers C and A) at PCM- $\omega$ 97XD/6-311++G(d,p) level  
total energy: HF= -2609.3511523 hartree (NImag = 1)

| Center Number | Atomic Number | Atomic Type | Coordinates (Angstroms) |           |           |
|---------------|---------------|-------------|-------------------------|-----------|-----------|
|               |               |             | X                       | Y         | Z         |
| 1             | 17            | 0           | -0.677544               | 3.666954  | -0.670247 |
| 2             | 6             | 0           | 0.785566                | 2.750722  | -0.364183 |
| 3             | 6             | 0           | 0.878136                | 1.388595  | -0.074246 |
| 4             | 6             | 0           | -0.156095               | 0.186564  | 0.095376  |
| 5             | 6             | 0           | 2.205303                | 0.903368  | 0.129617  |
| 6             | 6             | 0           | 2.333501                | -0.577706 | 0.451407  |
| 7             | 6             | 0           | 1.917682                | 3.571353  | -0.444236 |
| 8             | 6             | 0           | 3.181327                | 3.076499  | -0.242426 |
| 9             | 6             | 0           | 3.311202                | 1.725752  | 0.046076  |
| 10            | 17            | 0           | 4.929701                | 1.103473  | 0.302633  |
| 11            | 6             | 0           | 0.384767                | -0.832431 | -0.948044 |
| 12            | 6             | 0           | 1.683360                | -1.272829 | -0.713209 |
| 13            | 6             | 0           | 2.271572                | -2.178737 | -1.580000 |
| 14            | 17            | 0           | 3.900745                | -2.756728 | -1.284624 |
| 15            | 6             | 0           | -0.293119               | -1.250252 | -2.084636 |
| 16            | 6             | 0           | 0.315697                | -2.148374 | -2.955945 |
| 17            | 6             | 0           | 1.591509                | -2.623361 | -2.703099 |
| 18            | 6             | 0           | 0.189924                | -0.323064 | 1.522247  |
| 19            | 6             | 0           | 1.492300                | -0.776039 | 1.683134  |
| 20            | 6             | 0           | 1.950896                | -1.249044 | 2.901805  |
| 21            | 6             | 0           | -0.657882               | -0.288951 | 2.621941  |
| 22            | 6             | 0           | -0.203442               | -0.751533 | 3.854619  |
| 23            | 6             | 0           | 1.088587                | -1.245654 | 3.994237  |
| 24            | 1             | 0           | 3.364665                | -0.878254 | 0.599728  |
| 25            | 1             | 0           | 1.781899                | 4.620259  | -0.671531 |
| 26            | 1             | 0           | 4.048778                | 3.719838  | -0.306789 |
| 27            | 1             | 0           | -1.292419               | -0.892711 | -2.295206 |
| 28            | 1             | 0           | -0.213066               | -2.479749 | -3.841843 |
| 29            | 1             | 0           | 2.062091                | -3.340061 | -3.373850 |
| 30            | 1             | 0           | -1.669979               | 0.084276  | 2.528019  |
| 31            | 1             | 0           | -0.868442               | -0.726474 | 4.710435  |
| 32            | 1             | 0           | 1.430163                | -1.611736 | 4.955755  |
| 33            | 1             | 0           | 2.972751                | -1.599193 | 3.000598  |
| 34            | 6             | 0           | -1.699860               | 0.149849  | -0.018985 |
| 35            | 6             | 0           | -2.589932               | 1.167404  | -0.300467 |
| 36            | 6             | 0           | -2.227762               | -1.132133 | 0.206991  |
| 37            | 6             | 0           | -3.966496               | 0.922383  | -0.355466 |
| 38            | 6             | 0           | -3.588561               | -1.373914 | 0.151332  |
| 39            | 6             | 0           | -4.489643               | -0.342893 | -0.132666 |
| 40            | 1             | 0           | -5.552422               | -0.525757 | -0.175851 |
| 41            | 1             | 0           | -2.275071               | 2.172614  | -0.485763 |
| 42            | 1             | 0           | -1.583099               | -1.971357 | 0.433260  |
| 43            | 8             | 0           | -4.726731               | 2.010359  | -0.640390 |
| 44            | 8             | 0           | -3.970603               | -2.655548 | 0.387799  |
| 45            | 6             | 0           | -6.130575               | 1.849506  | -0.717829 |
| 46            | 6             | 0           | -5.350331               | -2.968733 | 0.348307  |
| 47            | 1             | 0           | -6.533187               | 2.832787  | -0.952898 |
| 48            | 1             | 0           | -6.407297               | 1.146684  | -1.510760 |
| 49            | 1             | 0           | -6.545310               | 1.508063  | 0.236426  |
| 50            | 1             | 0           | -5.421980               | -4.032797 | 0.564960  |
| 51            | 1             | 0           | -5.908567               | -2.408585 | 1.105650  |
| 52            | 1             | 0           | -5.775960               | -2.773309 | -0.641480 |

**Table S26.** Optimized Structural Coordinate and its Total Energy for **12** at B3LYP-D3/6-311++G(d,p) level  
total energy: HF= -1411.0233882 hartree (NImag = 0)

| Center Number | Atomic Number | Atomic Type | Coordinates (Angstroms) |           |           |
|---------------|---------------|-------------|-------------------------|-----------|-----------|
|               |               |             | X                       | Y         | Z         |
| 1             | 6             | 0           | 0.080230                | 0.000002  | 2.488961  |
| 2             | 6             | 0           | 0.988764                | 0.000002  | 1.435364  |
| 3             | 6             | 0           | 0.646172                | -0.000001 | -0.083464 |
| 4             | 6             | 0           | 2.360501                | 0.000003  | 1.711146  |
| 5             | 6             | 0           | 3.213098                | 0.000002  | 0.463124  |
| 6             | 6             | 0           | 0.546749                | 0.000004  | 3.807696  |

|    |   |   |           |           |           |
|----|---|---|-----------|-----------|-----------|
| 7  | 6 | 0 | 1.912329  | 0.000005  | 4.073517  |
| 8  | 6 | 0 | 2.827278  | 0.000005  | 3.017481  |
| 9  | 6 | 0 | 1.415523  | 1.202572  | -0.704213 |
| 10 | 6 | 0 | 2.779978  | 1.205022  | -0.364173 |
| 11 | 6 | 0 | 3.635006  | 2.180629  | -0.852110 |
| 12 | 6 | 0 | 0.947310  | 2.142406  | -1.616162 |
| 13 | 6 | 0 | 1.810443  | 3.125771  | -2.113269 |
| 14 | 6 | 0 | 3.142891  | 3.160452  | -1.719380 |
| 15 | 6 | 0 | 1.415524  | -1.202575 | -0.704210 |
| 16 | 6 | 0 | 2.779979  | -1.205022 | -0.364169 |
| 17 | 6 | 0 | 3.635008  | -2.180629 | -0.852104 |
| 18 | 6 | 0 | 0.947313  | -2.142411 | -1.616156 |
| 19 | 6 | 0 | 1.810447  | -3.125777 | -2.113259 |
| 20 | 6 | 0 | 3.142895  | -3.160456 | -1.719370 |
| 21 | 6 | 0 | -0.869155 | -0.000001 | -0.223539 |
| 22 | 6 | 0 | -1.593839 | 1.196065  | -0.177244 |
| 23 | 6 | 0 | -1.593839 | -1.196067 | -0.177244 |
| 24 | 6 | 0 | -2.983859 | 1.175363  | -0.182340 |
| 25 | 6 | 0 | -2.983860 | -1.175364 | -0.182340 |
| 26 | 6 | 0 | -3.718162 | -0.000000 | -0.198878 |
| 27 | 7 | 0 | -3.715074 | 2.468647  | -0.154174 |
| 28 | 7 | 0 | -3.715075 | -2.468648 | -0.154175 |
| 29 | 1 | 0 | -0.986816 | 0.000001  | 2.309054  |
| 30 | 1 | 0 | 4.281866  | 0.000003  | 0.676601  |
| 31 | 1 | 0 | -0.165483 | 0.000004  | 4.624722  |
| 32 | 1 | 0 | 2.267241  | 0.000007  | 5.097721  |
| 33 | 1 | 0 | 3.894429  | 0.000006  | 3.212439  |
| 34 | 1 | 0 | 4.684392  | 2.166976  | -0.577462 |
| 35 | 1 | 0 | -0.073871 | 2.121430  | -1.972049 |
| 36 | 1 | 0 | 1.430880  | 3.859763  | -2.814615 |
| 37 | 1 | 0 | 3.805425  | 3.927576  | -2.103280 |
| 38 | 1 | 0 | 4.684395  | -2.166973 | -0.577456 |
| 39 | 1 | 0 | -0.073869 | -2.121438 | -1.972044 |
| 40 | 1 | 0 | 1.430885  | -3.859771 | -2.814603 |
| 41 | 1 | 0 | 3.805430  | -3.927579 | -2.103268 |
| 42 | 1 | 0 | -1.096582 | 2.150463  | -0.100953 |
| 43 | 1 | 0 | -1.096584 | -2.150465 | -0.100953 |
| 44 | 1 | 0 | -4.797819 | -0.000000 | -0.205372 |
| 45 | 8 | 0 | -4.936345 | 2.424265  | -0.127818 |
| 46 | 8 | 0 | -3.048106 | 3.494165  | -0.161059 |
| 47 | 8 | 0 | -4.936346 | -2.424265 | -0.127818 |
| 48 | 8 | 0 | -3.048107 | -3.494165 | -0.161060 |

**Table S27.** Optimized Structural Coordinate and its Total Energy for **13** at B3LYP-D3/6-311++G(d,p) level  
total energy: HF= -1112.6519459 hartree (NImag = 0)

| Center Number | Atomic Number | Atomic Type | Coordinates (Angstroms) |           |           |
|---------------|---------------|-------------|-------------------------|-----------|-----------|
|               |               |             | X                       | Y         | Z         |
| 1             | 6             | 0           | -0.639652               | -0.001466 | 2.423628  |
| 2             | 6             | 0           | 0.323556                | -0.003102 | 1.419555  |
| 3             | 6             | 0           | 0.048580                | 0.000205  | -0.112603 |
| 4             | 6             | 0           | 1.677763                | -0.005656 | 1.769135  |
| 5             | 6             | 0           | 2.594374                | -0.003081 | 0.567983  |
| 6             | 6             | 0           | -0.242709               | -0.004006 | 3.764534  |
| 7             | 6             | 0           | 1.107633                | -0.008099 | 4.104318  |
| 8             | 6             | 0           | 2.077050                | -0.008592 | 3.098634  |
| 9             | 6             | 0           | 0.859713                | 1.198225  | -0.691428 |
| 10            | 6             | 0           | 2.204956                | 1.202335  | -0.280056 |
| 11            | 6             | 0           | 3.087845                | 2.173802  | -0.726188 |
| 12            | 6             | 0           | 0.446436                | 2.131259  | -1.636835 |
| 13            | 6             | 0           | 1.337797                | 3.108806  | -2.094245 |
| 14            | 6             | 0           | 2.646816                | 3.147751  | -1.626877 |
| 15            | 6             | 0           | 0.858745                | -1.195389 | -0.698388 |
| 16            | 6             | 0           | 2.203850                | -1.203258 | -0.286744 |
| 17            | 6             | 0           | 3.086091                | -2.172781 | -0.738389 |
| 18            | 6             | 0           | 0.444668                | -2.122403 | -1.649625 |
| 19            | 6             | 0           | 1.335404                | -3.098139 | -2.112195 |
| 20            | 6             | 0           | 2.644275                | -3.141091 | -1.644744 |
| 21            | 6             | 0           | -1.464377               | 0.001166  | -0.323941 |
| 22            | 6             | 0           | -2.176880               | 1.203108  | -0.299484 |
| 23            | 6             | 0           | -2.176351               | -1.201546 | -0.310423 |
| 24            | 6             | 0           | -3.578648               | 1.209796  | -0.333059 |

|    |   |   |           |           |           |
|----|---|---|-----------|-----------|-----------|
| 25 | 6 | 0 | -3.577400 | -1.209409 | -0.345247 |
| 26 | 6 | 0 | -4.276217 | 0.000189  | -0.376097 |
| 27 | 7 | 0 | -4.271918 | 2.422083  | -0.253444 |
| 28 | 7 | 0 | -4.269348 | -2.424278 | -0.398516 |
| 29 | 1 | 0 | -1.692579 | 0.004062  | 2.174743  |
| 30 | 1 | 0 | 3.651258  | -0.004264 | 0.835899  |
| 31 | 1 | 0 | -0.997169 | -0.001392 | 4.543358  |
| 32 | 1 | 0 | 1.407498  | -0.009792 | 5.146350  |
| 33 | 1 | 0 | 3.132899  | -0.010524 | 3.348984  |
| 34 | 1 | 0 | 4.121055  | 2.159068  | -0.395023 |
| 35 | 1 | 0 | -0.556086 | 2.097922  | -2.039976 |
| 36 | 1 | 0 | 1.001113  | 3.834927  | -2.825906 |
| 37 | 1 | 0 | 3.331414  | 3.910417  | -1.980601 |
| 38 | 1 | 0 | 4.119288  | -2.160734 | -0.407027 |
| 39 | 1 | 0 | -0.557564 | -2.087305 | -2.053319 |
| 40 | 1 | 0 | 0.997657  | -3.819737 | -2.847760 |
| 41 | 1 | 0 | 3.328230  | -3.902337 | -2.002786 |
| 42 | 1 | 0 | -1.657711 | 2.145212  | -0.191071 |
| 43 | 1 | 0 | -1.655457 | -2.144717 | -0.222333 |
| 44 | 1 | 0 | -5.361760 | -0.000695 | -0.411224 |
| 45 | 1 | 0 | -5.216456 | 2.410951  | -0.609062 |
| 46 | 1 | 0 | -3.759918 | 3.235659  | -0.561025 |
| 47 | 1 | 0 | -5.212004 | -2.405355 | -0.037541 |
| 48 | 1 | 0 | -3.754755 | -3.227743 | -0.068274 |

**Table S28.** Optimized Structural Coordinate and its Total Energy for phenyltritycene at B3LYP-D3/6-311++G(d,p) level  
total energy: HF= -1001.8936544 hartree (NImag = 0)

| Center Number | Atomic Number | Atomic Type | Coordinates (Angstroms) |           |           |
|---------------|---------------|-------------|-------------------------|-----------|-----------|
|               |               |             | X                       | Y         | Z         |
| 1             | 6             | 0           | -1.190774               | 2.326939  | -0.000003 |
| 2             | 6             | 0           | -0.164973               | 1.386991  | -0.000002 |
| 3             | 6             | 0           | -0.337782               | -0.160140 | 0.000000  |
| 4             | 6             | 0           | 1.164129                | 1.823706  | -0.000003 |
| 5             | 6             | 0           | 2.157020                | 0.684764  | -0.000002 |
| 6             | 6             | 0           | -0.881649               | 3.691076  | -0.000005 |
| 7             | 6             | 0           | 0.443530                | 4.117135  | -0.000006 |
| 8             | 6             | 0           | 1.476021                | 3.176006  | -0.000005 |
| 9             | 6             | 0           | 0.507896                | -0.687567 | -1.197741 |
| 10            | 6             | 0           | 1.823400                | -0.189633 | -1.203230 |
| 11            | 6             | 0           | 2.732681                | -0.579153 | -2.174551 |
| 12            | 6             | 0           | 0.155349                | -1.658048 | -2.129776 |
| 13            | 6             | 0           | 1.073576                | -2.057552 | -3.107872 |
| 14            | 6             | 0           | 2.349727                | -1.507133 | -3.147435 |
| 15            | 6             | 0           | 0.507896                | -0.687563 | 1.197743  |
| 16            | 6             | 0           | 1.823401                | -0.189629 | 1.203229  |
| 17            | 6             | 0           | 2.732682                | -0.579146 | 2.174552  |
| 18            | 6             | 0           | 0.155350                | -1.658042 | 2.129782  |
| 19            | 6             | 0           | 1.073578                | -2.057543 | 3.107878  |
| 20            | 6             | 0           | 2.349729                | -1.507123 | 3.147439  |
| 21            | 6             | 0           | -1.830817               | -0.475990 | 0.000001  |
| 22            | 6             | 0           | -2.559871               | -0.509329 | -1.196935 |
| 23            | 6             | 0           | -2.559871               | -0.509327 | 1.196937  |
| 24            | 6             | 0           | -3.945389               | -0.658627 | -1.199809 |
| 25            | 6             | 0           | -3.945389               | -0.658625 | 1.199811  |
| 26            | 6             | 0           | -4.646001               | -0.752763 | 0.000001  |
| 27            | 1             | 0           | -4.476722               | -0.685330 | -2.144759 |
| 28            | 1             | 0           | -4.476722               | -0.685326 | 2.144762  |
| 29            | 1             | 0           | -2.226538               | 2.014121  | -0.000002 |
| 30            | 1             | 0           | 3.194022                | 1.021256  | -0.000002 |
| 31            | 1             | 0           | -1.685041               | 4.419187  | -0.000005 |
| 32            | 1             | 0           | 0.675441                | 5.176279  | -0.000008 |
| 33            | 1             | 0           | 2.513346                | 3.494322  | -0.000006 |
| 34            | 1             | 0           | 3.742332                | -0.182009 | -2.160994 |
| 35            | 1             | 0           | -0.817709               | -2.128204 | -2.098779 |
| 36            | 1             | 0           | 0.783487                | -2.808823 | -3.833855 |
| 37            | 1             | 0           | 3.055004                | -1.816452 | -3.910469 |
| 38            | 1             | 0           | 3.742334                | -0.182002 | 2.160992  |
| 39            | 1             | 0           | -0.817707               | -2.128198 | 2.098787  |
| 40            | 1             | 0           | 0.783490                | -2.808811 | 3.833863  |
| 41            | 1             | 0           | 3.055006                | -1.816439 | 3.910473  |
| 42            | 1             | 0           | -2.050573               | -0.376973 | -2.141273 |

|    |   |   |           |           |          |
|----|---|---|-----------|-----------|----------|
| 43 | 1 | 0 | -2.050573 | -0.376968 | 2.141275 |
| 44 | 1 | 0 | -5.723568 | -0.871745 | 0.000002 |

**Table S29.** Optimized Structural Coordinate and its Total Energy for *m*-dinitrobenzene at B3LYP-D3/6-311++G(d,p) level  
total energy: HF= -641.4442762 hartree (NImag = 0)

| Center Number | Atomic Number | Atomic Type | Coordinates (Angstroms) |           |           |
|---------------|---------------|-------------|-------------------------|-----------|-----------|
|               |               |             | X                       | Y         | Z         |
| 1             | 6             | 0           | -0.103086               | -1.814253 | -0.347146 |
| 2             | 6             | 0           | 1.121889                | -1.159480 | -0.444402 |
| 3             | 6             | 0           | 1.175386                | 0.205638  | -0.178685 |
| 4             | 6             | 0           | 0.053382                | 0.939501  | 0.179768  |
| 5             | 6             | 0           | -1.149350               | 0.252573  | 0.266361  |
| 6             | 6             | 0           | -1.250930               | -1.111575 | 0.009850  |
| 7             | 7             | 0           | -2.371568               | 1.007161  | 0.647777  |
| 8             | 8             | 0           | -3.419134               | 0.379747  | 0.717325  |
| 9             | 8             | 0           | -2.250108               | 2.203026  | 0.866565  |
| 10            | 7             | 0           | 2.480455                | 0.909203  | -0.281092 |
| 11            | 8             | 0           | 2.495014                | 2.107226  | -0.041837 |
| 12            | 8             | 0           | 3.454405                | 0.240977  | -0.598545 |
| 13            | 1             | 0           | -0.163413               | -2.875979 | -0.550300 |
| 14            | 1             | 0           | 2.026398                | -1.684068 | -0.719833 |
| 15            | 1             | 0           | 0.113570                | 1.998784  | 0.382454  |
| 16            | 1             | 0           | -2.212912               | -1.598480 | 0.091739  |

**Table S30.** Optimized Structural Coordinate and its Total Energy for *m*-diaminobenzene at B3LYP-D3/6-311++G(d,p) level  
total energy: HF= -343.0736928 hartree (NImag = 0)

| Center Number | Atomic Number | Atomic Type | Coordinates (Angstroms) |           |           |
|---------------|---------------|-------------|-------------------------|-----------|-----------|
|               |               |             | X                       | Y         | Z         |
| 1             | 6             | 0           | -0.100819               | -1.774191 | -0.339516 |
| 2             | 6             | 0           | 1.138779                | -1.144239 | -0.379664 |
| 3             | 6             | 0           | 1.220832                | 0.232155  | -0.118342 |
| 4             | 6             | 0           | 0.053650                | 0.944129  | 0.180672  |
| 5             | 6             | 0           | -1.190351               | 0.304236  | 0.220988  |
| 6             | 6             | 0           | -1.264707               | -1.071816 | -0.044408 |
| 7             | 7             | 0           | -2.353217               | 1.043328  | 0.465777  |
| 8             | 1             | 0           | -3.139206               | 0.509053  | 0.805911  |
| 9             | 1             | 0           | -2.224673               | 1.897945  | 0.987535  |
| 10            | 7             | 0           | 2.462374                | 0.877601  | -0.098182 |
| 11            | 1             | 0           | 2.438948                | 1.872805  | -0.265951 |
| 12            | 1             | 0           | 3.192202                | 0.423560  | -0.627443 |
| 13            | 1             | 0           | -0.161267               | -2.837929 | -0.543076 |
| 14            | 1             | 0           | 2.037095                | -1.708681 | -0.604619 |
| 15            | 1             | 0           | 0.114200                | 2.009659  | 0.384575  |
| 16            | 1             | 0           | -2.223840               | -1.577612 | -0.024257 |

**Table S31.** Optimized Structural Coordinate and its Total Energy for benzene at B3LYP-D3/6-311++G(d,p) level  
total energy: HF= -232.3163902 hartree (NImag = 0)

| Center Number | Atomic Number | Atomic Type | Coordinates (Angstroms) |           |          |
|---------------|---------------|-------------|-------------------------|-----------|----------|
|               |               |             | X                       | Y         | Z        |
| 1             | 6             | 0           | -0.000000               | 1.394918  | 0.000000 |
| 2             | 6             | 0           | 1.208035                | 0.697459  | 0.000000 |
| 3             | 6             | 0           | 1.208035                | -0.697459 | 0.000000 |
| 4             | 6             | 0           | -0.000000               | -1.394918 | 0.000000 |
| 5             | 6             | 0           | -1.208035               | -0.697459 | 0.000000 |
| 6             | 6             | 0           | -1.208035               | 0.697459  | 0.000000 |
| 7             | 1             | 0           | -0.000000               | 2.479334  | 0.000000 |
| 8             | 1             | 0           | 2.147166                | 1.239667  | 0.000000 |
| 9             | 1             | 0           | 2.147166                | -1.239667 | 0.000000 |
| 10            | 1             | 0           | -0.000000               | -2.479334 | 0.000000 |
| 11            | 1             | 0           | -2.147166               | -1.239667 | 0.000000 |
| 12            | 1             | 0           | -2.147166               | 1.239667  | 0.000000 |

**Table S32.** Optimized Structural Coordinate and its Total Energy for **14** (Rotamer A) at B3LYP-D3/6-311++G(d,p) level  
total energy: HF= -2609.8806517 hartree (NImag = 0)

| Center Number | Atomic Number | Atomic Type | Coordinates (Angstroms) |           |           |
|---------------|---------------|-------------|-------------------------|-----------|-----------|
|               |               |             | X                       | Y         | Z         |
| 1             | 1             | 0           | -1.845940               | -0.717694 | 2.289389  |
| 2             | 6             | 0           | -0.790434               | -0.716821 | 2.521972  |
| 3             | 6             | 0           | 0.159446                | -0.457850 | 1.536485  |
| 4             | 6             | 0           | -0.130723               | -0.171999 | 0.026907  |
| 5             | 6             | 0           | 1.511003                | -0.478465 | 1.878955  |
| 6             | 6             | 0           | 2.408031                | -0.201869 | 0.702085  |
| 7             | 6             | 0           | -0.375143               | -0.980081 | 3.830274  |
| 8             | 6             | 0           | 0.977657                | -0.986950 | 4.161494  |
| 9             | 6             | 0           | 1.933085                | -0.734448 | 3.176340  |
| 10            | 1             | 0           | 2.991690                | -0.739859 | 3.411612  |
| 11            | 6             | 0           | 0.634005                | 1.137935  | -0.356289 |
| 12            | 6             | 0           | 1.965669                | 1.136883  | 0.121081  |
| 13            | 6             | 0           | 2.789779                | 2.233410  | -0.071168 |
| 14            | 17            | 0           | 4.435069                | 2.252996  | 0.557280  |
| 15            | 6             | 0           | 0.267392                | 2.170749  | -1.221719 |
| 16            | 6             | 0           | 1.100048                | 3.282387  | -1.400085 |
| 17            | 6             | 0           | 2.344265                | 3.337611  | -0.797563 |
| 18            | 6             | 0           | 0.707444                | -1.202921 | -0.778439 |
| 19            | 6             | 0           | 2.057501                | -1.226273 | -0.373737 |
| 20            | 6             | 0           | 2.948194                | -2.068053 | -1.022023 |
| 21            | 6             | 0           | 0.304712                | -1.940854 | -1.884262 |
| 22            | 6             | 0           | 1.222005                | -2.775583 | -2.530295 |
| 23            | 6             | 0           | 2.536958                | -2.862324 | -2.094304 |
| 24            | 1             | 0           | 3.461235                | -0.210626 | 0.960080  |
| 25            | 1             | 0           | -1.119672               | -1.180685 | 4.592437  |
| 26            | 1             | 0           | 1.288734                | -1.190734 | 5.179838  |
| 27            | 17            | 0           | -1.145271               | 2.112161  | -2.273136 |
| 28            | 1             | 0           | 0.769546                | 4.089139  | -2.041175 |
| 29            | 1             | 0           | 2.987499                | 4.196898  | -0.933853 |
| 30            | 1             | 0           | -0.702598               | -1.861450 | -2.265390 |
| 31            | 1             | 0           | 0.904349                | -3.359810 | -3.386157 |
| 32            | 1             | 0           | 3.249153                | -3.511859 | -2.586328 |
| 33            | 17            | 0           | 4.640878                | -2.137263 | -0.529609 |
| 34            | 6             | 0           | -1.649500               | -0.160705 | -0.117351 |
| 35            | 6             | 0           | -2.345173               | 0.982105  | 0.281457  |
| 36            | 6             | 0           | -2.365945               | -1.322726 | -0.397979 |
| 37            | 6             | 0           | -3.735218               | 0.986291  | 0.323103  |
| 38            | 6             | 0           | -3.762042               | -1.315961 | -0.354636 |
| 39            | 6             | 0           | -4.466946               | -0.161427 | -0.006356 |
| 40            | 1             | 0           | -5.544810               | -0.156922 | 0.019483  |
| 41            | 1             | 0           | -1.825991               | 1.885806  | 0.568919  |
| 42            | 1             | 0           | -1.879901               | -2.263421 | -0.604500 |
| 43            | 8             | 0           | -4.308321               | 2.166270  | 0.703266  |
| 44            | 8             | 0           | -4.359209               | -2.506256 | -0.661243 |
| 45            | 6             | 0           | -5.724126               | 2.246720  | 0.787789  |
| 46            | 6             | 0           | -5.776252               | -2.595551 | -0.609771 |
| 47            | 1             | 0           | -5.945349               | 3.262805  | 1.110790  |
| 48            | 1             | 0           | -6.195600               | 2.067876  | -0.185524 |
| 49            | 1             | 0           | -6.124374               | 1.539165  | 1.523349  |
| 50            | 1             | 0           | -6.019558               | -3.623144 | -0.875427 |
| 51            | 1             | 0           | -6.155787               | -2.383053 | 0.396473  |
| 52            | 1             | 0           | -6.248054               | -1.916112 | -1.329084 |

**Table S33.** Optimized Structural Coordinate and its Total Energy for **14** (Rotamer B) at B3LYP-D3/6-311++G(d,p) level  
total energy: HF= -2609.8774532 hartree (NImag = 0)

| Center Number | Atomic Number | Atomic Type | Coordinates (Angstroms) |           |           |
|---------------|---------------|-------------|-------------------------|-----------|-----------|
|               |               |             | X                       | Y         | Z         |
| 1             | 17            | 0           | -2.052777               | 2.255240  | -1.183578 |
| 2             | 6             | 0           | -0.302389               | 2.154866  | -0.977460 |
| 3             | 6             | 0           | 0.411670                | 1.110141  | -0.368163 |
| 4             | 6             | 0           | -0.080745               | -0.241582 | 0.285643  |
| 5             | 6             | 0           | 1.815785                | 1.259253  | -0.304811 |
| 6             | 6             | 0           | 2.523687                | 0.114689  | 0.375167  |
| 7             | 6             | 0           | 0.364567                | 3.272732  | -1.496449 |

|    |    |   |           |           |           |
|----|----|---|-----------|-----------|-----------|
| 8  | 6  | 0 | 1.738817  | 3.392462  | -1.425667 |
| 9  | 6  | 0 | 2.463269  | 2.372258  | -0.820549 |
| 10 | 17 | 0 | 4.214907  | 2.537100  | -0.725591 |
| 11 | 6  | 0 | 0.748096  | -1.387648 | -0.387777 |
| 12 | 6  | 0 | 2.133089  | -1.147863 | -0.371431 |
| 13 | 6  | 0 | 3.006889  | -2.090309 | -0.893328 |
| 14 | 17 | 0 | 4.746888  | -1.799695 | -0.893151 |
| 15 | 6  | 0 | 0.279819  | -2.622571 | -0.825327 |
| 16 | 6  | 0 | 1.174896  | -3.566811 | -1.336195 |
| 17 | 6  | 0 | 2.536148  | -3.302371 | -1.397837 |
| 18 | 6  | 0 | 0.522132  | -0.278557 | 1.729189  |
| 19 | 6  | 0 | 1.903893  | -0.038977 | 1.752269  |
| 20 | 6  | 0 | 2.630011  | -0.071862 | 2.932983  |
| 21 | 6  | 0 | -0.100973 | -0.668173 | 2.912341  |
| 22 | 6  | 0 | 0.627443  | -0.710815 | 4.106244  |
| 23 | 6  | 0 | 1.980412  | -0.390637 | 4.127502  |
| 24 | 1  | 0 | 3.597224  | 0.257615  | 0.419125  |
| 25 | 1  | 0 | -0.220120 | 4.056121  | -1.960060 |
| 26 | 1  | 0 | 2.242234  | 4.260905  | -1.829413 |
| 27 | 1  | 0 | -0.767492 | -2.874437 | -0.760842 |
| 28 | 1  | 0 | 0.800471  | -4.521739 | -1.686497 |
| 29 | 1  | 0 | 3.232383  | -4.026841 | -1.799812 |
| 30 | 1  | 0 | -1.139825 | -0.961396 | 2.924778  |
| 31 | 1  | 0 | 0.125061  | -1.005330 | 5.020740  |
| 32 | 1  | 0 | 2.535797  | -0.420413 | 5.057929  |
| 33 | 1  | 0 | 3.697259  | 0.120134  | 2.916216  |
| 34 | 6  | 0 | -1.598152 | -0.392635 | 0.188873  |
| 35 | 6  | 0 | -2.182001 | -0.915117 | -0.967124 |
| 36 | 6  | 0 | -2.430154 | 0.144382  | 1.172321  |
| 37 | 6  | 0 | -3.566713 | -0.946032 | -1.111349 |
| 38 | 6  | 0 | -3.815074 | 0.112052  | 1.025073  |
| 39 | 6  | 0 | -4.405932 | -0.446609 | -0.111407 |
| 40 | 1  | 0 | -5.478112 | -0.474340 | -0.222306 |
| 41 | 1  | 0 | -1.590464 | -1.234963 | -1.811099 |
| 42 | 1  | 0 | -2.037645 | 0.670811  | 2.027992  |
| 43 | 8  | 0 | -4.019612 | -1.474971 | -2.286926 |
| 44 | 8  | 0 | -4.523525 | 0.673128  | 2.049690  |
| 45 | 6  | 0 | -5.416990 | -1.478915 | -2.543875 |
| 46 | 6  | 0 | -5.939086 | 0.740709  | 1.948543  |
| 47 | 1  | 0 | -5.536270 | -1.916407 | -3.533869 |
| 48 | 1  | 0 | -5.958917 | -2.090319 | -1.812873 |
| 49 | 1  | 0 | -5.827116 | -0.462443 | -2.546168 |
| 50 | 1  | 0 | -6.278547 | 1.241087  | 2.854132  |
| 51 | 1  | 0 | -6.251413 | 1.324049  | 1.074676  |
| 52 | 1  | 0 | -6.387210 | -0.258652 | 1.900272  |

**Table S34.** Optimized Structural Coordinate and its Total Energy for **14** (Rotamer C) at B3LYP-D3/6-311++G(d,p) level  
total energy: HF= -2609.8807348 hartree (NImag = 0)

| Center Number | Atomic Number | Atomic Type | Coordinates (Angstroms) |           |           |
|---------------|---------------|-------------|-------------------------|-----------|-----------|
|               |               |             | X                       | Y         | Z         |
| 1             | 1             | 0           | -1.476497               | -1.943461 | -1.390636 |
| 2             | 6             | 0           | -0.400639               | -2.038958 | -1.396285 |
| 3             | 6             | 0           | 0.396093                | -1.195540 | -0.627533 |
| 4             | 6             | 0           | -0.122011               | -0.068540 | 0.327971  |
| 5             | 6             | 0           | 1.785043                | -1.351200 | -0.645407 |
| 6             | 6             | 0           | 2.486511                | -0.378027 | 0.263301  |
| 7             | 6             | 0           | 0.197777                | -3.024017 | -2.184972 |
| 8             | 6             | 0           | 1.579170                | -3.177458 | -2.214629 |
| 9             | 6             | 0           | 2.367422                | -2.332399 | -1.436225 |
| 10            | 17            | 0           | 4.118613                | -2.536834 | -1.464700 |
| 11            | 6             | 0           | 0.498686                | -0.366696 | 1.720007  |
| 12            | 6             | 0           | 1.889569                | -0.561776 | 1.655359  |
| 13            | 6             | 0           | 2.634582                | -0.795272 | 2.800387  |
| 14            | 1             | 0           | 3.706400                | -0.944508 | 2.728010  |
| 15            | 6             | 0           | -0.118133               | -0.311966 | 2.965017  |
| 16            | 6             | 0           | 0.633306                | -0.543165 | 4.123086  |
| 17            | 6             | 0           | 1.996724                | -0.804951 | 4.044544  |
| 18            | 6             | 0           | 0.655463                | 1.239909  | -0.033348 |
| 19            | 6             | 0           | 2.044916                | 1.014362  | -0.175034 |
| 20            | 6             | 0           | 2.898372                | 2.042649  | -0.539282 |
| 21            | 6             | 0           | 0.220009                | 2.566693  | -0.046286 |

|    |    |   |           |           |           |
|----|----|---|-----------|-----------|-----------|
| 22 | 6  | 0 | 1.084918  | 3.598561  | -0.431121 |
| 23 | 6  | 0 | 2.413768  | 3.338711  | -0.714846 |
| 24 | 1  | 0 | 3.565463  | -0.488712 | 0.256412  |
| 25 | 1  | 0 | -0.423248 | -3.680325 | -2.783625 |
| 26 | 1  | 0 | 2.046026  | -3.939335 | -2.825396 |
| 27 | 1  | 0 | -1.167378 | -0.069809 | 3.053878  |
| 28 | 1  | 0 | 0.142614  | -0.508246 | 5.089188  |
| 29 | 1  | 0 | 2.570393  | -0.987005 | 4.946108  |
| 30 | 17 | 0 | -1.349728 | 3.088698  | 0.560022  |
| 31 | 1  | 0 | 0.707141  | 4.611678  | -0.475352 |
| 32 | 1  | 0 | 3.082253  | 4.135778  | -1.012355 |
| 33 | 17 | 0 | 4.624134  | 1.758741  | -0.746398 |
| 34 | 6  | 0 | -1.638910 | -0.041912 | 0.166663  |
| 35 | 6  | 0 | -2.471854 | -0.820155 | 0.968033  |
| 36 | 6  | 0 | -2.177421 | 0.588173  | -0.956969 |
| 37 | 6  | 0 | -3.838249 | -0.903075 | 0.689757  |
| 38 | 6  | 0 | -3.538226 | 0.504831  | -1.231064 |
| 39 | 6  | 0 | -4.393132 | -0.234489 | -0.404002 |
| 40 | 1  | 0 | -5.449274 | -0.294537 | -0.612420 |
| 41 | 1  | 0 | -2.093608 | -1.413895 | 1.785312  |
| 42 | 1  | 0 | -1.555587 | 1.151780  | -1.638662 |
| 43 | 8  | 0 | -4.560293 | -1.682847 | 1.548579  |
| 44 | 8  | 0 | -3.956857 | 1.180852  | -2.341496 |
| 45 | 6  | 0 | -5.953668 | -1.843759 | 1.322191  |
| 46 | 6  | 0 | -5.331263 | 1.132876  | -2.697769 |
| 47 | 1  | 0 | -6.309262 | -2.503317 | 2.112281  |
| 48 | 1  | 0 | -6.484207 | -0.886636 | 1.385861  |
| 49 | 1  | 0 | -6.151671 | -2.307104 | 0.348597  |
| 50 | 1  | 0 | -5.424695 | 1.730789  | -3.603009 |
| 51 | 1  | 0 | -5.657213 | 0.107372  | -2.907558 |
| 52 | 1  | 0 | -5.964730 | 1.564678  | -1.914296 |

**Table S35.** Optimized Structural Coordinate and its Total Energy for **14 14** (TS1: a transition state between Rotamers A and B) at B3LYP-D3/6-311++G(d,p) level  
total energy: HF= hartree (NImag = 1)

| Center Number | Atomic Number | Atomic Type | Coordinates (Angstroms) |           |           |
|---------------|---------------|-------------|-------------------------|-----------|-----------|
|               |               |             | X                       | Y         | Z         |
| 1             | 1             | 0           | 0.523001                | 3.037228  | -1.012485 |
| 2             | 6             | 0           | -0.499134               | 2.724986  | -0.901810 |
| 3             | 6             | 0           | -0.837738               | 1.489639  | -0.361818 |
| 4             | 6             | 0           | 0.084610                | 0.338704  | 0.158938  |
| 5             | 6             | 0           | -2.207209               | 1.179440  | -0.188165 |
| 6             | 6             | 0           | -2.479140               | -0.150399 | 0.503509  |
| 7             | 6             | 0           | -1.496440               | 3.621998  | -1.299119 |
| 8             | 6             | 0           | -2.838437               | 3.308443  | -1.158837 |
| 9             | 6             | 0           | -3.180486               | 2.080371  | -0.592058 |
| 10            | 17            | 0           | -4.893845               | 1.709765  | -0.387061 |
| 11            | 6             | 0           | -0.375922               | 0.204925  | 1.651172  |
| 12            | 6             | 0           | -1.732839               | -0.077525 | 1.814477  |
| 13            | 6             | 0           | -2.309058               | -0.191280 | 3.071827  |
| 14            | 1             | 0           | -3.365429               | -0.417817 | 3.165581  |
| 15            | 6             | 0           | 0.400997                | 0.447027  | 2.781477  |
| 16            | 6             | 0           | -0.173160               | 0.346852  | 4.051994  |
| 17            | 6             | 0           | -1.516646               | 0.013239  | 4.202537  |
| 18            | 6             | 0           | -0.448775               | -0.917757 | -0.623381 |
| 19            | 6             | 0           | -1.801111               | -1.203833 | -0.344399 |
| 20            | 6             | 0           | -2.431559               | -2.316159 | -0.881119 |
| 21            | 6             | 0           | 0.183155                | -1.709345 | -1.590414 |
| 22            | 6             | 0           | -0.457515               | -2.835285 | -2.120669 |
| 23            | 6             | 0           | -1.751108               | -3.160721 | -1.753433 |
| 24            | 1             | 0           | -3.537746               | -0.343242 | 0.634115  |
| 25            | 1             | 0           | -1.212025               | 4.578651  | -1.721785 |
| 26            | 1             | 0           | -3.614187               | 3.996857  | -1.467434 |
| 27            | 1             | 0           | 1.445630                | 0.708924  | 2.689275  |
| 28            | 1             | 0           | 0.440114                | 0.532127  | 4.926620  |
| 29            | 1             | 0           | -1.950977               | -0.069159 | 5.192375  |
| 30            | 17            | 0           | 1.746193                | -1.353582 | -2.323254 |
| 31            | 1             | 0           | 0.069097                | -3.444029 | -2.843838 |
| 32            | 1             | 0           | -2.240480               | -4.033980 | -2.164131 |
| 33            | 17            | 0           | -4.110268               | -2.684488 | -0.494742 |
| 34            | 6             | 0           | 1.617051                | 0.396290  | 0.123866  |

|    |   |   |          |           |           |
|----|---|---|----------|-----------|-----------|
| 35 | 6 | 0 | 2.398647 | 1.374243  | -0.479461 |
| 36 | 6 | 0 | 2.263442 | -0.685986 | 0.737046  |
| 37 | 6 | 0 | 3.792955 | 1.272504  | -0.472571 |
| 38 | 6 | 0 | 3.647944 | -0.787539 | 0.739582  |
| 39 | 6 | 0 | 4.439491 | 0.197335  | 0.135935  |
| 40 | 1 | 0 | 5.515063 | 0.122665  | 0.135545  |
| 41 | 1 | 0 | 1.993016 | 2.202424  | -1.028218 |
| 42 | 1 | 0 | 1.698579 | -1.484045 | 1.199394  |
| 43 | 8 | 0 | 4.446712 | 2.289964  | -1.109459 |
| 44 | 8 | 0 | 4.156752 | -1.895185 | 1.356083  |
| 45 | 6 | 0 | 5.865136 | 2.253713  | -1.181411 |
| 46 | 6 | 0 | 5.563779 | -2.091800 | 1.362332  |
| 47 | 1 | 0 | 6.158093 | 3.144721  | -1.734595 |
| 48 | 1 | 0 | 6.318943 | 2.283351  | -0.183942 |
| 49 | 1 | 0 | 6.217090 | 1.364191  | -1.716636 |
| 50 | 1 | 0 | 6.080732 | -1.286540 | 1.897362  |
| 51 | 1 | 0 | 5.730091 | -3.032347 | 1.885241  |
| 52 | 1 | 0 | 5.962748 | -2.169488 | 0.344378  |

**Table S36.** Optimized Structural Coordinate and its Total Energy for **14 14** (TS1: a transition state between Rotamers B and C) at B3LYP-D3/6-311++G(d,p) level  
total energy: HF= -2609.876139 hartree (NImag = 1)

| Center Number | Atomic Number | Atomic Type | Coordinates (Angstroms) |           |           |
|---------------|---------------|-------------|-------------------------|-----------|-----------|
|               |               |             | X                       | Y         | Z         |
| 1             | 1             | 0           | -0.996911               | -1.605363 | 2.899152  |
| 2             | 6             | 0           | 0.056478                | -1.411139 | 2.802895  |
| 3             | 6             | 0           | 0.597882                | -0.819732 | 1.665093  |
| 4             | 6             | 0           | -0.093085               | -0.313628 | 0.357112  |
| 5             | 6             | 0           | 1.999138                | -0.671365 | 1.604821  |
| 6             | 6             | 0           | 2.531112                | -0.113624 | 0.291697  |
| 7             | 6             | 0           | 0.884047                | -1.802122 | 3.862876  |
| 8             | 6             | 0           | 2.258511                | -1.618848 | 3.800065  |
| 9             | 6             | 0           | 2.820464                | -1.054956 | 2.652423  |
| 10            | 1             | 0           | 3.893932                | -0.924810 | 2.569091  |
| 11            | 6             | 0           | 0.444271                | 1.158412  | 0.217348  |
| 12            | 6             | 0           | 1.847653                | 1.221081  | 0.091639  |
| 13            | 6             | 0           | 2.504407                | 2.425863  | -0.108144 |
| 14            | 17            | 0           | 4.255283                | 2.487449  | -0.289894 |
| 15            | 6             | 0           | -0.243233               | 2.376557  | 0.288061  |
| 16            | 6             | 0           | 0.425979                | 3.587287  | 0.073996  |
| 17            | 6             | 0           | 1.790865                | 3.620189  | -0.149131 |
| 18            | 6             | 0           | 0.615497                | -1.185053 | -0.738734 |
| 19            | 6             | 0           | 2.007059                | -1.043795 | -0.776645 |
| 20            | 6             | 0           | 2.758286                | -1.788989 | -1.674801 |
| 21            | 6             | 0           | -0.000650               | -2.127863 | -1.555813 |
| 22            | 6             | 0           | 0.768860                | -2.880941 | -2.445475 |
| 23            | 6             | 0           | 2.145659                | -2.708321 | -2.524676 |
| 24            | 1             | 0           | 3.612377                | -0.030775 | 0.286874  |
| 25            | 1             | 0           | 0.435412                | -2.256677 | 4.738935  |
| 26            | 1             | 0           | 2.892112                | -1.921852 | 4.625638  |
| 27            | 17            | 0           | -1.935380               | 2.558179  | 0.747206  |
| 28            | 1             | 0           | -0.139392               | 4.509345  | 0.105841  |
| 29            | 1             | 0           | 2.302585                | 4.558917  | -0.315443 |
| 30            | 1             | 0           | -1.068813               | -2.282884 | -1.512855 |
| 31            | 1             | 0           | 0.285957                | -3.610506 | -3.085245 |
| 32            | 1             | 0           | 2.744655                | -3.284306 | -3.218068 |
| 33            | 17            | 0           | 4.511583                | -1.611533 | -1.740061 |
| 34            | 6             | 0           | -1.607013               | -0.368455 | 0.122643  |
| 35            | 6             | 0           | -2.571965               | -0.718152 | 1.059228  |
| 36            | 6             | 0           | -2.029919               | 0.022093  | -1.155436 |
| 37            | 6             | 0           | -3.929392               | -0.677530 | 0.727459  |
| 38            | 6             | 0           | -3.378489               | 0.064659  | -1.482335 |
| 39            | 6             | 0           | -4.354544               | -0.290781 | -0.543185 |
| 40            | 1             | 0           | -5.402953               | -0.258812 | -0.792730 |
| 41            | 1             | 0           | -2.343219               | -0.963524 | 2.078672  |
| 42            | 1             | 0           | -1.318138               | 0.328556  | -1.909992 |
| 43            | 8             | 0           | -4.779399               | -1.030935 | 1.737525  |
| 44            | 8             | 0           | -3.664513               | 0.473659  | -2.753919 |
| 45            | 6             | 0           | -6.179731               | -0.985401 | 1.502117  |
| 46            | 6             | 0           | -5.024547               | 0.586742  | -3.149016 |
| 47            | 1             | 0           | -6.648716               | -1.291618 | 2.435926  |

|    |   |   |           |           |           |
|----|---|---|-----------|-----------|-----------|
| 48 | 1 | 0 | -6.510825 | 0.027901  | 1.246806  |
| 49 | 1 | 0 | -6.476088 | -1.678194 | 0.705880  |
| 50 | 1 | 0 | -5.006451 | 0.940600  | -4.178664 |
| 51 | 1 | 0 | -5.537075 | -0.381639 | -3.110430 |
| 52 | 1 | 0 | -5.564026 | 1.311103  | -2.528003 |

**Table S37.** Optimized Structural Coordinate and its Total Energy for **14 14** (TS1: a transition state between Rotamers C and A) at B3LYP-D3/6-311++G(d,p) level  
total energy: HF= -2609.8616669 hartree (NImag = 1)

| Center Number | Atomic Number | Atomic Type | Coordinates (Angstroms) |           |           |
|---------------|---------------|-------------|-------------------------|-----------|-----------|
|               |               |             | X                       | Y         | Z         |
| 1             | 17            | 0           | -0.699373               | 3.678045  | -0.671552 |
| 2             | 6             | 0           | 0.775276                | 2.759883  | -0.363130 |
| 3             | 6             | 0           | 0.875095                | 1.393333  | -0.073893 |
| 4             | 6             | 0           | -0.160038               | 0.180188  | 0.097660  |
| 5             | 6             | 0           | 2.209667                | 0.910580  | 0.128500  |
| 6             | 6             | 0           | 2.342462                | -0.576790 | 0.447374  |
| 7             | 6             | 0           | 1.908251                | 3.586769  | -0.441808 |
| 8             | 6             | 0           | 3.176932                | 3.094723  | -0.239381 |
| 9             | 6             | 0           | 3.315387                | 1.740477  | 0.047430  |
| 10            | 17            | 0           | 4.949218                | 1.129015  | 0.305743  |
| 11            | 6             | 0           | 0.386023                | -0.838122 | -0.953829 |
| 12            | 6             | 0           | 1.691193                | -1.275722 | -0.720082 |
| 13            | 6             | 0           | 2.283385                | -2.182734 | -1.589581 |
| 14            | 17            | 0           | 3.921456                | -2.765871 | -1.296080 |
| 15            | 6             | 0           | -0.293134               | -1.257185 | -2.093699 |
| 16            | 6             | 0           | 0.320592                | -2.154331 | -2.969005 |
| 17            | 6             | 0           | 1.600846                | -2.636840 | -2.716286 |
| 18            | 6             | 0           | 0.194654                | -0.330870 | 1.529134  |
| 19            | 6             | 0           | 1.503815                | -0.781230 | 1.684600  |
| 20            | 6             | 0           | 1.969255                | -1.255818 | 2.903929  |
| 21            | 6             | 0           | -0.649690               | -0.299983 | 2.636209  |
| 22            | 6             | 0           | -0.187047               | -0.764257 | 3.869666  |
| 23            | 6             | 0           | 1.109844                | -1.256787 | 4.003397  |
| 24            | 1             | 0           | 3.374339                | -0.874603 | 0.590228  |
| 25            | 1             | 0           | 1.768292                | 4.635270  | -0.667684 |
| 26            | 1             | 0           | 4.043514                | 3.739164  | -0.301365 |
| 27            | 1             | 0           | -1.293348               | -0.902374 | -2.300282 |
| 28            | 1             | 0           | -0.207537               | -2.486015 | -3.855447 |
| 29            | 1             | 0           | 2.075501                | -3.342680 | -3.385522 |
| 30            | 1             | 0           | -1.661947               | 0.071258  | 2.547262  |
| 31            | 1             | 0           | -0.848405               | -0.741640 | 4.728414  |
| 32            | 1             | 0           | 1.456742                | -1.623565 | 4.962758  |
| 33            | 1             | 0           | 2.992591                | -1.602582 | 2.996947  |
| 34            | 6             | 0           | -1.707471               | 0.141257  | -0.014842 |
| 35            | 6             | 0           | -2.598364               | 1.163078  | -0.296667 |
| 36            | 6             | 0           | -2.239771               | -1.143799 | 0.210734  |
| 37            | 6             | 0           | -3.977677               | 0.921533  | -0.353237 |
| 38            | 6             | 0           | -3.604723               | -1.382650 | 0.153412  |
| 39            | 6             | 0           | -4.505573               | -0.347066 | -0.131445 |
| 40            | 1             | 0           | -5.567543               | -0.528038 | -0.176395 |
| 41            | 1             | 0           | -2.281324               | 2.166706  | -0.480389 |
| 42            | 1             | 0           | -1.600019               | -1.985233 | 0.436846  |
| 43            | 8             | 0           | -4.736558               | 2.021765  | -0.640030 |
| 44            | 8             | 0           | -3.987144               | -2.674128 | 0.390959  |
| 45            | 6             | 0           | -6.147139               | 1.877272  | -0.718071 |
| 46            | 6             | 0           | -5.369451               | -2.998144 | 0.352295  |
| 47            | 1             | 0           | -6.535742               | 2.867025  | -0.952925 |
| 48            | 1             | 0           | -6.436292               | 1.178463  | -1.511903 |
| 49            | 1             | 0           | -6.570045               | 1.540633  | 0.235817  |
| 50            | 1             | 0           | -5.431059               | -4.063631 | 0.568606  |
| 51            | 1             | 0           | -5.934830               | -2.443764 | 1.110546  |
| 52            | 1             | 0           | -5.800969               | -2.806304 | -0.637140 |

**Table S38.** Optimized Structural Coordinate and its Total Energy for **12** at PCM- B3LYP-D3/6-311++G(d,p) level  
total energy: HF= -1411.0347546 hartree (NImag = 0)

| Center Number | Atomic Number | Atomic Type | Coordinates (Angstroms) |   |   |
|---------------|---------------|-------------|-------------------------|---|---|
|               |               |             | X                       | Y | Z |



|    |   |   |           |           |           |
|----|---|---|-----------|-----------|-----------|
| 1  | 6 | 0 | 0.082984  | -0.000000 | 2.492111  |
| 2  | 6 | 0 | 0.990588  | 0.000000  | 1.436967  |
| 3  | 6 | 0 | 0.645820  | -0.000000 | -0.081416 |
| 4  | 6 | 0 | 2.363192  | 0.000000  | 1.710332  |
| 5  | 6 | 0 | 3.215295  | 0.000000  | 0.461848  |
| 6  | 6 | 0 | 0.552367  | -0.000000 | 3.810495  |
| 7  | 6 | 0 | 1.919228  | 0.000000  | 4.074118  |
| 8  | 6 | 0 | 2.833033  | 0.000000  | 3.016262  |
| 9  | 6 | 0 | 1.414639  | 1.201961  | -0.704182 |
| 10 | 6 | 0 | 2.779793  | 1.204564  | -0.365365 |
| 11 | 6 | 0 | 3.635043  | 2.179711  | -0.855760 |
| 12 | 6 | 0 | 0.944760  | 2.139485  | -1.618257 |
| 13 | 6 | 0 | 1.807917  | 3.122116  | -2.118384 |
| 14 | 6 | 0 | 3.141411  | 3.157888  | -1.725154 |
| 15 | 6 | 0 | 1.414640  | -1.201961 | -0.704182 |
| 16 | 6 | 0 | 2.779794  | -1.204563 | -0.365364 |
| 17 | 6 | 0 | 3.635044  | -2.179710 | -0.855760 |
| 18 | 6 | 0 | 0.944761  | -2.139485 | -1.618256 |
| 19 | 6 | 0 | 1.807918  | -3.122117 | -2.118383 |
| 20 | 6 | 0 | 3.141412  | -3.157888 | -1.725153 |
| 21 | 6 | 0 | -0.869644 | -0.000000 | -0.220566 |
| 22 | 6 | 0 | -1.593795 | 1.195757  | -0.174003 |
| 23 | 6 | 0 | -1.593795 | -1.195757 | -0.174003 |
| 24 | 6 | 0 | -2.984182 | 1.174895  | -0.182633 |
| 25 | 6 | 0 | -2.984182 | -1.174896 | -0.182634 |
| 26 | 6 | 0 | -3.718674 | -0.000000 | -0.202628 |
| 27 | 7 | 0 | -3.714057 | 2.463175  | -0.151418 |
| 28 | 7 | 0 | -3.714058 | -2.463175 | -0.151418 |
| 29 | 1 | 0 | -0.984623 | -0.000000 | 2.315850  |
| 30 | 1 | 0 | 4.283631  | 0.000001  | 0.674004  |
| 31 | 1 | 0 | -0.158649 | -0.000000 | 4.628644  |
| 32 | 1 | 0 | 2.276050  | 0.000000  | 5.097708  |
| 33 | 1 | 0 | 3.900480  | 0.000001  | 3.208537  |
| 34 | 1 | 0 | 4.684601  | 2.166007  | -0.582398 |
| 35 | 1 | 0 | -0.076170 | 2.116888  | -1.974845 |
| 36 | 1 | 0 | 1.428048  | 3.853690  | -2.822171 |
| 37 | 1 | 0 | 3.803768  | 3.923903  | -2.111696 |
| 38 | 1 | 0 | 4.684602  | -2.166006 | -0.582397 |
| 39 | 1 | 0 | -0.076169 | -2.116889 | -1.974844 |
| 40 | 1 | 0 | 1.428050  | -3.853690 | -2.822170 |
| 41 | 1 | 0 | 3.803769  | -3.923902 | -2.111695 |
| 42 | 1 | 0 | -1.094664 | 2.148620  | -0.094989 |
| 43 | 1 | 0 | -1.094665 | -2.148621 | -0.094989 |
| 44 | 1 | 0 | -4.797774 | 0.000000  | -0.213067 |
| 45 | 8 | 0 | -4.937643 | 2.424122  | -0.143836 |
| 46 | 8 | 0 | -3.052712 | 3.493602  | -0.136159 |
| 47 | 8 | 0 | -4.937643 | -2.424122 | -0.143835 |
| 48 | 8 | 0 | -3.052712 | -3.493602 | -0.136161 |

**Table S39.** Optimized Structural Coordinate and its Total Energy for **13** at PCM- B3LYP-D3/6-311++G(d,p) level  
total energy: HF= -1112.6624914 hartree (NImag = 0)

| Center Number | Atomic Number | Atomic Type | Coordinates (Angstroms) |           |           |
|---------------|---------------|-------------|-------------------------|-----------|-----------|
|               |               |             | X                       | Y         | Z         |
| 1             | 6             | 0           | -0.638872               | -0.009844 | 2.423415  |
| 2             | 6             | 0           | 0.324208                | -0.007459 | 1.418444  |
| 3             | 6             | 0           | 0.047778                | 0.000581  | -0.113602 |
| 4             | 6             | 0           | 1.679045                | -0.010644 | 1.767885  |
| 5             | 6             | 0           | 2.596652                | -0.004547 | 0.567219  |
| 6             | 6             | 0           | -0.241884               | -0.016381 | 3.765010  |
| 7             | 6             | 0           | 1.109446                | -0.020457 | 4.104386  |
| 8             | 6             | 0           | 2.079145                | -0.017356 | 3.097960  |
| 9             | 6             | 0           | 0.859946                | 1.200799  | -0.688406 |
| 10            | 6             | 0           | 2.205862                | 1.202851  | -0.277453 |
| 11            | 6             | 0           | 3.090328                | 2.175313  | -0.720495 |
| 12            | 6             | 0           | 0.446229                | 2.139267  | -1.629078 |
| 13            | 6             | 0           | 1.338674                | 3.117989  | -2.083758 |
| 14            | 6             | 0           | 2.649149                | 3.153263  | -1.617868 |
| 15            | 6             | 0           | 0.859045                | -1.193655 | -0.702272 |
| 16            | 6             | 0           | 2.204857                | -1.201830 | -0.291126 |
| 17            | 6             | 0           | 3.088524                | -2.169910 | -0.745284 |

|    |   |   |           |           |           |
|----|---|---|-----------|-----------|-----------|
| 18 | 6 | 0 | 0.444536  | -2.120656 | -1.654057 |
| 19 | 6 | 0 | 1.336185  | -3.094947 | -2.119736 |
| 20 | 6 | 0 | 2.646507  | -3.137005 | -1.653951 |
| 21 | 6 | 0 | -1.466062 | 0.002037  | -0.324605 |
| 22 | 6 | 0 | -2.178236 | 1.204630  | -0.297716 |
| 23 | 6 | 0 | -2.177976 | -1.201274 | -0.313499 |
| 24 | 6 | 0 | -3.581217 | 1.212056  | -0.329716 |
| 25 | 6 | 0 | -3.580325 | -1.209088 | -0.347391 |
| 26 | 6 | 0 | -4.279133 | 0.001648  | -0.374336 |
| 27 | 7 | 0 | -4.274448 | 2.424404  | -0.244847 |
| 28 | 7 | 0 | -4.272502 | -2.423724 | -0.406723 |
| 29 | 1 | 0 | -1.691997 | -0.005295 | 2.175068  |
| 30 | 1 | 0 | 3.652908  | -0.006452 | 0.834835  |
| 31 | 1 | 0 | -0.996215 | -0.017404 | 4.543986  |
| 32 | 1 | 0 | 1.409737  | -0.025300 | 5.146276  |
| 33 | 1 | 0 | 3.134978  | -0.019593 | 3.347677  |
| 34 | 1 | 0 | 4.123504  | 2.157914  | -0.389794 |
| 35 | 1 | 0 | -0.557467 | 2.113101  | -2.029440 |
| 36 | 1 | 0 | 1.001024  | 3.848348  | -2.810674 |
| 37 | 1 | 0 | 3.334231  | 3.916622  | -1.969191 |
| 38 | 1 | 0 | 4.121684  | -2.157280 | -0.414280 |
| 39 | 1 | 0 | -0.558940 | -2.089611 | -2.054628 |
| 40 | 1 | 0 | 0.997631  | -3.816476 | -2.854965 |
| 41 | 1 | 0 | 3.330892  | -3.896936 | -2.013979 |
| 42 | 1 | 0 | -1.660755 | 2.147923  | -0.193338 |
| 43 | 1 | 0 | -1.659601 | -2.146065 | -0.229693 |
| 44 | 1 | 0 | -5.364508 | 0.000955  | -0.406447 |
| 45 | 1 | 0 | -5.218690 | 2.409717  | -0.604172 |
| 46 | 1 | 0 | -3.765985 | 3.234468  | -0.570406 |
| 47 | 1 | 0 | -5.215982 | -2.401324 | -0.045337 |
| 48 | 1 | 0 | -3.762269 | -3.224346 | -0.060327 |

**Table S40.** Optimized Structural Coordinate and its Total Energy for phenyltriptycene at PCM- B3LYP-D3/6-311++G(d,p) level  
total energy: HF= -1001.8990148 hartree (NImag = 0)

| Center Number | Atomic Number | Atomic Type | Coordinates (Angstroms) |           |           |
|---------------|---------------|-------------|-------------------------|-----------|-----------|
|               |               |             | X                       | Y         | Z         |
| 1             | 6             | 0           | -1.187638               | 2.328685  | -0.000007 |
| 2             | 6             | 0           | -0.162929               | 1.386764  | -0.000002 |
| 3             | 6             | 0           | -0.338919               | -0.160176 | -0.000001 |
| 4             | 6             | 0           | 1.167365                | 1.821642  | -0.000000 |
| 5             | 6             | 0           | 2.159736                | 0.681934  | 0.000002  |
| 6             | 6             | 0           | -0.876703               | 3.693093  | -0.000008 |
| 7             | 6             | 0           | 0.449998                | 4.117189  | -0.000005 |
| 8             | 6             | 0           | 1.481738                | 3.174163  | -0.000002 |
| 9             | 6             | 0           | 0.506896                | -0.688230 | -1.198070 |
| 10            | 6             | 0           | 1.823625                | -0.192210 | -1.202809 |
| 11            | 6             | 0           | 2.733743                | -0.582376 | -2.174083 |
| 12            | 6             | 0           | 0.152527                | -1.656701 | -2.132278 |
| 13            | 6             | 0           | 1.071121                | -2.057234 | -3.110500 |
| 14            | 6             | 0           | 2.349333                | -1.509462 | -3.148271 |
| 15            | 6             | 0           | 0.506893                | -0.688228 | 1.198071  |
| 16            | 6             | 0           | 1.823623                | -0.192208 | 1.202813  |
| 17            | 6             | 0           | 2.733737                | -0.582372 | 2.174090  |
| 18            | 6             | 0           | 0.152520                | -1.656695 | 2.132283  |
| 19            | 6             | 0           | 1.071111                | -2.057225 | 3.110508  |
| 20            | 6             | 0           | 2.349323                | -1.509455 | 3.148280  |
| 21            | 6             | 0           | -1.832905               | -0.474267 | -0.000001 |
| 22            | 6             | 0           | -2.562088               | -0.507360 | -1.197217 |
| 23            | 6             | 0           | -2.562090               | -0.507347 | 1.197214  |
| 24            | 6             | 0           | -3.948221               | -0.655368 | -1.200322 |
| 25            | 6             | 0           | -3.948222               | -0.655356 | 1.200319  |
| 26            | 6             | 0           | -4.649226               | -0.748539 | -0.000001 |
| 27            | 1             | 0           | -4.479037               | -0.682392 | -2.145458 |
| 28            | 1             | 0           | -4.479039               | -0.682370 | 2.145455  |
| 29            | 1             | 0           | -2.224028               | 2.017807  | -0.000009 |
| 30            | 1             | 0           | 3.196648                | 1.016498  | 0.000003  |
| 31            | 1             | 0           | -1.679071               | 4.422363  | -0.000012 |
| 32            | 1             | 0           | 0.683596                | 5.175966  | -0.000006 |
| 33            | 1             | 0           | 2.519436                | 3.490709  | -0.000000 |
| 34            | 1             | 0           | 3.743819                | -0.186783 | -2.158901 |
| 35            | 1             | 0           | -0.822011               | -2.123790 | -2.105556 |

|    |   |   |           |           |           |
|----|---|---|-----------|-----------|-----------|
| 36 | 1 | 0 | 0.779328  | -2.806324 | -3.838036 |
| 37 | 1 | 0 | 3.054630  | -1.819456 | -3.911044 |
| 38 | 1 | 0 | 3.743813  | -0.186780 | 2.158910  |
| 39 | 1 | 0 | -0.822019 | -2.123781 | 2.105560  |
| 40 | 1 | 0 | 0.779315  | -2.806313 | 3.838046  |
| 41 | 1 | 0 | 3.054619  | -1.819448 | 3.911056  |
| 42 | 1 | 0 | -2.054591 | -0.377748 | -2.142814 |
| 43 | 1 | 0 | -2.054593 | -0.377726 | 2.142810  |
| 44 | 1 | 0 | -5.726893 | -0.866393 | -0.000001 |

**Table S41.** Optimized Structural Coordinate and its Total Energy for *m*-dinitrobenzene at PCM- B3LYP-D3/6-311++G(d,p) level total energy: HF= -641.4531891 hartree (NImag = 0)

| Center Number | Atomic Number | Atomic Type | Coordinates (Angstroms) |           |           |
|---------------|---------------|-------------|-------------------------|-----------|-----------|
|               |               |             | X                       | Y         | Z         |
| 1             | 6             | 0           | -0.000000               | -2.238214 | 0.000003  |
| 2             | 6             | 0           | -1.207855               | -1.546268 | 0.000001  |
| 3             | 6             | 0           | -1.183201               | -0.153892 | 0.000000  |
| 4             | 6             | 0           | -0.000000               | 0.571151  | 0.000000  |
| 5             | 6             | 0           | 1.183201                | -0.153892 | 0.000001  |
| 6             | 6             | 0           | 1.207855                | -1.546268 | 0.000002  |
| 7             | 7             | 0           | 2.464073                | 0.588868  | 0.000001  |
| 8             | 8             | 0           | 3.499863                | -0.064191 | -0.000008 |
| 9             | 8             | 0           | 2.414934                | 1.812005  | 0.000004  |
| 10            | 7             | 0           | -2.464073               | 0.588868  | -0.000001 |
| 11            | 8             | 0           | -2.414934               | 1.812005  | 0.000002  |
| 12            | 8             | 0           | -3.499863               | -0.064191 | -0.000005 |
| 13            | 1             | 0           | -0.000000               | -3.320325 | 0.000004  |
| 14            | 1             | 0           | -2.154687               | -2.067607 | 0.000001  |
| 15            | 1             | 0           | 0.000000                | 1.650663  | -0.000000 |
| 16            | 1             | 0           | 2.154686                | -2.067607 | 0.000003  |

**Table S42.** Optimized Structural Coordinate and its Total Energy for *m*-diaminobenzene at PCM- B3LYP-D3/6-311++G(d,p) level total energy: HF= -343.0812178 hartree (NImag = 0)

| Center Number | Atomic Number | Atomic Type | Coordinates (Angstroms) |           |           |
|---------------|---------------|-------------|-------------------------|-----------|-----------|
|               |               |             | X                       | Y         | Z         |
| 1             | 6             | 0           | 0.000000                | 0.000000  | 1.792450  |
| 2             | 6             | 0           | 0.000188                | -1.215179 | 1.113169  |
| 3             | 6             | 0           | -0.000000               | -1.219414 | -0.291918 |
| 4             | 6             | 0           | -0.000000               | -0.000000 | -0.981300 |
| 5             | 6             | 0           | 0.000000                | 1.219414  | -0.291918 |
| 6             | 6             | 0           | -0.000188               | 1.215179  | 1.113169  |
| 7             | 7             | 0           | -0.061566               | 2.425913  | -0.997740 |
| 8             | 1             | 0           | 0.284102                | 3.233162  | -0.497993 |
| 9             | 1             | 0           | 0.296181                | 2.393901  | -1.942246 |
| 10            | 7             | 0           | 0.061566                | -2.425913 | -0.997740 |
| 11            | 1             | 0           | -0.296181               | -2.393901 | -1.942246 |
| 12            | 1             | 0           | -0.284102               | -3.233162 | -0.497993 |
| 13            | 1             | 0           | 0.000000                | 0.000000  | 2.877384  |
| 14            | 1             | 0           | 0.004424                | -2.152570 | 1.658542  |
| 15            | 1             | 0           | -0.000000               | -0.000000 | -2.067548 |
| 16            | 1             | 0           | -0.004424               | 2.152570  | 1.658542  |

**Table S43.** Optimized Structural Coordinate and its Total Energy for benzene at PCM- B3LYP-D3/6-311++G(d,p) level total energy: HF= -232.3183712 hartree (NImag = 0)

| Center Number | Atomic Number | Atomic Type | Coordinates (Angstroms) |           |           |
|---------------|---------------|-------------|-------------------------|-----------|-----------|
|               |               |             | X                       | Y         | Z         |
| 1             | 6             | 0           | 0.000000                | -0.000000 | 1.395788  |
| 2             | 6             | 0           | 0.000000                | 1.208752  | 0.697888  |
| 3             | 6             | 0           | 0.000000                | 1.208752  | -0.697888 |
| 4             | 6             | 0           | 0.000000                | -0.000000 | -1.395788 |
| 5             | 6             | 0           | -0.000000               | -1.208752 | -0.697888 |
| 6             | 6             | 0           | -0.000000               | -1.208752 | 0.697888  |
| 7             | 1             | 0           | 0.000000                | -0.000000 | 2.480188  |

|    |   |   |           |           |           |
|----|---|---|-----------|-----------|-----------|
| 8  | 1 | 0 | 0.000000  | 2.147890  | 1.240056  |
| 9  | 1 | 0 | 0.000000  | 2.147890  | -1.240056 |
| 10 | 1 | 0 | 0.000000  | -0.000000 | -2.480188 |
| 11 | 1 | 0 | -0.000000 | -2.147890 | -1.240056 |
| 12 | 1 | 0 | -0.000000 | -2.147890 | 1.240056  |

**Table S44.** Optimized Structural Coordinate and its Total Energy for **14** (Rotamer A) at PCM- B3LYP-D3/6-311++G(d,p) level total energy: HF= -2609.8888448 hartree (NImag = 0)

| Center Number | Atomic Number | Atomic Type | Coordinates (Angstroms) |           |           |
|---------------|---------------|-------------|-------------------------|-----------|-----------|
|               |               |             | X                       | Y         | Z         |
| 1             | 1             | 0           | -1.848688               | -0.727179 | 2.285480  |
| 2             | 6             | 0           | -0.793334               | -0.723846 | 2.519055  |
| 3             | 6             | 0           | 0.157863                | -0.460787 | 1.535238  |
| 4             | 6             | 0           | -0.130637               | -0.174633 | 0.025262  |
| 5             | 6             | 0           | 1.508984                | -0.479092 | 1.880221  |
| 6             | 6             | 0           | 2.407787                | -0.200636 | 0.704986  |
| 7             | 6             | 0           | -0.379718               | -0.988540 | 3.828244  |
| 8             | 6             | 0           | 0.973303                | -0.992448 | 4.161868  |
| 9             | 6             | 0           | 1.930210                | -0.735962 | 3.178309  |
| 10            | 1             | 0           | 2.988350                | -0.739462 | 3.415489  |
| 11            | 6             | 0           | 0.633888                | 1.136009  | -0.357112 |
| 12            | 6             | 0           | 1.964770                | 1.137211  | 0.122632  |
| 13            | 6             | 0           | 2.786816                | 2.235177  | -0.070419 |
| 14            | 17            | 0           | 4.434016                | 2.254996  | 0.559824  |
| 15            | 6             | 0           | 0.269048                | 2.169080  | -1.222962 |
| 16            | 6             | 0           | 1.098991                | 3.282489  | -1.401266 |
| 17            | 6             | 0           | 2.342820                | 3.339584  | -0.797062 |
| 18            | 6             | 0           | 0.710417                | -1.205579 | -0.778022 |
| 19            | 6             | 0           | 2.060551                | -1.225418 | -0.371650 |
| 20            | 6             | 0           | 2.952544                | -2.065423 | -1.020250 |
| 21            | 6             | 0           | 0.310498                | -1.947481 | -1.882530 |
| 22            | 6             | 0           | 1.229947                | -2.781434 | -2.527306 |
| 23            | 6             | 0           | 2.545857                | -2.863201 | -2.091618 |
| 24            | 1             | 0           | 3.459767                | -0.208332 | 0.967085  |
| 25            | 1             | 0           | -1.125105               | -1.192405 | 4.588639  |
| 26            | 1             | 0           | 1.283208                | -1.197028 | 5.180357  |
| 27            | 17            | 0           | -1.143007               | 2.107855  | -2.278903 |
| 28            | 1             | 0           | 0.770125                | 4.090332  | -2.041693 |
| 29            | 1             | 0           | 2.983212                | 4.200817  | -0.933743 |
| 30            | 1             | 0           | -0.696728               | -1.874486 | -2.264770 |
| 31            | 1             | 0           | 0.913748                | -3.368763 | -3.381332 |
| 32            | 1             | 0           | 3.258563                | -3.512071 | -2.583756 |
| 33            | 17            | 0           | 4.648543                | -2.127387 | -0.527127 |
| 34            | 6             | 0           | -1.649659               | -0.162026 | -0.120342 |
| 35            | 6             | 0           | -2.343564               | 0.980836  | 0.282463  |
| 36            | 6             | 0           | -2.368145               | -1.321889 | -0.404648 |
| 37            | 6             | 0           | -3.734511               | 0.986923  | 0.325144  |
| 38            | 6             | 0           | -3.765430               | -1.313357 | -0.358671 |
| 39            | 6             | 0           | -4.468205               | -0.158779 | -0.006460 |
| 40            | 1             | 0           | -5.545814               | -0.153324 | 0.022221  |
| 41            | 1             | 0           | -1.820865               | 1.882131  | 0.572177  |
| 42            | 1             | 0           | -1.882526               | -2.261732 | -0.616522 |
| 43            | 8             | 0           | -4.306880               | 2.166370  | 0.707616  |
| 44            | 8             | 0           | -4.365748               | -2.500953 | -0.666662 |
| 45            | 6             | 0           | -5.728779               | 2.244737  | 0.798935  |
| 46            | 6             | 0           | -5.789523               | -2.584927 | -0.618722 |
| 47            | 1             | 0           | -5.949062               | 3.259406  | 1.125393  |
| 48            | 1             | 0           | -6.200516               | 2.066921  | -0.173008 |
| 49            | 1             | 0           | -6.120725               | 1.534090  | 1.534034  |
| 50            | 1             | 0           | -6.035072               | -3.610949 | -0.886324 |
| 51            | 1             | 0           | -6.167219               | -2.371654 | 0.386662  |
| 52            | 1             | 0           | -6.252739               | -1.902052 | -1.338418 |

**Table S45.** Optimized Structural Coordinate and its Total Energy for **14** (Rotamer B) at PCM- B3LYP-D3/6-311++G(d,p) level total energy: HF= -2609.8855398 hartree (NImag = 0)

| Center Number | Atomic Number | Atomic Type | Coordinates (Angstroms) |   |   |
|---------------|---------------|-------------|-------------------------|---|---|
|               |               |             | X                       | Y | Z |

|    |    |   |           |           |           |
|----|----|---|-----------|-----------|-----------|
| 1  | 17 | 0 | -2.050225 | 2.290040  | -1.124129 |
| 2  | 6  | 0 | -0.296482 | 2.176000  | -0.937011 |
| 3  | 6  | 0 | 0.414200  | 1.118346  | -0.346302 |
| 4  | 6  | 0 | -0.081574 | -0.241340 | 0.288772  |
| 5  | 6  | 0 | 1.819215  | 1.261549  | -0.286369 |
| 6  | 6  | 0 | 2.524759  | 0.107862  | 0.380423  |
| 7  | 6  | 0 | 0.371487  | 3.297006  | -1.447558 |
| 8  | 6  | 0 | 1.747380  | 3.408510  | -1.385259 |
| 9  | 6  | 0 | 2.467921  | 2.377171  | -0.794938 |
| 10 | 17 | 0 | 4.223534  | 2.530204  | -0.709285 |
| 11 | 6  | 0 | 0.745389  | -1.380468 | -0.400046 |
| 12 | 6  | 0 | 2.131084  | -1.143972 | -0.382130 |
| 13 | 6  | 0 | 3.000329  | -2.081791 | -0.919476 |
| 14 | 17 | 0 | 4.743737  | -1.792124 | -0.920864 |
| 15 | 6  | 0 | 0.273868  | -2.608626 | -0.853715 |
| 16 | 6  | 0 | 1.165648  | -3.548789 | -1.378610 |
| 17 | 6  | 0 | 2.528045  | -3.286672 | -1.439386 |
| 18 | 6  | 0 | 0.522252  | -0.298516 | 1.731322  |
| 19 | 6  | 0 | 1.904892  | -0.061678 | 1.755930  |
| 20 | 6  | 0 | 2.633385  | -0.111271 | 2.935180  |
| 21 | 6  | 0 | -0.099848 | -0.702425 | 2.910677  |
| 22 | 6  | 0 | 0.630418  | -0.762163 | 4.103369  |
| 23 | 6  | 0 | 1.984680  | -0.444765 | 4.126902  |
| 24 | 1  | 0 | 3.598309  | 0.248014  | 0.428304  |
| 25 | 1  | 0 | -0.209688 | 4.090634  | -1.897856 |
| 26 | 1  | 0 | 2.250734  | 4.279319  | -1.783659 |
| 27 | 1  | 0 | -0.773948 | -2.859302 | -0.793394 |
| 28 | 1  | 0 | 0.788456  | -4.497784 | -1.741279 |
| 29 | 1  | 0 | 3.220311  | -4.008177 | -1.853346 |
| 30 | 1  | 0 | -1.138925 | -0.994326 | 2.922596  |
| 31 | 1  | 0 | 0.128584  | -1.067828 | 5.014438  |
| 32 | 1  | 0 | 2.541443  | -0.487794 | 5.055933  |
| 33 | 1  | 0 | 3.700950  | 0.078760  | 2.919711  |
| 34 | 6  | 0 | -1.599075 | -0.390415 | 0.184602  |
| 35 | 6  | 0 | -2.176560 | -0.886483 | -0.986494 |
| 36 | 6  | 0 | -2.437048 | 0.121014  | 1.176625  |
| 37 | 6  | 0 | -3.561370 | -0.916301 | -1.138551 |
| 38 | 6  | 0 | -3.822305 | 0.089802  | 1.021214  |
| 39 | 6  | 0 | -4.406539 | -0.442592 | -0.131092 |
| 40 | 1  | 0 | -5.477926 | -0.468641 | -0.248470 |
| 41 | 1  | 0 | -1.578365 | -1.188921 | -1.832477 |
| 42 | 1  | 0 | -2.048821 | 0.626189  | 2.046999  |
| 43 | 8  | 0 | -4.008997 | -1.416675 | -2.328206 |
| 44 | 8  | 0 | -4.538177 | 0.625503  | 2.053876  |
| 45 | 6  | 0 | -5.413171 | -1.435883 | -2.581488 |
| 46 | 6  | 0 | -5.960429 | 0.678010  | 1.950867  |
| 47 | 1  | 0 | -5.528690 | -1.853913 | -3.579763 |
| 48 | 1  | 0 | -5.939364 | -2.070180 | -1.860458 |
| 49 | 1  | 0 | -5.835005 | -0.425746 | -2.559891 |
| 50 | 1  | 0 | -6.306737 | 1.152332  | 2.867240  |
| 51 | 1  | 0 | -6.274899 | 1.277680  | 1.090454  |
| 52 | 1  | 0 | -6.391984 | -0.325706 | 1.877534  |

**Table S46.** Optimized Structural Coordinate and its Total Energy for **14** (Rotamer C) at PCM- B3LYP-D3/6-311++G(d,p) level  
total energy: HF= -2609.8889592 hartree (NImag = 0)

| Center Number | Atomic Number | Atomic Type | Coordinates (Angstroms) |           |           |
|---------------|---------------|-------------|-------------------------|-----------|-----------|
|               |               |             | X                       | Y         | Z         |
| 1             | 1             | 0           | -1.480905               | -1.949636 | -1.374060 |
| 2             | 6             | 0           | -0.404954               | -2.044256 | -1.382021 |
| 3             | 6             | 0           | 0.393942                | -1.197758 | -0.618284 |
| 4             | 6             | 0           | -0.122057               | -0.067034 | 0.334378  |
| 5             | 6             | 0           | 1.783135                | -1.353708 | -0.639219 |
| 6             | 6             | 0           | 2.486980                | -0.378881 | 0.266008  |
| 7             | 6             | 0           | 0.190289                | -3.032402 | -2.170008 |
| 8             | 6             | 0           | 1.572239                | -3.185238 | -2.204803 |
| 9             | 6             | 0           | 2.361192                | -2.336637 | -1.430973 |
| 10            | 17            | 0           | 4.115689                | -2.538509 | -1.467053 |
| 11            | 6             | 0           | 0.500775                | -0.362824 | 1.726344  |
| 12            | 6             | 0           | 1.891833                | -0.558285 | 1.659620  |
| 13            | 6             | 0           | 2.640053                | -0.789378 | 2.803650  |
| 14            | 1             | 0           | 3.711753                | -0.938126 | 2.729744  |

|    |    |   |           |           |           |
|----|----|---|-----------|-----------|-----------|
| 15 | 6  | 0 | -0.113954 | -0.307885 | 2.972844  |
| 16 | 6  | 0 | 0.640094  | -0.536963 | 4.130324  |
| 17 | 6  | 0 | 2.004362  | -0.797213 | 4.049603  |
| 18 | 6  | 0 | 0.656905  | 1.239489  | -0.031903 |
| 19 | 6  | 0 | 2.045771  | 1.012145  | -0.176600 |
| 20 | 6  | 0 | 2.897633  | 2.038848  | -0.548879 |
| 21 | 6  | 0 | 0.224675  | 2.567236  | -0.049883 |
| 22 | 6  | 0 | 1.087975  | 3.597673  | -0.441392 |
| 23 | 6  | 0 | 2.416033  | 3.335203  | -0.728879 |
| 24 | 1  | 0 | 3.565621  | -0.490805 | 0.260225  |
| 25 | 1  | 0 | -0.432547 | -3.690792 | -2.764154 |
| 26 | 1  | 0 | 2.035378  | -3.948906 | -2.816127 |
| 27 | 1  | 0 | -1.163523 | -0.068967 | 3.065324  |
| 28 | 1  | 0 | 0.150745  | -0.501917 | 5.097039  |
| 29 | 1  | 0 | 2.580025  | -0.977295 | 4.950239  |
| 30 | 17 | 0 | -1.344832 | 3.093885  | 0.559873  |
| 31 | 1  | 0 | 0.713313  | 4.611655  | -0.490323 |
| 32 | 1  | 0 | 3.082295  | 4.131600  | -1.032742 |
| 33 | 17 | 0 | 4.624286  | 1.749867  | -0.762532 |
| 34 | 6  | 0 | -1.639200 | -0.037493 | 0.172313  |
| 35 | 6  | 0 | -2.475554 | -0.808854 | 0.976759  |
| 36 | 6  | 0 | -2.174168 | 0.586895  | -0.956594 |
| 37 | 6  | 0 | -3.842358 | -0.892386 | 0.694470  |
| 38 | 6  | 0 | -3.535197 | 0.503086  | -1.234157 |
| 39 | 6  | 0 | -4.393181 | -0.229933 | -0.404915 |
| 40 | 1  | 0 | -5.448423 | -0.290803 | -0.616478 |
| 41 | 1  | 0 | -2.099351 | -1.396765 | 1.799266  |
| 42 | 1  | 0 | -1.547834 | 1.144352  | -1.639645 |
| 43 | 8  | 0 | -4.568603 | -1.665642 | 1.554564  |
| 44 | 8  | 0 | -3.951816 | 1.172478  | -2.349219 |
| 45 | 6  | 0 | -5.967415 | -1.826017 | 1.321916  |
| 46 | 6  | 0 | -5.328549 | 1.105553  | -2.718805 |
| 47 | 1  | 0 | -6.326487 | -2.480332 | 2.114097  |
| 48 | 1  | 0 | -6.492654 | -0.866958 | 1.378355  |
| 49 | 1  | 0 | -6.158218 | -2.293622 | 0.350356  |
| 50 | 1  | 0 | -5.419597 | 1.694286  | -3.629707 |
| 51 | 1  | 0 | -5.636872 | 0.074424  | -2.920748 |
| 52 | 1  | 0 | -5.970586 | 1.536875  | -1.943814 |

**Table S47.** Optimized Structural Coordinate and its Total Energy for **14 14** (TS1: a transition state between Rotamers A and B) at PCM- B3LYP-D3/6-311++G(d,p) level  
total energy: HF= -2609.8839779 hartree (NImag = 1)

| Center Number | Atomic Number | Atomic Type | Coordinates (Angstroms) |           |           |
|---------------|---------------|-------------|-------------------------|-----------|-----------|
|               |               |             | X                       | Y         | Z         |
| 1             | 1             | 0           | 0.525271                | 3.041256  | -1.001120 |
| 2             | 6             | 0           | -0.496633               | 2.726652  | -0.895414 |
| 3             | 6             | 0           | -0.836877               | 1.488937  | -0.361033 |
| 4             | 6             | 0           | 0.084859                | 0.336712  | 0.159176  |
| 5             | 6             | 0           | -2.206983               | 1.179194  | -0.189291 |
| 6             | 6             | 0           | -2.480330               | -0.149046 | 0.504818  |
| 7             | 6             | 0           | -1.492591               | 3.625476  | -1.293509 |
| 8             | 6             | 0           | -2.835691               | 3.311292  | -1.159302 |
| 9             | 6             | 0           | -3.177587               | 2.081730  | -0.595680 |
| 10            | 17            | 0           | -4.894357               | 1.709069  | -0.396332 |
| 11            | 6             | 0           | -0.375804               | 0.206056  | 1.651858  |
| 12            | 6             | 0           | -1.733281               | -0.074692 | 1.815663  |
| 13            | 6             | 0           | -2.310771               | -0.184808 | 3.073330  |
| 14            | 1             | 0           | -3.367320               | -0.409891 | 3.167660  |
| 15            | 6             | 0           | 0.400893                | 0.451003  | 2.782230  |
| 16            | 6             | 0           | -0.173889               | 0.354734  | 4.053390  |
| 17            | 6             | 0           | -1.518339               | 0.022224  | 4.204353  |
| 18            | 6             | 0           | -0.450784               | -0.920770 | -0.620688 |
| 19            | 6             | 0           | -1.803939               | -1.204293 | -0.341833 |
| 20            | 6             | 0           | -2.435226               | -2.316308 | -0.878283 |
| 21            | 6             | 0           | 0.178537                | -1.717939 | -1.584915 |
| 22            | 6             | 0           | -0.462577               | -2.844021 | -2.114044 |
| 23            | 6             | 0           | -1.757869               | -3.165740 | -1.747937 |
| 24            | 1             | 0           | -3.538652               | -0.340501 | 0.638355  |
| 25            | 1             | 0           | -1.206672               | 4.583299  | -1.711961 |
| 26            | 1             | 0           | -3.609006               | 4.001551  | -1.469857 |
| 27            | 1             | 0           | 1.445779                | 0.712226  | 2.690956  |

|    |    |   |           |           |           |
|----|----|---|-----------|-----------|-----------|
| 28 | 1  | 0 | 0.439213  | 0.542253  | 4.927611  |
| 29 | 1  | 0 | -1.953228 | -0.057183 | 5.194140  |
| 30 | 17 | 0 | 1.745606  | -1.368469 | -2.317808 |
| 31 | 1  | 0 | 0.061590  | -3.457813 | -2.834623 |
| 32 | 1  | 0 | -2.246764 | -4.039285 | -2.158329 |
| 33 | 17 | 0 | -4.118095 | -2.678301 | -0.493088 |
| 34 | 6  | 0 | 1.617520  | 0.394256  | 0.121117  |
| 35 | 6  | 0 | 2.397175  | 1.367373  | -0.493263 |
| 36 | 6  | 0 | 2.265895  | -0.683096 | 0.740945  |
| 37 | 6  | 0 | 3.792818  | 1.266778  | -0.487283 |
| 38 | 6  | 0 | 3.651523  | -0.783329 | 0.742181  |
| 39 | 6  | 0 | 4.441198  | 0.197519  | 0.129934  |
| 40 | 1  | 0 | 5.516681  | 0.124102  | 0.129528  |
| 41 | 1  | 0 | 1.987864  | 2.189351  | -1.049157 |
| 42 | 1  | 0 | 1.700930  | -1.477030 | 1.210618  |
| 43 | 8  | 0 | 4.446209  | 2.277840  | -1.133372 |
| 44 | 8  | 0 | 4.163736  | -1.885328 | 1.365682  |
| 45 | 6  | 0 | 5.871323  | 2.245150  | -1.196814 |
| 46 | 6  | 0 | 5.578455  | -2.071605 | 1.382108  |
| 47 | 1  | 0 | 6.163714  | 3.131915  | -1.756107 |
| 48 | 1  | 0 | 6.315054  | 2.284816  | -0.196550 |
| 49 | 1  | 0 | 6.225616  | 1.351823  | -1.721531 |
| 50 | 1  | 0 | 6.082214  | -1.255483 | 1.910505  |
| 51 | 1  | 0 | 5.748054  | -3.004706 | 1.916172  |
| 52 | 1  | 0 | 5.980346  | -2.156516 | 0.367193  |

**Table S48.** Optimized Structural Coordinate and its Total Energy for **14 14** (TS1: a transition state between Rotamers B and C) at PCM-B3LYP-D3/6-311++G(d,p) level  
total energy: HF= -2609.884448 hartree (NImag = 1)

| Center Number | Atomic Number | Atomic Type | Coordinates (Angstroms) |           |           |
|---------------|---------------|-------------|-------------------------|-----------|-----------|
|               |               |             | X                       | Y         | Z         |
| 1             | 1             | 0           | -1.000068               | -1.621522 | 2.891503  |
| 2             | 6             | 0           | 0.052667                | -1.422019 | 2.798586  |
| 3             | 6             | 0           | 0.596104                | -0.822078 | 1.665605  |
| 4             | 6             | 0           | -0.093130               | -0.312248 | 0.357889  |
| 5             | 6             | 0           | 1.997566                | -0.672461 | 1.608650  |
| 6             | 6             | 0           | 2.532118                | -0.113347 | 0.296914  |
| 7             | 6             | 0           | 0.878830                | -1.816648 | 3.859097  |
| 8             | 6             | 0           | 2.253675                | -1.629272 | 3.800883  |
| 9             | 6             | 0           | 2.817858                | -1.059222 | 2.656595  |
| 10            | 1             | 0           | 3.891347                | -0.927807 | 2.576794  |
| 11            | 6             | 0           | 0.446002                | 1.159533  | 0.219358  |
| 12            | 6             | 0           | 1.849698                | 1.221428  | 0.095215  |
| 13            | 6             | 0           | 2.505863                | 2.426006  | -0.107740 |
| 14            | 17            | 0           | 4.259099                | 2.484188  | -0.291615 |
| 15            | 6             | 0           | -0.238793               | 2.379516  | 0.285951  |
| 16            | 6             | 0           | 0.429937                | 3.590104  | 0.070390  |
| 17            | 6             | 0           | 1.795426                | 3.621807  | -0.152256 |
| 18            | 6             | 0           | 0.616971                | -1.183599 | -0.737450 |
| 19            | 6             | 0           | 2.008944                | -1.042000 | -0.773546 |
| 20            | 6             | 0           | 2.759083                | -1.786618 | -1.672920 |
| 21            | 6             | 0           | 0.002255                | -2.127466 | -1.554879 |
| 22            | 6             | 0           | 0.772182                | -2.880798 | -2.444592 |
| 23            | 6             | 0           | 2.149385                | -2.706831 | -2.523965 |
| 24            | 1             | 0           | 3.613303                | -0.031650 | 0.296010  |
| 25            | 1             | 0           | 0.428829                | -2.277378 | 4.731135  |
| 26            | 1             | 0           | 2.885885                | -1.934674 | 4.626585  |
| 27            | 17            | 0           | -1.933964               | 2.563841  | 0.742101  |
| 28            | 1             | 0           | -0.132619               | 4.513922  | 0.098509  |
| 29            | 1             | 0           | 2.305633                | 4.560824  | -0.320966 |
| 30            | 1             | 0           | -1.065681               | -2.284315 | -1.513356 |
| 31            | 1             | 0           | 0.290157                | -3.610813 | -3.084200 |
| 32            | 1             | 0           | 2.747314                | -3.282780 | -3.218284 |
| 33            | 17            | 0           | 4.515255                | -1.605887 | -1.738546 |
| 34            | 6             | 0           | -1.607337               | -0.365284 | 0.123458  |
| 35            | 6             | 0           | -2.572303               | -0.706229 | 1.063726  |
| 36            | 6             | 0           | -2.030467               | 0.019456  | -1.156291 |
| 37            | 6             | 0           | -3.930937               | -0.665759 | 0.732023  |
| 38            | 6             | 0           | -3.380243               | 0.061469  | -1.482827 |
| 39            | 6             | 0           | -4.356143               | -0.287359 | -0.541225 |
| 40            | 1             | 0           | -5.404518               | -0.256437 | -0.790525 |

|    |   |   |           |           |           |
|----|---|---|-----------|-----------|-----------|
| 41 | 1 | 0 | -2.341088 | -0.943554 | 2.084835  |
| 42 | 1 | 0 | -1.317136 | 0.319187  | -1.912374 |
| 43 | 8 | 0 | -4.782194 | -1.009927 | 1.743471  |
| 44 | 8 | 0 | -3.668117 | 0.463847  | -2.755934 |
| 45 | 6 | 0 | -6.187895 | -0.970606 | 1.501861  |
| 46 | 6 | 0 | -5.034653 | 0.553772  | -3.157153 |
| 47 | 1 | 0 | -6.658066 | -1.268802 | 2.437092  |
| 48 | 1 | 0 | -6.517369 | 0.039072  | 1.235576  |
| 49 | 1 | 0 | -6.475621 | -1.672038 | 0.711764  |
| 50 | 1 | 0 | -5.018179 | 0.898981  | -4.189245 |
| 51 | 1 | 0 | -5.528807 | -0.422207 | -3.109749 |
| 52 | 1 | 0 | -5.583438 | 1.274742  | -2.542536 |

**Table S49.** Optimized Structural Coordinate and its Total Energy for **14 14** (TS1: a transition state between Rotamers C and A) at PCM-B3LYP-D3/6-311++G(d,p) level  
total energy: HF= -2609.869642 hartree (NImag = 1)

| Center Number | Atomic Number | Atomic Type | Coordinates (Angstroms) |           |           |
|---------------|---------------|-------------|-------------------------|-----------|-----------|
|               |               |             | X                       | Y         | Z         |
| 1             | 17            | 0           | -0.696130               | 3.678646  | -0.671515 |
| 2             | 6             | 0           | 0.779960                | 2.759762  | -0.363524 |
| 3             | 6             | 0           | 0.876923                | 1.393135  | -0.073324 |
| 4             | 6             | 0           | -0.159820               | 0.181099  | 0.098204  |
| 5             | 6             | 0           | 2.211141                | 0.909260  | 0.129537  |
| 6             | 6             | 0           | 2.342378                | -0.577912 | 0.450712  |
| 7             | 6             | 0           | 1.912707                | 3.586627  | -0.443988 |
| 8             | 6             | 0           | 3.181583                | 3.093310  | -0.242583 |
| 9             | 6             | 0           | 3.316722                | 1.739084  | 0.045309  |
| 10            | 17            | 0           | 4.952032                | 1.123786  | 0.301243  |
| 11            | 6             | 0           | 0.386891                | -0.837859 | -0.952638 |
| 12            | 6             | 0           | 1.691593                | -1.276778 | -0.717130 |
| 13            | 6             | 0           | 2.282347                | -2.183432 | -1.587852 |
| 14            | 17            | 0           | 3.923151                | -2.767739 | -1.292631 |
| 15            | 6             | 0           | -0.290786               | -1.255607 | -2.094229 |
| 16            | 6             | 0           | 0.322481                | -2.153166 | -2.970036 |
| 17            | 6             | 0           | 1.602451                | -2.637527 | -2.716100 |
| 18            | 6             | 0           | 0.193625                | -0.328765 | 1.530527  |
| 19            | 6             | 0           | 1.502269                | -0.780505 | 1.687456  |
| 20            | 6             | 0           | 1.967199                | -1.254567 | 2.907813  |
| 21            | 6             | 0           | -0.651456               | -0.295431 | 2.637495  |
| 22            | 6             | 0           | -0.190031               | -0.758795 | 3.872375  |
| 23            | 6             | 0           | 1.106858                | -1.253162 | 4.007319  |
| 24            | 1             | 0           | 3.373262                | -0.876912 | 0.596871  |
| 25            | 1             | 0           | 1.776159                | 4.635405  | -0.670329 |
| 26            | 1             | 0           | 4.047307                | 3.738517  | -0.306767 |
| 27            | 1             | 0           | -1.290018               | -0.899702 | -2.303568 |
| 28            | 1             | 0           | -0.204760               | -2.483664 | -3.857238 |
| 29            | 1             | 0           | 2.075548                | -3.343498 | -3.386276 |
| 30            | 1             | 0           | -1.663339               | 0.076948  | 2.548799  |
| 31            | 1             | 0           | -0.851819               | -0.734159 | 4.730697  |
| 32            | 1             | 0           | 1.452874                | -1.619290 | 4.967208  |
| 33            | 1             | 0           | 2.989991                | -1.602424 | 3.002093  |
| 34            | 6             | 0           | -1.707489               | 0.142516  | -0.015348 |
| 35            | 6             | 0           | -2.599153               | 1.164172  | -0.296511 |
| 36            | 6             | 0           | -2.240025               | -1.142396 | 0.209426  |
| 37            | 6             | 0           | -3.979411               | 0.922136  | -0.353091 |
| 38            | 6             | 0           | -3.605850               | -1.381788 | 0.152133  |
| 39            | 6             | 0           | -4.507096               | -0.346564 | -0.131937 |
| 40            | 1             | 0           | -5.568956               | -0.527432 | -0.176242 |
| 41            | 1             | 0           | -2.280688               | 2.167534  | -0.479739 |
| 42            | 1             | 0           | -1.598500               | -1.982903 | 0.434760  |
| 43            | 8             | 0           | -4.739860               | 2.021342  | -0.638910 |
| 44            | 8             | 0           | -3.988972               | -2.672919 | 0.388822  |
| 45            | 6             | 0           | -6.155908               | 1.871406  | -0.721817 |
| 46            | 6             | 0           | -5.377938               | -2.996116 | 0.348807  |
| 47            | 1             | 0           | -6.546390               | 2.860210  | -0.955289 |
| 48            | 1             | 0           | -6.436083               | 1.173372  | -1.517799 |
| 49            | 1             | 0           | -6.576617               | 1.530785  | 0.230152  |
| 50            | 1             | 0           | -5.440574               | -4.060972 | 0.565476  |
| 51            | 1             | 0           | -5.939253               | -2.439160 | 1.106297  |
| 52            | 1             | 0           | -5.804402               | -2.802652 | -0.641053 |
